# Supplementary material for: Cluster randomised controlled trial of a guided self-help mental health intervention in primary care
Source: PubMed Central journal article supplement — BMJ Open. 2019 Feb 27;9(2):e023481. doi: 10.1136/bmjopen-2018-023481 (PMC6398763; doi:10.1136/bmjopen-2018-023481), 2019-02-27
Supplement: bmjopen-2018-023481.draft_revisions.pdf [file bmjopen-2018-023481.draft_revisions.pdf]

# BMJ Open

BMJ Open is committed to open peer review. As part of this commitment we make the peer review history of every article we publish publicly available.

When an article is published we post the peer reviewers' comments and the authors' responses online. We also post the versions of the paper that were used during peer review. These are the versions that the peer review comments apply to.

The versions of the paper that follow are the versions that were submitted during the peer review process. They are not the versions of record or the final published versions. They should not be cited or distributed as the published version of this manuscript.

BMJ Open is an open access journal and the full, final, typeset and author-corrected version of record of the manuscript is available on our site with no access controls, subscription charges or pay-per-view fees (<http://bmjopen.bmj.com>).

If you have any questions on BMJ Open's open peer review process please email [info.bmjopen@bmj.com](mailto:info.bmjopen@bmj.com)

# BMJ Open

## A cluster randomised controlled trial of a guided self-help mental health intervention in primary care

|                               |                                                                                                                                                                                                                                                                                                                                                                                                                                                                    |
|-------------------------------|--------------------------------------------------------------------------------------------------------------------------------------------------------------------------------------------------------------------------------------------------------------------------------------------------------------------------------------------------------------------------------------------------------------------------------------------------------------------|
| Journal:                      | <i>BMJ Open</i>                                                                                                                                                                                                                                                                                                                                                                                                                                                    |
| Manuscript ID                 | bmjopen-2018-023481                                                                                                                                                                                                                                                                                                                                                                                                                                                |
| Article Type:                 | Research                                                                                                                                                                                                                                                                                                                                                                                                                                                           |
| Date Submitted by the Author: | 25-Apr-2018                                                                                                                                                                                                                                                                                                                                                                                                                                                        |
| Complete List of Authors:     | Mathieson, Fiona; University of Otago – Wellington, Department of Psychological Medicine<br>Stanley, James; University of Otago, Wellington, Public Health; University of Otago, Wellington<br>Collings, Catherine (Sunny) ; University of Otago Wellington, Deans Department<br>Tester, Rachel; University of Otago, Wellington, Primary Health Care and General Practice<br>Dowell, Anthony; Wellington School of Medicine and Health Sciences, General Practice |
| Keywords:                     | MENTAL HEALTH, PRIMARY CARE, BRIEF INTERVENTIONS                                                                                                                                                                                                                                                                                                                                                                                                                   |
|                               |                                                                                                                                                                                                                                                                                                                                                                                                                                                                    |

SCHOLARONE™  
Manuscripts

## A cluster randomised controlled trial of a guided self-help mental health intervention in primary care

Fiona Mathieson<sup>1</sup>

Email: [fiona.mathieson@otago.ac.nz](mailto:fiona.mathieson@otago.ac.nz)

James Stanley<sup>2</sup>

Email: [james.stanley@otago.ac.nz](mailto:james.stanley@otago.ac.nz)

Sunny Collings<sup>3</sup>

Email: [deanseauow@otago.ac.nz](mailto:deanseauow@otago.ac.nz)

Rachel Tester<sup>4</sup>

Email: [rachel.testers@otago.ac.nz](mailto:rachel.testers@otago.ac.nz)

Anthony Dowell<sup>4</sup>

Email: [tony.dowell@otago.ac.nz](mailto:tony.dowell@otago.ac.nz)

\* Corresponding author: [fiona.mathieson@otago.ac.nz](mailto:fiona.mathieson@otago.ac.nz) Ph. 64 4 9186034, Fax 64 4 3855877

<sup>1</sup>Department of Psychological Medicine, University of Otago, PO Box 7343, Wellington South 6242, New Zealand

<sup>2</sup>Biostatistical Group, Dean's Department, University of Otago, PO Box 7343, Wellington South 6242, New Zealand

<sup>3</sup>Office of the Dean and Head of Campus Te Tari Manutaki, Department of Psychological Medicine, University of Otago, PO Box 7343, Wellington South 6242, New Zealand

<sup>4</sup>Department of Primary Health Care and General Practice, University of Otago, PO Box 7343, Wellington South 6242, New Zealand

Word Count: 5801

### Abstract

**Objectives:** To ascertain whether an ultra-brief intervention improves outcomes for patients in general practice with mild-to-moderate mental health concerns.

**Trial design:** Two-arm cluster randomised controlled trial.

### Methods:

**Participants:** General practitioners (GPs) were invited based on working in a participating general practice. Patients were eligible to participate if aged 18-65, scored  $\leq 35$  on the Kessler-10 (K10) and if meeting local mental health access criteria (based on age, low income, or ethnic group).

**Interventions:** Intervention arm GPs were trained on the ultra-brief intervention (UBI) approach, with participating patients receiving three structured appointments over five weeks. GPs randomised to Practice as Usual (PAU) did not receive training, and delivered support following their existing practice approaches.

1  
2  
3 **Outcome Measures:** Primary outcome was patient-level K10 score at 6 months post-  
4 recruitment.

5  
6 **Randomisation:** GP practices were randomised to UBI training or PAU at the start of the  
7 study.

8  
9 **Blinding:** GPs were not blinded to group assignment.

## 10 **Results:**

11  
12  
13 **Numbers randomised:** 62 GPs (recruiting 85 patients) were randomised to UBI, and 50 to  
14 PAU (recruiting 75 patients).

15  
16  
17 **Numbers analysed:** 31 GPs recruited at least one patient in the UBI arm (70 patients  
18 analysed), and 21 GPs recruited at least one patient in the PAU arm (69 patients analysed).

19  
20 **Outcome:** K10 scores from an intention-to-treat analysis were similar in UBI and PAU  
21 arms, with a wide confidence interval (mean adjusted K10 difference = 1.68 points higher in  
22 UBI arm, 95% CI -1.18, 4.55). Secondary outcomes were also similar in the two groups.

23  
24 **Conclusions:** The UBI intervention did lead to better outcomes than practice as usual.  
25 Results from 'negative trials' such as this contribute to the continuing development of brief  
26 psychological therapy options for primary care.

27  
28  
29 **Trial registration:** Australia New Zealand Clinical Trials Registry ACTRN12613000041752

30  
31 **Funding:** Compass Health, Oakley Mental Health Research Foundation, Wellington Medical  
32 Research Foundation, University of Otago Research Fund

## 33 **Strengths and limitations**

- 34  
35  
36  
37  
38  
39  
40  
41  
42  
43  
44  
45  
46  
47  
48  
49  
50  
51  
52  
53  
54  
55  
56  
57  
58  
59  
60
- Pragmatic effectiveness trial of a mental health intervention in primary care.
  - Intervention included Maori cultural adaptations.
  - Recruitment issues limit strength of results.
  - Intervention was applied to more severe mental health presentations that it was developed for.
  - GP degree of adherence to the intervention tool is unclear.

## 61 **Keywords**

62  
63  
64  
65  
66  
67  
68  
69  
70  
71  
72  
73  
74  
75  
76  
77  
78  
79  
80  
81  
82  
83  
84  
85  
86  
87  
88  
89  
90  
91  
92  
93  
94  
95  
96  
97  
98  
99  
100  
101  
102  
103  
104  
105  
106  
107  
108  
109  
110  
111  
112  
113  
114  
115  
116  
117  
118  
119  
120  
121  
122  
123  
124  
125  
126  
127  
128  
129  
130  
131  
132  
133  
134  
135  
136  
137  
138  
139  
140  
141  
142  
143  
144  
145  
146  
147  
148  
149  
150  
151  
152  
153  
154  
155  
156  
157  
158  
159  
160  
161  
162  
163  
164  
165  
166  
167  
168  
169  
170  
171  
172  
173  
174  
175  
176  
177  
178  
179  
180  
181  
182  
183  
184  
185  
186  
187  
188  
189  
190  
191  
192  
193  
194  
195  
196  
197  
198  
199  
200  
201  
202  
203  
204  
205  
206  
207  
208  
209  
210  
211  
212  
213  
214  
215  
216  
217  
218  
219  
220  
221  
222  
223  
224  
225  
226  
227  
228  
229  
230  
231  
232  
233  
234  
235  
236  
237  
238  
239  
240  
241  
242  
243  
244  
245  
246  
247  
248  
249  
250  
251  
252  
253  
254  
255  
256  
257  
258  
259  
260  
261  
262  
263  
264  
265  
266  
267  
268  
269  
270  
271  
272  
273  
274  
275  
276  
277  
278  
279  
280  
281  
282  
283  
284  
285  
286  
287  
288  
289  
290  
291  
292  
293  
294  
295  
296  
297  
298  
299  
300  
301  
302  
303  
304  
305  
306  
307  
308  
309  
310  
311  
312  
313  
314  
315  
316  
317  
318  
319  
320  
321  
322  
323  
324  
325  
326  
327  
328  
329  
330  
331  
332  
333  
334  
335  
336  
337  
338  
339  
340  
341  
342  
343  
344  
345  
346  
347  
348  
349  
350  
351  
352  
353  
354  
355  
356  
357  
358  
359  
360  
361  
362  
363  
364  
365  
366  
367  
368  
369  
370  
371  
372  
373  
374  
375  
376  
377  
378  
379  
380  
381  
382  
383  
384  
385  
386  
387  
388  
389  
390  
391  
392  
393  
394  
395  
396  
397  
398  
399  
400  
401  
402  
403  
404  
405  
406  
407  
408  
409  
410  
411  
412  
413  
414  
415  
416  
417  
418  
419  
420  
421  
422  
423  
424  
425  
426  
427  
428  
429  
430  
431  
432  
433  
434  
435  
436  
437  
438  
439  
440  
441  
442  
443  
444  
445  
446  
447  
448  
449  
450  
451  
452  
453  
454  
455  
456  
457  
458  
459  
460  
461  
462  
463  
464  
465  
466  
467  
468  
469  
470  
471  
472  
473  
474  
475  
476  
477  
478  
479  
480  
481  
482  
483  
484  
485  
486  
487  
488  
489  
490  
491  
492  
493  
494  
495  
496  
497  
498  
499  
500  
501  
502  
503  
504  
505  
506  
507  
508  
509  
510  
511  
512  
513  
514  
515  
516  
517  
518  
519  
520  
521  
522  
523  
524  
525  
526  
527  
528  
529  
530  
531  
532  
533  
534  
535  
536  
537  
538  
539  
540  
541  
542  
543  
544  
545  
546  
547  
548  
549  
550  
551  
552  
553  
554  
555  
556  
557  
558  
559  
560  
561  
562  
563  
564  
565  
566  
567  
568  
569  
570  
571  
572  
573  
574  
575  
576  
577  
578  
579  
580  
581  
582  
583  
584  
585  
586  
587  
588  
589  
590  
591  
592  
593  
594  
595  
596  
597  
598  
599  
600  
601  
602  
603  
604  
605  
606  
607  
608  
609  
610  
611  
612  
613  
614  
615  
616  
617  
618  
619  
620  
621  
622  
623  
624  
625  
626  
627  
628  
629  
630  
631  
632  
633  
634  
635  
636  
637  
638  
639  
640  
641  
642  
643  
644  
645  
646  
647  
648  
649  
650  
651  
652  
653  
654  
655  
656  
657  
658  
659  
660  
661  
662  
663  
664  
665  
666  
667  
668  
669  
670  
671  
672  
673  
674  
675  
676  
677  
678  
679  
680  
681  
682  
683  
684  
685  
686  
687  
688  
689  
690  
691  
692  
693  
694  
695  
696  
697  
698  
699  
700  
701  
702  
703  
704  
705  
706  
707  
708  
709  
710  
711  
712  
713  
714  
715  
716  
717  
718  
719  
720  
721  
722  
723  
724  
725  
726  
727  
728  
729  
730  
731  
732  
733  
734  
735  
736  
737  
738  
739  
740  
741  
742  
743  
744  
745  
746  
747  
748  
749  
750  
751  
752  
753  
754  
755  
756  
757  
758  
759  
760  
761  
762  
763  
764  
765  
766  
767  
768  
769  
770  
771  
772  
773  
774  
775  
776  
777  
778  
779  
780  
781  
782  
783  
784  
785  
786  
787  
788  
789  
790  
791  
792  
793  
794  
795  
796  
797  
798  
799  
800  
801  
802  
803  
804  
805  
806  
807  
808  
809  
810  
811  
812  
813  
814  
815  
816  
817  
818  
819  
820  
821  
822  
823  
824  
825  
826  
827  
828  
829  
830  
831  
832  
833  
834  
835  
836  
837  
838  
839  
840  
841  
842  
843  
844  
845  
846  
847  
848  
849  
850  
851  
852  
853  
854  
855  
856  
857  
858  
859  
860  
861  
862  
863  
864  
865  
866  
867  
868  
869  
870  
871  
872  
873  
874  
875  
876  
877  
878  
879  
880  
881  
882  
883  
884  
885  
886  
887  
888  
889  
890  
891  
892  
893  
894  
895  
896  
897  
898  
899  
900  
901  
902  
903  
904  
905  
906  
907  
908  
909  
910  
911  
912  
913  
914  
915  
916  
917  
918  
919  
920  
921  
922  
923  
924  
925  
926  
927  
928  
929  
930  
931  
932  
933  
934  
935  
936  
937  
938  
939  
940  
941  
942  
943  
944  
945  
946  
947  
948  
949  
950  
951  
952  
953  
954  
955  
956  
957  
958  
959  
960  
961  
962  
963  
964  
965  
966  
967  
968  
969  
970  
971  
972  
973  
974  
975  
976  
977  
978  
979  
980  
981  
982  
983  
984  
985  
986  
987  
988  
989  
990  
991  
992  
993  
994  
995  
996  
997  
998  
999  
1000

Mental Health, Primary Care

## Introduction

Mental health is major aspect of health and poor mental health is highly prevalent in the general community. Consistent with international findings, just under 40% of the New Zealand (NZ) population had met criteria for a diagnosable mental disorder during their life, and roughly a fifth had experienced a mental disorder in the previous year (Oakley-Browne, Wells, & Scott, 2006).

There is also considerable international concern about the healthcare burden arising from mental health problems and substance abuse (Greenberg et al., 2003; Horton, 2012; Wang, Simon, & Kessler, 2003), with the World Mental Health Survey (of 21 countries) suggesting that only 41% of people with depression received treatment that met even minimal standards (Thornicroft et al., 2017).

In NZ, as in other OECD countries, mental health problems are common presentations in primary care. Around one-quarter of primary care patients (26.5% and 29.8% of men and women, respectively), attending their general practice in NZ met criteria for a mild-moderate mental health disorder and an estimated 50-70% of mental health concerns are managed exclusively at the primary care level, since secondary care services have become more targeted towards severe and enduring mental illness in recent years (The MaGPIe Research Group, 2003).

Internationally there is a call for psychological therapies to be more widely available in primary care (Layard et al., 2006), and growing unease about increasing levels of antidepressant medications being prescribed compared with the limited resources available for psychological interventions (Hollingshurst, Kessler, Peters, & Gunnell, 2005). However, treatment options at the primary care level are limited, with GPs expressing concerns about gaps in services for patients with mild-moderate mental health presentations and a desire to offer a brief intervention themselves (Dowell et al., 2008; Garrett et al., 2007). In NZ, GPs reported that as few as 22% of patients with mild-moderate mental health syndromes receive any formal help (The MaGPIe Research Group, 2006).

Such patient presentations often comprise sub-threshold syndromes (American Psychiatric Association, 2013; Mathieson, Collings, & Dowell, 2009), and cases of mild-moderate common mental disorder. These are combinations of problems such as anxiety, depression, substance use and interpersonal problems that do not meet the threshold for disorder in

1  
2  
3 standard diagnostic systems such as DSM-5. Often these arise in the context of social  
4 problems or family or economic stress. In NZ, 36% of general practice attendees report  
5 anxiety, depression or substance-use, or a combination of these issues (The MaGPIe Research  
6 Group, 2003). Such presentations can be associated with significant impairment in  
7 functioning and suffering (Collings & MaGPIe Research Group, 2005; Wagner et al., 2000),  
8 with some going on to develop severe depression (R. Kessler, Zhao, Blazer, & Swartz, 1997;  
9 Sadek & Bona, 2000). Intervention may be warranted for up to 80% of those affected (The  
10 MaGPIe Research Group, 2006; Wagner et al., 2000), but referral out of the practice can be  
11 problematic due to referral eligibility criteria, waiting times, administrative issues and cost  
12 (Dew, Dowell, McLeod, Collings, & Bushnell, 2005; Dowell et al., 2007, 2008).

13  
14  
15  
16  
17  
18  
19  
20 Increasing knowledge of the burden of mild-moderate disorder led to the development of a  
21 platform of Primary Mental Health Initiatives in NZ, which included some increase in access  
22 to psychological therapies and extended consultations with GPs. The inclusion criteria for  
23 these initiatives, however, mean that only up to 15% of the population can gain access to  
24 those services (Dowell et al., 2008).

25  
26  
27  
28  
29 This service-gap led us to develop a GP delivered ultra-brief intervention (UBI), with  
30 development and refinement based on service user feedback (Mathieson et al., 2013). This  
31 model has the advantages of avoiding the need for referral on to an expensive professional,  
32 such as a psychologist, of being easily accessible to patients, and of potentially building on  
33 existing trusted relationships. This fits with the movement towards alternative methods of  
34 service delivery for mild to moderate mental health presentations, often termed 'low  
35 intensity' interventions. These interventions often include guided self-help, bibliotherapy  
36 and computerised delivery of care, with current evidence suggesting that even minimal  
37 therapist contact leads to better outcomes than self-help alone (Gellatly et al., 2007; Gellatly  
38 et al., 2017; Jorm & Griffiths, 2006; D. Kessler et al., 2009).

39  
40  
41  
42  
43  
44  
45  
46  
47  
48  
49  
50  
51  
52  
53  
54  
55  
56  
57  
58  
59  
60  
61  
62  
63  
64  
65  
66  
67  
68  
69  
70  
71  
72  
73  
74  
75  
76  
77  
78  
79  
80  
81  
82  
83  
84  
85  
86  
87  
88  
89  
90  
91  
92  
93  
94  
95  
96  
97  
98  
99  
100  
101  
102  
103  
104  
105  
106  
107  
108  
109  
110  
111  
112  
113  
114  
115  
116  
117  
118  
119  
120  
121  
122  
123  
124  
125  
126  
127  
128  
129  
130  
131  
132  
133  
134  
135  
136  
137  
138  
139  
140  
141  
142  
143  
144  
145  
146  
147  
148  
149  
150  
151  
152  
153  
154  
155  
156  
157  
158  
159  
160  
161  
162  
163  
164  
165  
166  
167  
168  
169  
170  
171  
172  
173  
174  
175  
176  
177  
178  
179  
180  
181  
182  
183  
184  
185  
186  
187  
188  
189  
190  
191  
192  
193  
194  
195  
196  
197  
198  
199  
200  
201  
202  
203  
204  
205  
206  
207  
208  
209  
210  
211  
212  
213  
214  
215  
216  
217  
218  
219  
220  
221  
222  
223  
224  
225  
226  
227  
228  
229  
230  
231  
232  
233  
234  
235  
236  
237  
238  
239  
240  
241  
242  
243  
244  
245  
246  
247  
248  
249  
250  
251  
252  
253  
254  
255  
256  
257  
258  
259  
260  
261  
262  
263  
264  
265  
266  
267  
268  
269  
270  
271  
272  
273  
274  
275  
276  
277  
278  
279  
280  
281  
282  
283  
284  
285  
286  
287  
288  
289  
290  
291  
292  
293  
294  
295  
296  
297  
298  
299  
300  
301  
302  
303  
304  
305  
306  
307  
308  
309  
310  
311  
312  
313  
314  
315  
316  
317  
318  
319  
320  
321  
322  
323  
324  
325  
326  
327  
328  
329  
330  
331  
332  
333  
334  
335  
336  
337  
338  
339  
340  
341  
342  
343  
344  
345  
346  
347  
348  
349  
350  
351  
352  
353  
354  
355  
356  
357  
358  
359  
360  
361  
362  
363  
364  
365  
366  
367  
368  
369  
370  
371  
372  
373  
374  
375  
376  
377  
378  
379  
380  
381  
382  
383  
384  
385  
386  
387  
388  
389  
390  
391  
392  
393  
394  
395  
396  
397  
398  
399  
400  
401  
402  
403  
404  
405  
406  
407  
408  
409  
410  
411  
412  
413  
414  
415  
416  
417  
418  
419  
420  
421  
422  
423  
424  
425  
426  
427  
428  
429  
430  
431  
432  
433  
434  
435  
436  
437  
438  
439  
440  
441  
442  
443  
444  
445  
446  
447  
448  
449  
450  
451  
452  
453  
454  
455  
456  
457  
458  
459  
460  
461  
462  
463  
464  
465  
466  
467  
468  
469  
470  
471  
472  
473  
474  
475  
476  
477  
478  
479  
480  
481  
482  
483  
484  
485  
486  
487  
488  
489  
490  
491  
492  
493  
494  
495  
496  
497  
498  
499  
500  
501  
502  
503  
504  
505  
506  
507  
508  
509  
510  
511  
512  
513  
514  
515  
516  
517  
518  
519  
520  
521  
522  
523  
524  
525  
526  
527  
528  
529  
530  
531  
532  
533  
534  
535  
536  
537  
538  
539  
540  
541  
542  
543  
544  
545  
546  
547  
548  
549  
550  
551  
552  
553  
554  
555  
556  
557  
558  
559  
560  
561  
562  
563  
564  
565  
566  
567  
568  
569  
570  
571  
572  
573  
574  
575  
576  
577  
578  
579  
580  
581  
582  
583  
584  
585  
586  
587  
588  
589  
590  
591  
592  
593  
594  
595  
596  
597  
598  
599  
600  
601  
602  
603  
604  
605  
606  
607  
608  
609  
610  
611  
612  
613  
614  
615  
616  
617  
618  
619  
620  
621  
622  
623  
624  
625  
626  
627  
628  
629  
630  
631  
632  
633  
634  
635  
636  
637  
638  
639  
640  
641  
642  
643  
644  
645  
646  
647  
648  
649  
650  
651  
652  
653  
654  
655  
656  
657  
658  
659  
660  
661  
662  
663  
664  
665  
666  
667  
668  
669  
670  
671  
672  
673  
674  
675  
676  
677  
678  
679  
680  
681  
682  
683  
684  
685  
686  
687  
688  
689  
690  
691  
692  
693  
694  
695  
696  
697  
698  
699  
700  
701  
702  
703  
704  
705  
706  
707  
708  
709  
710  
711  
712  
713  
714  
715  
716  
717  
718  
719  
720  
721  
722  
723  
724  
725  
726  
727  
728  
729  
730  
731  
732  
733  
734  
735  
736  
737  
738  
739  
740  
741  
742  
743  
744  
745  
746  
747  
748  
749  
750  
751  
752  
753  
754  
755  
756  
757  
758  
759  
760  
761  
762  
763  
764  
765  
766  
767  
768  
769  
770  
771  
772  
773  
774  
775  
776  
777  
778  
779  
780  
781  
782  
783  
784  
785  
786  
787  
788  
789  
790  
791  
792  
793  
794  
795  
796  
797  
798  
799  
800  
801  
802  
803  
804  
805  
806  
807  
808  
809  
810  
811  
812  
813  
814  
815  
816  
817  
818  
819  
820  
821  
822  
823  
824  
825  
826  
827  
828  
829  
830  
831  
832  
833  
834  
835  
836  
837  
838  
839  
840  
841  
842  
843  
844  
845  
846  
847  
848  
849  
850  
851  
852  
853  
854  
855  
856  
857  
858  
859  
860  
861  
862  
863  
864  
865  
866  
867  
868  
869  
870  
871  
872  
873  
874  
875  
876  
877  
878  
879  
880  
881  
882  
883  
884  
885  
886  
887  
888  
889  
890  
891  
892  
893  
894  
895  
896  
897  
898  
899  
900  
901  
902  
903  
904  
905  
906  
907  
908  
909  
910  
911  
912  
913  
914  
915  
916  
917  
918  
919  
920  
921  
922  
923  
924  
925  
926  
927  
928  
929  
930  
931  
932  
933  
934  
935  
936  
937  
938  
939  
940  
941  
942  
943  
944  
945  
946  
947  
948  
949  
950  
951  
952  
953  
954  
955  
956  
957  
958  
959  
960  
961  
962  
963  
964  
965  
966  
967  
968  
969  
970  
971  
972  
973  
974  
975  
976  
977  
978  
979  
980  
981  
982  
983  
984  
985  
986  
987  
988  
989  
990  
991  
992  
993  
994  
995  
996  
997  
998  
999  
1000

UBI was feasibility tested with a group of 16 patients and then adapted for Maori (the  
indigenous people of New Zealand) and feasibility tested with a group of 9 patients (Collings  
et al., 2012; Mathieson, Mihaere, Collings, Dowell, & Stanley, 2012). Based on questionnaire  
feedback, clinician and patient satisfaction ratings for both feasibility studies were very  
positive in terms of relevance and acceptability. The psychological well-being of the patients,  
as measured by the Kessler-10 (K10) (R. Kessler et al., 2002), was also significantly  
improved post-intervention (at 3 month follow-up) for both Maori and non-Maori, although

1  
2  
3 there was no control group (Collings et al., 2012; Mathieson et al., 2012). Based on these  
4 initial findings we designed a cluster randomized controlled trial to measure the effectiveness  
5 of UBI.  
6  
7

8 The aims of the study were to compare patient-level outcomes on (1) mental health state (as  
9 measured by K10 scores) at 6 months between UBI and practice as usual (PAU) study arms  
10 (primary outcome) and (2) levels of distress (depression and anxiety) and functioning (work,  
11 social and relationship) at 8 weeks and 3 months between UBI and PAU study arms (as  
12 secondary outcomes).  
13  
14  
15

## 16 **Methods**

17  
18  
19 A protocol for this study has been previously published, and includes description of planned  
20 analyses (Collings et al., 2015). The trial was registered prior to recruitment commencing  
21 with the Australia New Zealand Clinical Trials Registry (registration  
22 ACTRN12613000041752.)  
23  
24  
25

### 26 **Design**

27  
28  
29 We used a pragmatic two-arm single blinded, cluster randomised controlled trial of UBI  
30 compared with PAU, in a primary care setting. GPs were randomised by practice to  
31 exclusively deliver either UBI or PAU to all their recruited patients. GPs were treated as the  
32 clusters in the study design (while there was be clustering by practice, the GPs were treated  
33 as the unit of analysis as practitioner attributes were anticipated to be a higher source of  
34 variability in outcomes.) Analysis followed an intention-to-treat approach.  
35  
36  
37  
38

### 39 **Setting**

40  
41 The study was conducted in general practices in the greater Wellington region, New Zealand.  
42 This included practices in both city and semi-rural settings, serving populations from a wide  
43 range of socio-economic backgrounds. Recruitment took place between 1/5/2013 and  
44 1/7/2016. The trial ended prior to achieving the final sample size when funding for data  
45 collection was exhausted.  
46  
47  
48  
49  
50  
51  
52  
53  
54  
55  
56  
57  
58  
59  
60

## Participants

This was a pragmatic trial supported within existing treatment services. GPs were eligible to participate if they were currently working in a practice that was part of the Compass Health Primary Health Organisation (PHO) which covers the greater Wellington region.

Patients were eligible if aged between 18 and 65 and identified by their GP in a routine appointment as experiencing stress or distress. To allow comparison of UBI with a PAU arm, all patients needed to meet access criteria of a local partner Primary Health Organisation (PHO) to psychological therapies. These groups were youth (defined as 18-24-years old), and individuals aged 25 years or older who were identified as low income, or Māori or Pacific Island ethnicity.

Patients were required to score 35 or less on the Kessler Psychological Distress Scale (K10) (Andrews & Slade, 2001; R. Kessler et al., 2002) during their initial GP consultation, with no lower cut-off on this score. The present study followed previous study protocols (Collings et al., 2012; Mathieson et al., 2012) by including scores between 30 and 35 on the K10 as indicative of mild to moderate levels of psychological distress rather than major psychiatric disorder. Individuals taking anti-depressant or other psychiatric medications were eligible to participate in the study.

Patients were excluded if they lacked fluency in English (as the intervention is an English-language based 'talking therapy'); had significant levels of cognitive impairment as determined by the GP; or had reported recent or acute suicidal ideation (i.e., within the previous 2 weeks). Chronic low level suicidality did not exclude an individual from participating. However, GPs were informed of patients who had high scores or suicidality at screening, or for whom referral to appropriate (secondary) mental health services by GPs was indicated, and these patients were not eligible to participate further in the study.

Inclusion criteria were based on the access criteria of a local partner primary health organisation (PHO) to psychological therapies. These criteria were youth (defined as 18-24 years old), or individuals aged 25 years or older with low income, or Māori or Pacific Island heritage.



### **Recruitment of practices and GPs**

Initial recruitment of practices was supported by the partner PHO. GPs were identified using primary health organisation and practice lists. All of the practices contracted under the partner PHO were contacted (N=52) and invited to participate in the study, and an effort was made to contact all of the GPs within these practices by email, telephone or in person. A total of 23 practices initially consented to participate in the study and a further 18 were recruited during the course of the study. Two practices merged and three withdrew (in each case the single participating GP left the practice) leaving a total of 37 practices involved in the study.

### **Randomisation of practices to study arms**

Consenting practices were randomised to provide either UBI or PAU to eligible patients. Randomisation was conducted at the practice level to reduce the risk of contamination if GPs from the same practice were assigned to opposite study arms. To ensure approximately equal numbers of GPs per study arm, randomisation of practices was conducted within five strata, according to the number of participating GPs (one/two/three/four/more than four). An additional two practices dedicated to youth health that were not part of the partner PHO were included and randomised into each arm of the study (i.e. these two practices formed their own stratum). Randomisation was performed following individual GP consent as a single step, with randomisation conducted by the project biostatistician (JS).

GPs randomised to the UBI study arm completed a single two-hour training session (as previously described (Collings et al., 2012)). Due to the training nature of the intervention, it was not possible to blind GPs as to their study arm allocation.

### **Recruitment procedures**

GPs identified patients with common mental health problems who might fulfil study criteria during routine appointments. These patients were screened by the GP for eligibility (using the K10), and referred to the study team. A research assistant then contacted potential participating patients, met with them in person where possible to explain the study, confirm eligibility, obtain consent to participate, and collect pre-treatment (baseline) data. Measures were then collected by mail or email at post-treatment (8 weeks, 3 months and 6 months). Patients received compensation (NZ \$30 [US\$21] vouchers, and entry into a draw for an

1  
2  
3 iPad) following the completion of the final questionnaire, to recompense for time and effort  
4 in participating in the study.  
5  
6

### 7 8 **Intervention**

9  
10 UBI is guided self-management programme which can be delivered by a GP after a single  
11 two-hour training session using a treatment manual based on structured problem solving,  
12 motivational interviewing and cognitive behaviour therapy (supported with self-help booklets  
13 on relationships, bodily stress, breaking habits and stress management).  
14  
15

16  
17 Patients who consented and completed the intake data collection (K10 and baseline  
18 measurements) received the GP-led intervention in three short, structured face-to-face  
19 sessions (one 30 and two 15 minute sessions) over a five to six week period. Relevant  
20 booklets were provided to the patient after the first session, to be used in the following  
21 session. The study protocol allowed for patients in either study arm to alter their treatment as  
22 needed (e.g. access other talking therapies, or commence mental health medications). Patients  
23 were blinded as to their study allocation in that patients in PAU practices were not informed  
24 that the UBI was offered in practices randomised to deliver UBI. They were simply told that  
25 the study was looking at the effectiveness of PAU.  
26  
27  
28  
29  
30  
31

### 32 33 **Practice as usual**

34  
35 Patients in the PAU study arm received GP support delivered according to their practice as  
36 usual (and available existing services). PAU typically consists of supportive counselling in a  
37 15 minute face-to-face consultation, the provision of psychotropic medication, referral to  
38 psychological or other counselling options, or referral to relevant community services.  
39  
40  
41  
42

### 43 44 **Patient characteristics**

45  
46 Patients are described on the basis of age, gender, prioritised ethnicity and NZiDep, a NZ-  
47 developed index (Ministry of Health, 2004) of individual-level socioeconomic deprivation.  
48 GPs in practices assigned to the PAU study arm received optional training in the intervention  
49 at the end of the study.  
50  
51  
52  
53  
54  
55  
56  
57  
58  
59  
60

### **Patient and Public Involvement**

This study had an academic mental health consumer as part of the research team at the feasibility stage, and designed the intervention based on feedback from a focus group process with potential patient users of the mental health intervention which asked what characteristics such an intervention would need to have. This collaborative process is fully described in (Mathieson et al., 2013). This RCT did not have academic consumer or patient involvement in the recruitment to and conduct of the study and the burden of the intervention was not assessed by the patients. Results of this study will be disseminated by email to GP participants who indicated they wanted them on the consent form.

### **Outcome measures**

The primary outcome measure was the K10 scale (Andrews & Slade, 2001; R. Kessler et al., 2002) score at 6 months (adjusted for score at baseline: see analysis). The K10 is widely used as a clinical outcome measure in Primary Care and General Practice in NZ (Dowell et al., 2008). All analyses were conducted to look at patient-level outcomes.

Secondary outcomes were:

- 1) Hospital Anxiety and Depression Scale (HADS), which measures the severity of depressive and anxiety symptoms in outpatient hospital settings (Zigmond & Snaith, 1983). Reductions in HADS score indicate reduced anxiety and depression.
- 2) Comparison of K10 scores by treatment group at 8 weeks and 12 weeks, adjusted for baseline scores (to capture short and medium term effectiveness).
- 3) Work and Social Adjustment Scale (Mundt, Marks, Shear, & Greist, 2002), a measure of work, social and relationship functioning administered at baseline, 8, 12 and 26 weeks.

Outcomes were measured at the same time points in both UBI and PAU groups (baseline, and at 8, 12, and 26 weeks following baseline)

### **Statistical methods**

#### **Sample size and Power analysis**

Sample size for the cluster randomised trial was calculated using a simulation method, using standard deviations of patient outcomes from the UBI feasibility study (standard deviation of post-treatment scores = 7.5; unpublished data). To detect a difference in K10 improvement

1  
2  
3 scores of 6 points in the UBI arm compared with 2 points in the control arm (at 80% power  
4 and  $\alpha = 0.05$ ) would require 15 GPs per arm recruiting eight completing patients each on  
5 average ( $n=240$  total with complete data). Adjusting for loss to follow-up of 20% gave a  
6 recruitment target of ten patients per GP. The simulation settings roughly correspond to an  
7 intraclass correlation (ICC) of 0.15 for considering clustering of patient scores by GP  
8 (equivalent to the ICC from the feasibility study; unpublished data). Power analysis for the  
9 secondary HADS outcome indicated 80% power to detect a difference of 3.2 points between  
10 groups (based on a standard deviation of approximately 6 (Spinoven et al., 1997)) assuming  
11 a similar ICC for the HADS scale as for the K10 measure (empirical data were not available).  
12  
13  
14  
15  
16  
17  
18  
19

### 20 **Data Analysis**

21  
22  
23 The statistician was blinded to the intervention or control status of participants (both practices  
24 and patients) during conduct of the study and analysis. Results were unblinded once analysis  
25 was complete. Data processing and analysis were conducted in R 3.2.3 (R Institute, Vienna)  
26 with linear mixed models fit using the lmer package (Bates, Maechler, Bolker, & Walker,  
27 2015).  
28  
29  
30  
31

32  
33 For the primary outcome, K10 scores at 6 months were compared between the intervention  
34 and control groups using mixed linear models (comparing post-intervention scores between  
35 groups, adjusting for intake score as a covariate, and treating GP clusters as random slope  
36 effects). Analysis was conducted on an intention-to-treat basis according to the study arm for  
37 each patient at entry into the study. Analyses were adjusted for all other baseline covariates  
38 (age, gender, ethnicity, educational level, and NZiDep).  
39  
40  
41  
42  
43

44 Missing data were handled through the mixed linear models approach to the data, which  
45 allows for patients with missing data on the final outcome to be included in analyses, which  
46 in effect estimates a final outcome value conditional on the observed data at other follow-up  
47 times (i.e. validity being predicated under the assumption that the missing observations are  
48 missing at random, conditional on the observed data (Beunckens, Molenberghs, & Kenward,  
49 2005; DeSouza, Legedza, & Sankoh, 2009)). The null hypothesis for this test was that the  
50 K10 scores at 26 weeks (adjusted for baseline score) were not different for the intervention  
51 and control groups.  
52  
53  
54  
55  
56  
57  
58  
59  
60

1  
2  
3  
4 For the secondary analysis, differences in mean scores on the K10 outcome were reported at  
5 8 weeks and 3 months (using the same methods as above, within the mixed linear models  
6 framework). Analysis of the HADS and WSAS scores at 8 weeks, 3 months and 6 months  
7 utilised the same methods as for the K10 outcome.  
8  
9

10  
11  
12 Intra-class correlation coefficient (ICC) values were calculated for each outcome measure as  
13 a summary of clustering according to GPs. Details of the calculation methods are provided in  
14 the Supplementary Materials.  
15  
16

17  
18  
19 Additional treatments received during the trial (including medication and talking therapies)  
20 were analysed by study arm, based on self-report data collected at the 6 month follow-up.  
21 This descriptive analysis was not specified in the study protocol.  
22  
23

### 24 25 **Confidentiality and data management**

26  
27  
28 Consenting patients had their rights explained along with provision for data confidentiality.  
29 Paper and digital copies of the data were secured in locked storage on the premises of the  
30 University of Otago, Wellington. The questionnaire data was de-identified and entered into a  
31 spreadsheet for subsequent analysis.  
32  
33

### 34 35 **Ethics approval**

36  
37  
38 Ethical approval was received from the Health and Disability Ethics Committees (HDEC),  
39 Ministry of Health (Northern B Health and Disability ethics committee 12/NTB/2).  
40  
41

42  
43  
44 Adverse events were not anticipated in this trial, and arrangements were made to feedback  
45 clinical information to GPs if deemed necessary (e.g., high K10 scores or concerning self-  
46 reported statements about a patient's safety) in the course of data collection.  
47  
48

## 49 **Results**

### 50 51 **GP Participants**

52  
53  
54 A total of 41 practices agreed to participate, with a total of 112 individual GPs consenting to  
55 take part in the study (n=62 for UBI, and n=50 for PAU). Of these GPs, 31 recruited at least  
56  
57

one patient into the study in the UBI arm, and 21 recruited at least one patient in the PAU arm (see Supplementary Table R1).

### Patient Participants

Figure 1 summarises the flow of patients into the study and participation in the interventions and follow-up. A total of 198 patients were referred into the study, and 160 met eligibility criteria and completed baseline assessments. The vast majority of these completed at least one post-intervention follow-up (70 / 85 in the UBI arm [82%]; and 69/75 in the PAU group [92%]) and hence contributed to the data analysis.

<Insert figure 1 about here>

### Baseline data

Baseline sociodemographic characteristics of patients are presented in Table 1 for the two study arms. The two groups were roughly comparable at baseline, with a few more male participants and a slightly younger age profile in the UBI arm, but with a greater representation of females in the study overall.

Table 1. Patient sociodemographic profile by study arm.

| Variable          | Level              | Study Group        |                    |
|-------------------|--------------------|--------------------|--------------------|
|                   |                    | UBI (Total n = 85) | PAU (Total n = 75) |
|                   |                    | n (%)              | n (%)              |
| Gender            |                    |                    |                    |
|                   | Female*            | 56 (65.9)          | 57 (76.0)          |
|                   | Male               | 29 (34.1)          | 18 (24.0)          |
| Age Group         |                    |                    |                    |
|                   | 15-24              | 55 (64.7)          | 37 (49.3)          |
|                   | 25-34              | 16 (18.8)          | 15 (20.0)          |
|                   | 35-44              | 3 (3.5)            | 13 (17.3)          |
|                   | 45-54              | 5 (5.9)            | 6 (8.0)            |
|                   | 55+                | 6 (7.1)            | 4 (5.3)            |
| Ethnicity         |                    |                    |                    |
|                   | NZE/Other          | 61 (71.8)          | 54 (72.0)          |
|                   | Māori              | 19 (22.4)          | 14 (18.7)          |
|                   | Pacific            | 4 (4.7)            | 2 (2.7)            |
|                   | Asian              | 1 (1.2)            | 5 (6.7)            |
| Highest education |                    |                    |                    |
|                   | At least secondary | 78 (91.8)          | 71 (94.7)          |
|                   | No secondary level | 7 (8.2)            | 4 (5.3)            |
| NZiDep            |                    |                    |                    |

|                    |           |           |
|--------------------|-----------|-----------|
| 0 (least deprived) | 18 (21.2) | 11 (14.7) |
| 1                  | 16 (18.8) | 17 (22.7) |
| 2                  | 15 (17.6) | 11 (14.7) |
| 3                  | 10 (11.8) | 10 (13.3) |
| 4                  | 9 (10.6)  | 12 (16.0) |
| 5 (most deprived)  | 17 (20.0) | 14 (18.7) |

\* Includes one individual self-identifying as Female (transgender)

Mean baseline scores on the outcome measures were also similar between the two groups (Table 2, showing means and standard deviations). Boxplots of the distribution of baseline scores on each outcome scale are given in Supplementary Figure R1.

Table 2. Mean (standard deviation) of baseline scores for outcome measures by study arm

| Outcome variable     | Study Group        |                    |
|----------------------|--------------------|--------------------|
|                      | UBI (Total n = 85) | PAU (Total n = 75) |
|                      | mean (sd)          | mean (sd)          |
| K10*                 | 29.5 (6.2)         | 28.1 (5.7)         |
| HADS – total         | 20.6 (5.9)         | 19.5 (5.1)         |
| HADS – anxiety       | 12.1 (3.6)         | 11.9 (3.5)         |
| HADS – depression    | 8.5 (3.5)          | 7.7 (3.6)          |
| WSAS                 | 23.0 (8.2)         | 19.6 (8.5)         |
| Health Thermometer** | 55.4 (19.9)        | 58.8 (18.7)        |

\* One patient in PAU group missing baseline value.

\*\* Higher scores on the health thermometer indicate better health.

### Health Outcomes at Follow-up

For the K10 primary outcome at 6 months the mean difference for UBI compared to PAU arm favoured the PAU arm (mean difference = 1.68, 95% CI 1.18, 4.55;  $p = 0.255$ ), as shown in Table 3 (where positive differences indicate a better outcome for the PAU than UBI arm) While this result indicated no significant difference in K10 scores between the UBI and PAU arms (see Figure 2), each group had a reasonable improvement in K10 score from baseline (see Supplementary Table R1: for the PAU group mean improvement = 7.6, 95% CI 5.5, 9.6; and for the UBI group mean improvement = 5.9, 95% CI 4.0, 7.8).

Table 3. Mean difference in primary and secondary outcomes

| Outcome variable     | Mean difference (UBI minus PAU)* |       |                    |       |                     |       |
|----------------------|----------------------------------|-------|--------------------|-------|---------------------|-------|
|                      | 8 weeks                          |       | 3 months           |       | 6 months            |       |
|                      | mean diff (95% CI)               | p     | mean diff (95% CI) | p     | mean diff (95% CI)  | p     |
| Primary outcomes**   |                                  |       |                    |       |                     |       |
| K10                  | -0.19 (-2.55, 2.16)              | 0.872 | 1.53 (-0.79, 3.84) | 0.203 | 1.68 (-1.18, 4.55)  | 0.255 |
| HADS                 | 0.57 (-1.68, 2.82)               | 0.620 | 0.86 (-1.38, 3.10) | 0.456 | 1.85 (-0.62, 4.31)  | 0.149 |
| Secondary outcomes** |                                  |       |                    |       |                     |       |
| HADS-A               | 0.27 (-1.02, 1.56)               | 0.684 | 0.70 (-0.60, 2.00) | 0.296 | 1.05 (-0.39, 2.50)  | 0.161 |
| HADS-D               | 0.39 (-0.82, 1.60)               | 0.533 | 0.24 (-0.96, 1.44) | 0.701 | 0.88 (-0.38, 2.14)  | 0.178 |
| WSAS                 | 0.49 (-2.40, 3.38)               | 0.740 | 1.32 (-1.58, 4.22) | 0.377 | 0.45 (-2.47, 3.37)  | 0.762 |
| Health Thermometer   | 2.84 (-3.64, 9.31)               | 0.395 | 1.90 (-4.59, 8.39) | 0.569 | 4.93 (-1.77, 11.62) | 0.156 |

\* Positive differences indicate better improvement in PAU than UBI arm.

\*\* Number of participants contributing data to each analysis: UBI n = 70, PAU n = 69 (except for K10: PAU n = 68)



1  
2  
3 <insert Figure 2 about here>  
4  
5  
6

7 The mean difference on the HADS measure at 6 months between UBI and PAU measures  
8 was 1.85 (95% CI = -0.62, 4.31,  $p = 0.149$ ; see Table 3), though both groups again showed an  
9 improvement in mean score from baseline (Supplementary Table R1). Mean scores at each  
10 follow-up time are presented in Figure 3.  
11

12  
13  
14 <insert Figure 3 about here>  
15  
16  
17

18 Similarly, for all secondary outcome measures (HADS Anxiety and Depression sub-scales,  
19 WSAS, and Health Thermometer), the difference in outcomes at 6 months showed no  
20 significant advantage for either UBI or PAU measures (with relatively broad confidence  
21 intervals for these differences: see Table 3.)  
22  
23  
24

25  
26 Estimates of secondary analyses of outcomes at earlier follow-up times (8 weeks and 3  
27 months) are also presented in Table 3. Differences between UBI and PAU were generally  
28 most pronounced at the final follow-up (6 months) compared to the interim follow-ups.  
29 Trajectories for mean scores in each group are presented in Supplementary Figure R2,  
30 Supplementary Figure R3, Supplementary Figure R4 and Supplementary Figure R5.  
31  
32  
33

### 34 35 **Ancillary analyses** 36

37 Information on types of additional treatment received is presented in Supplementary Table  
38 R3, for those who completed the 6-month follow-up assessment (summary not specified in  
39 protocol). Similar proportions of completing patients between study arms were either on  
40 medication for mental health condition(s) at the beginning on the trial (UBI = 31%; PAU  
41 25%), or started medication during the trial (UBI=18%; PAU=25%). Access to extended GP  
42 consultations or counselling sessions was higher for the PAU arm than for UBI (no UBI  
43 patient had an extended GP consultation, compared to 29% of PAU patients; and 25% of UBI  
44 patients had one or more counselling sessions, compared to 64% of PAU patients.)  
45  
46  
47  
48  
49

50  
51 Intra-class correlation coefficients (ICCs) for the outcome measures are presented in  
52 Supplementary Table R4. For the K10 (ICC = 0.129, 95% CI 0.045 – 0.231) this was  
53 relatively close to the ICC values used in planning the sample size for the study.  
54  
55  
56  
57  
58  
59

## Discussion

The brief psychological treatment (UBI) delivered by GPs in New Zealand in routine practice settings did not lead to better outcomes than PAU in this pragmatic efficacy trial.

UBI was not significantly more effective than PAU in reducing distress as measured by the K10. The K10 was originally introduced as an assessment measure of psychological distress, but has also been used to track change in mental health status following intervention (Sunderland, Wong, Hilvert-Bruce, & Andrews, 2012). There were no significant differences in the secondary measures either.

We were unable to achieve full recruitment to match the pre-determined sample size. As such, we were unable to rule out non-inferiority of the intervention (UBI) compared to PAU in reducing the disability and distress associated with mild to moderate mental health problems: the bounds of the confidence intervals for the two main outcomes (K10 and HADS measures) included sizable-magnitude better outcomes for PAU over UBI (e.g. the upper bound for the K10 was a 4.55 point advantage for PAU).

Both UBI and PAU arms showed improvement in clinical outcome over the 6 month course of the study. These findings are in keeping with other work which demonstrates clinical effectiveness of brief psychological interventions in primary care settings (Cape et al., 2010).

These results suggest that GPs in both arms were achieving clinical benefit. We cannot rule out that UBI performs slightly worse than PAU, but our results are inconclusive due to our reduced sample size.

### *Strengths of this study*

We consider the results of this trial a useful addition to the literature for two reasons. Firstly they describe the introduction of potentially useful adjuncts to existing therapy approaches in primary care in a randomised controlled setting, and secondly the 'negative results' raise questions about the challenges of conducting pragmatic trials of psychological interventions in primary care and also about the nature and effectiveness of PAU treatments. Feedback received from GPs during the training sessions suggested that elements of the UBI such as active listening, goal-setting; making a specific plan and following up on it are already used in routine practice. UBI had previously been piloted and shown to be both feasible and

1  
2  
3 acceptable to both clinicians and patients in a general practice setting (Collings et al., 2012).  
4 It was also able to be adapted in a culturally responsive way (Mathieson et al.,  
5 2012). During the course of the trial and following its completion there has been significant  
6 interest expressed by both patients and GPs in obtaining copies of the booklets and using  
7 elements of the UBI approach in routine consultations. Verbal feedback suggests that GPs  
8 particularly liked the helpful/unhelpful behaviour chart which was used to discuss how  
9 problems were maintained, the explicit linking of emotional responses to physical symptoms  
10 and the use of commitment and capability rulers (a motivational interviewing strategy).  
11  
12  
13  
14  
15

16 There is an active debate about the optimal balance of intervention components for the  
17 management of common mental health problems, with an increasingly varied range of  
18 options available. Patients potentially have access to traditional face to face intervention with  
19 a therapist, access to materials available on the internet, and further access to rapidly  
20 developing telemedicine and virtual consultation options (Andersson, Carlbring, &  
21 Hadjistavropoulos, 2017; Gilbody et al., 2015). Our study shows that over the course of the  
22 trial, patients and GPs were able to adapt the standard pattern of the GP consultation to a  
23 series of three sessions, allowing a more participation from the patient. This ability to  
24 'disrupt' the traditional pattern of GP consultations is important in an era where there is  
25 recognition in New Zealand and other OECD countries about the need to respond to the  
26 changing context of primary care, particularly in relation to long term conditions including  
27 common mental health problems (Baird et al., 2014).  
28  
29  
30  
31  
32  
33  
34  
35  
36  
37

### 38 ***Limitations***

39  
40 The difficulties in recruiting a sufficient sample size meant we were unable to establish  
41 benefit or rule out substantial inferiority of UBI compared to PAU. The main challenges of  
42 recruitment for trials in mental health have been described (Mason et al., 2007; McDonald et  
43 al., 2006; Weisfeld, English, & Claiborne, 2012). The current study contained specific  
44 additional challenges as outlined below.  
45  
46  
47  
48  
49

50 Firstly, our recruitment was limited by specific entry criteria required by a funder (to allow  
51 access to treatments as part of the PAU group). This meant we did not meet our sample size  
52 target despite energetic problem-solving over a 3 year recruitment period. It also meant that  
53 many GPs were not using the UBI tool until weeks or even months after training. This casts  
54  
55  
56  
57  
58  
59  
60

1  
2  
3 doubt on how well GPs would have adhered to the approach or recalled the principles,  
4 potentially affecting the quality of the intervention delivered.  
5  
6

7  
8 Secondly, in this New Zealand context, the GPs in the PAU group had access to a  
9 sophisticated range of therapy options which included providing extended consultations  
10 themselves, as well as referring patients to psychological therapies such as counselling or  
11 CBT delivered by clinical psychologists (Dowell 2009). In addition, during the course of the  
12 study there were significant changes to the way in which the external psychological services  
13 were delivered in our local PHO, with therapists (mental health professionals) being placed  
14 within practices rather than at a central location making it easier for in-house referral. Thus  
15 the results may not generalise to settings where these additional therapies are unavailable in  
16 day-to-day practice.  
17  
18  
19  
20  
21  
22

23 These changes made the task of demonstrating non-inferiority more challenging. UBI is  
24 consistent with the contemporary primary care stepped care approach that tailors  
25 interventions to symptom severity and response to treatment (Dowell, Morris, Dodds, &  
26 McLoughlin, 2012). The intervention tool (UBI) used in this study was developed for sub-  
27 threshold mental health syndromes, but was, in practice, applied to moderate-to-severe  
28 problems, due to demand from GPs who said they needed higher thresholds in order to be  
29 able to recruit patients. In the New Zealand context it appears those needing mental health  
30 interventions in primary care have more severe problems than the tool was intended for. The  
31 intervention may have performed relatively better than PAU if applied to a mild-to-moderate  
32 group, but this would need further research to ascertain. The moderate-to-severe group are  
33 likely to require longer, more intensive interventions for it to make a difference.  
34  
35  
36  
37  
38  
39  
40  
41

42 Given the known efficacy of the PAU intervention in this setting (Dowell et al., 2008), the  
43 results also attest to the success of the PAU options rather than a specific failing of the  
44 intervention. Clinicians who participated in this study might be expected to be those who  
45 were motivated and skilled in supporting patients with mental health problems. It is unclear  
46 in this case the extent to which the GPs in the UBI treatment arm were adhering to the  
47 structured approach outlined in the treatment manual. Fidelity and adherence to training for  
48 psychological intervention has been subject to commentary in the literature (Bellg et al.,  
49 2004; Morton et al., 2016) and it is unclear as to the extent to which UBI GPs were able to  
50 adhere to the structured manual.  
51  
52  
53  
54  
55  
56  
57  
58  
59  
60

## Conclusion

In this study both the PAU and UBI groups showed improvement in clinical outcome, despite UBI failing to demonstrate superiority or conclusive non-inferiority compared to PAU. This leaves open the question of whether this style of intervention may have potential value in a primary care setting, or whether some elements of this style of intervention are already being applied in practice by some clinicians. Either way, our results did not show that the UBI added value to usual care with patients with moderate-to-severe symptoms.

An ultra-brief approach such as UBI may add value if restricted to patients with mild mental health problems, as part of a suite of options, with different levels of intensity available to GPs in the primary care setting.

There is a significant need for further research into these issues, given the recognition of mental health problems at a community level (The MaGPIe Research Group, 2003; Whiteford et al., 2013) and the challenge of providing access to psychological therapy in an effective and cost-effective way (Clark, 2011; Gyani, Shafran, Layard, & Clark, 2013).

## Figure Legends

Figure 1. Study flowchart of patient participation.

Figure 2. Mean K10 score (95% CI) at baseline and follow up for UBI and PAU study arms.

Figure 3. Mean total HADS score (95% CI) at baseline and follow up for UBI and PAU study arms.

## Abbreviations

UBI: Ultra-brief intervention; PAU: Practice as Usual; GP: General Practitioner; PHO: Primary Health Organisation; K10: Kessler Psychological Distress Scale; HADS: Hospital Anxiety and Depression Scale; WSAS: Work and Social Adjustment Scale; NZDep2006: New Zealand index of individual socioeconomic deprivation.

## Authors' contributions

All authors contributed to the study design and study protocol. FM and SC are co-principal investigators. SC conceived the study, obtained initial funding, and contributed to the development of the intervention. FM and RT obtained co-funding. FM largely developed the

1  
2  
3 intervention, led GP training and PHO liaison. AD contributed to the intervention design and  
4 GP training. JS contributed to the study design and designed and conducted the analysis. JS,  
5 FM, AD and SC jointly interpreted the results. RT contributed as research assistant, assisted  
6 with practice recruitment and GP training, led the patient recruitment, data collection,  
7 processing and project management in the latter stages. All authors contributed to and  
8 approved the final manuscript.  
9  
10  
11

### 12 13 **Funding**

14  
15 Funding for this study was received from the local partner PHO, Compass Health, The  
16 Oakley Mental Health Research Foundation, Wellington Medical Research Foundation, and  
17 the University of Otago Research Fund. Funding was also received from the Health Research  
18 Council of New Zealand for the initial feasibility study, and from Oakley Mental Health  
19 Research Foundation and the University of Otago Research Fund for the Māori adaptation.  
20 The funding bodies had no role in the study design, collection, analysis and interpretation of  
21 data or in the writing of the manuscript.  
22  
23  
24  
25  
26  
27

### 28 **Competing Interests**

29  
30 None  
31  
32

### 33 **Acknowledgements**

34  
35 Thanks to Gabrielle Jenkin, who managed the project in the early phases; Felicity Goodyear  
36 Smith, Simon Hatcher and Sarah Gordon, who contributed to the study design in the early  
37 phases; Amy Munstermann who facilitated liaison with Compass Health; Brigitte Lane, who  
38 recruited practices and led the data collection for the first year and Denise Steers who  
39 contributed as a research assistant.  
40  
41  
42  
43

### 44 **Data sharing**

45  
46 Individual-level patient data are not available to other researchers as participants were not  
47 asked for consent to share their data. The study protocol (including statistical analysis plan) is  
48 available at in (Collings et al., 2015) (DOI:10.1186/s13063-015-0778-y). The code used to  
49 conduct the statistical analysis is available from the second author on request  
50 (james.stanley@otago.ac.nz).  
51  
52  
53  
54  
55  
56  
57  
58  
59  
60



## References

- American Psychiatric Association.** (2013). *Diagnostic and statistical manual of mental disorders (5th ed.)*. Washington, DC.
- Andersson, G., Carlbring, P., & Hadjistavropoulos, H. D.** (2017). Internet-based cognitive behavior therapy *The science of cognitive behavioral therapy* (pp. 531-549). San Diego, CA: Elsevier Academic Press; US.
- Andrews, G., & Slade, T.** (2001). Interpreting scores on the Kessler Psychological Distress Scale (K10). *Australian and New Zealand Journal of Public Health, 25*(6), 494-497.
- Baird, M., Blount, A., Brungardt, S., Dickinson, P., Dietrich, A., Epperly, T., . . . McDaniel, S.** (2014). Joint principles: integrating behavioral health care into the patient-centered medical home. *The Annals of Family Medicine, 12*(2), 183-185.
- Bates, D., Maechler, M., Bolker, B., & Walker, S.** (2015). Fitting Linear Mixed-Effects Models Using lme4. *Journal of Statistical Software, 67*(1), 1-48. doi: 10.18637/jss.v067.i01
- Bellg, A. J., Borrelli, B., B., R., Hecht, J., Minicucci, D. S., Ory, M., . . . Czajkowski, S.** (2004). Enhancing treatment fidelity in health behavior change studies: best practices and recommendations from the NIH Behavior Change Consortium. *Health Psychology, 23*(5), 443-451.
- Beunckens, C., Molenberghs, G., & Kenward, M. G.** (2005). Direct likelihood analysis versus simple forms of imputation for missing data in randomized clinical trials. *Clinical Trials, 2*(5), 379-386.
- Cape, J., Whittington, C., Buszewicz, M., Wallace, P., Underwood, L., & Medicine, B.** (2010). Brief psychological therapies for anxiety and depression in primary care: meta-analysis and meta-regression. *8*(38).
- Clark, D. M.** (2011). Implementing NICE guidelines for the psychological treatment of depression and anxiety disorders: the IAPT experience. *International review of psychiatry, Aug 1;23*(4), 318-327.
- Collings, S., & MaGPIe Research Group.** (2005). Disability and the detection of mental disorder in primary care. *Social Psychiatry & Psychiatric Epidemiology, 40*(12), 994-1002.
- Collings, S., Mathieson, F., Dowell, A., Stanley, J., Hatcher, S., Goodyear-Smith, F., . . . Munsterman, A.** (2015). Clinical effectiveness of an ultra-brief intervention for common mental health syndromes in primary care: study protocol for a cluster randomized controlled trial. *Trials [Electronic Resource], 16*(260), 1-7. doi: 10.1186/s13063-015-0778-y
- Collings, S., Mathieson, F., Dowell, A., Stanley, J., Jenkin, G., Goodyear-Smith, F., & Hatcher, S.** (2012). Acceptability of a guided self-help mental health intervention in general practice. [Research Support, Non-U.S. Gov't]. *Family Practice, 29*(1), 43-49.
- DeSouza, C. M., Legedza, A. T., & Sankoh, A. J.** (2009). An overview of practical approaches for handling missing data in clinical trials. *Journal of Biopharmaceutical Statistics, 19*(6), 1055-1073. doi: doi: 10.1080/10543400903242795
- Dew, K., Dowell, A., McLeod, D., Collings, S., & Bushnell, J.** (2005). "This glorious twilight zone of uncertainty": mental health consultations in general practice in New Zealand. *Social Science & Medicine 61*(6), 1189-1200.
- Dowell, A., Garrett, S., Collings, S., McBain, L., McKinlay, E., & Stanley, J.** (2007). Primary Mental Health Initiatives: Interim Report (pp. 242). Wellington: School of Medicine & Health Sciences, University of Otago, Wellington.
- Dowell, A., Garrett, S., Collings, S., McBain, L., McKinlay, E., & Stanley, J.** (2008). Evaluation of the Primary Mental Health Initiatives: summary report 2008. Wellington: Otago University Wellington and Ministry of Health.
- Dowell, A., Morris, C., Dodds, T., & McLoughlin, B.** (2012). Psychological interventions in primary care mental health. In I. G. (Ed.), *Companion to Primary Care Mental Health*. London: Radcliffe Publishing.

- 1  
2  
3 **Garrett, S., Dowell, A., Collings, S., McKinlay, E., McBain, L., & Stanley, J.** (2007). Evaluation of the  
4 Primary Mental Health Pilot Initiatives (interim report): Unpublished report, Wellington.
- 5 **Gellatly, J., Bower, P., Hennessy, S., Richards, D., Gilbody, S., & Lovell, K.** (2007). What makes self-  
6 help interventions effective in the management of depressive symptoms? Meta-analysis and  
7 meta-regression. *Psychological Medicine*, 37(9), 1217-1228.
- 8 **Gellatly, J., Chisnall, L., Seccombe, N., Ragan, K., Lidbetter, N., & Cavanagh, K.** (2017). @Home  
9 eTherapy Service for People with Common Mental Health Problems: An Evaluation.  
10 *Behavioural and Cognitive Psychotherapy*, 1-6. doi: doi:10.1017/S1352465817000297
- 11 **Gilbody, S., Littlewood, E., Hewitt, C., Brierley, G., Tharmanathan, P., Araya, R., . . . D., K.** (2015).  
12 Computerised cognitive behaviour therapy (cCBT) as treatment for depression in primary  
13 care (REEACT trial): large scale pragmatic randomised controlled trial. *British Medical*  
14 *Journal*, 351(h5627).
- 15 **Greenberg, P. E., Kessler, R. C., Birnbaum, H. G., Leong, S. A., Lowe, S. W., Berglund, P. A., & Corey-  
16 Lisle, P. K.** (2003). The economic burden of depression in the United States: How did it  
17 change between 1990 and 2000? [Empirical Study; Quantitative Study]. *The Journal of*  
18 *Clinical Psychiatry*, 64(12), 1465-1475. doi: <http://dx.doi.org/10.4088/JCP.v64n1211>
- 19 **Gyani, A., Shafran, R., Layard, R., & Clark, D. M.** (2013). Enhancing recovery rates: lessons from year  
20 one of IAPT. *Behaviour Research and Therapy*, Sep 30;51(9), 597-606.
- 21 **Hollingshurst, S., Kessler, D., Peters, T. J., & Gunnell, D.** (2005). Opportunity cost of antidepressant  
22 prescribing in England: Analysis of routine data. *BMJ: British Medical Journal*, 330(7498),  
23 999-1000. doi: <http://dx.doi.org/10.1136/bmj.38377.715799.F7>
- 24 **Horton, R.** (2012). Understanding disease, injury and risk. *The Lancet*, 380, 2053-2054.
- 25 **Jorm, A. F., & Griffiths, K. M.** (2006). Population promotion of informal self help strategies for early  
26 intervention against depression and anxiety. *Psychological Medicine*, 36, 3-6.
- 27 **Kessler, D., Lewis, G., Kaur, S., Wiles, N., King, M., Weich, S., . . . Peters, T. J.** (2009). Therapist-  
28 delivered internet psychotherapy for depression in primary care: A randomised controlled  
29 trial. [Empirical Study; Quantitative Study]. *The Lancet*, 374(9690), 628-634. doi:  
30 <http://dx.doi.org/10.1016/S0140-6736%2809%2961257-5>
- 31 **Kessler, R., Andrews, G., Clope, L. J., Hiripi, E., Mroczek, D. K., Normand, S., . . . Zaslavsky, A. M.**  
32 (2002). Short screening scales to monitor population prevalences and trends in non-specific  
33 psychological distress. *Psychological Medicine*, 32, 959-976.
- 34 **Kessler, R., Zhao, S., Blazer, D., & Swartz, M.** (1997). Prevalence, correlates, and course of minor  
35 depression in the national comorbidity survey. *Journal of Affective Disorders*, 45(1-2), 19-30.
- 36 **Layard, R., Clark, D., Bell, S., Knapp, M., Meacher, B., Priebe, S., . . . Wright, B.** (2006). The  
37 depression report; A new deal for depression and anxiety disorders. In T. C. f. E. P. s. M. H. P.  
38 Group (Ed.): London School of Economics.
- 39 **Mason, V. L., Shaw, A., Wiles, N. J., Mulligan, J., Peters, T. J., Sharp, D., & Lewis, G.** (2007). GPs'  
40 experiences of primary care mental health research: a qualitative study of the barriers to  
41 recruitment. *Family Practice*, 24(5), 518-525.
- 42 **Mathieson, F., Collings, S., & Dowell, A.** (2009). Sub-threshold mental health syndromes: Finding an  
43 alternative to the medication of unhappiness. *Journal of Primary Health Care*, 1(1), 74-77.
- 44 **Mathieson, F., Collings, S., Dowell, A., Goodyear-Smith, F., Stanley, J., & Hatcher, S.** (2013).  
45 Collaborative research: A case example of dissemination of CBT in primary care. [Empirical  
46 Study; Interview; Focus Group; Qualitative Study]. *the Cognitive Behaviour Therapist Vol 6*  
47 *2013, ArtID e4*, 6.
- 48 **Mathieson, F., Mihaere, K., Collings, S., Dowell, A., & Stanley, J.** (2012). Maori cultural adaptation  
49 of a brief mental health intervention in primary care. *Journal of Primary Health Care*, 4(3),  
50 231-238.
- 51 **McDonald, A. M., Knight, R. C., Campbell, M. K., Entwistle, V. A., Grant, A. M., Cook, J. A., . . .**  
52 **Snowdon, C.** (2006). What influences recruitment to randomised controlled trials? A review  
53 of trials funded by two UK funding agencies. *Trials*, 7(7), 1-9.



- 1  
2  
3 **Ministry of Health.** (2004). *Ethnicity Data Protocols for the Health and Disability Sector*. Wellington,  
4 New Zealand.
- 5 **Morton, L., Elliott, A., Thomas, R., Cleland, J., Deary, V., & Burton, C.** (2016). Developmental study  
6 of treatment fidelity, safety and acceptability of a Symptoms Clinic intervention delivered by  
7 General Practitioners to patients with multiple medically unexplained symptoms. *Journal of*  
8 *psychosomatic research.*, May 31(84), 37-43.
- 9 **Mundt, J. C., Marks, I. M., Shear, M. K., & Greist, J. H.** (2002). The work and social adjustment scale:  
10 a simple measure of impairment in functioning. *British Journal of Psychiatry*, 180, 461-464.
- 11 **Oakley-Browne, M., Wells, J., & Scott, K.** (2006). Te Rau Hingengaro: The New Zealand Mental  
12 Health Survey. Wellington: Ministry of Health.
- 13 **Sadek, N., & Bona, J.** (2000). Subsyndromal symptomatic depression: a new concept. *Depression and*  
14 *Anxiety*, 12, 30-39.
- 15 **Spinhoven, P., Ormel, J., Sloekers, P. P., Kempen, G. I., Speckens, A. E., & Van Hemert, A. M.**  
16 (1997). A validation study of the Hospital Anxiety and Depression Scale (HADS) in different  
17 groups of Dutch subjects. *Psychological Medicine*, 27(2), 363-170.
- 18 **Sunderland, M., Wong, N., Hilvert-Bruce, Z., & Andrews, G.** (2012). Investigating trajectories of  
19 change in psychological distress amongst patients with depression and generalised anxiety  
20 disorder treated with internet cognitive behavioural therapy. *Behaviour research and*  
21 *therapy*, Jun 30;50(6), 374-380.
- 22 **The MaGPIe Research Group.** (2003). The nature and prevalence of psychological problems in New  
23 Zealand primary health care: a report on Mental Health and General Practice Investigation  
24 NZMJ (Vol. 116, pp. 1-15).
- 25 **The MaGPIe Research Group.** (2006). The treatment of common mental health problems in general  
26 practice. *Family Practice*, 23, 53-59.
- 27 **Thorncroft, G., Chatterji, S., Evans-Lacko, S., Gruber, M., Sampson, N., Aguilar-Gaxiola, S., . . .**  
28 **Kessler, R. C.** (2017). Undertreatment of people with major depressive disorder in 21  
29 countries. [Empirical Study; Interview; Quantitative Study]. *The British Journal of Psychiatry*,  
30 210(2), 119-124. doi: <http://dx.doi.org/10.1192/bjp.bp.116.188078>
- 31 **Wagner, H., Burns, B., Broadhead, W., Yarnall, K., Sigmon, A., & Gaynes, B.** (2000). Minor  
32 depression in family practice: functional morbidity, co-morbidity, service utilisation and  
33 outcomes. *Psychological Medicine*, 30, 1377-1390.
- 34 **Wang, P. S., Simon, G., & Kessler, R. C.** (2003). The economic burden of depression and the cost-  
35 effectiveness of treatment. *International Journal of Methods in Psychiatric Research*, 12(1),  
36 22-33. doi: <http://dx.doi.org/10.1002/mpr.139>
- 37 **Weisfeld, V., English, R. A., & Claiborne, A. B.** (2012). *Public Engagement and Clinical Trials: New*  
38 *Models and Disruptive Technologies: Workshop Summary*.: National Academies Press.
- 39 **Whiteford, H. A., Degenhardt, L., Rehm, J., Baxter, A. J., Ferrari, A. J., Erskine, H. E., . . . Burstein, R.**  
40 (2013). Global burden of disease attributable to mental and substance use disorders:  
41 findings from the Global Burden of Disease Study 2010. *The Lancet*, Nov 15;382(9904), 1575-  
42 1586.
- 43 **Zigmond, A. S., & Snaith, R. P.** (1983). The hospital anxiety and depression scale. *Acta Psychiatrica*  
44 *Scandinavica*, 67(6), 361-370.
- 45  
46  
47  
48  
49  
50  
51  
52  
53  
54  
55  
56  
57  
58  
59  
60

**CONSORT**  
 TRANSPARENT REPORTING of TRIALS  
 CONSORT 2010 Flow Diagram

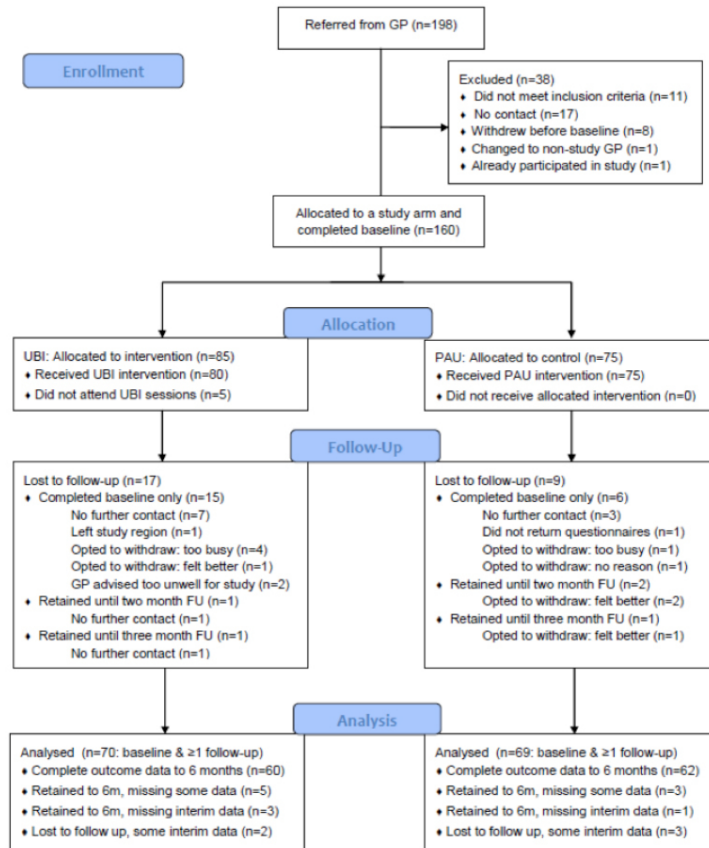

Figure 1. Study flowchart of patient participation.

90x90mm (300 x 300 DPI)

1  
2  
3  
4  
5  
6  
7  
8  
9  
10  
11  
12  
13  
14  
15  
16  
17  
18  
19  
20  
21  
22  
23  
24  
25  
26  
27  
28  
29  
30  
31  
32  
33  
34  
35  
36  
37  
38  
39  
40  
41  
42  
43  
44  
45  
46  
47  
48  
49  
50  
51  
52  
53  
54  
55  
56  
57  
58  
59  
60

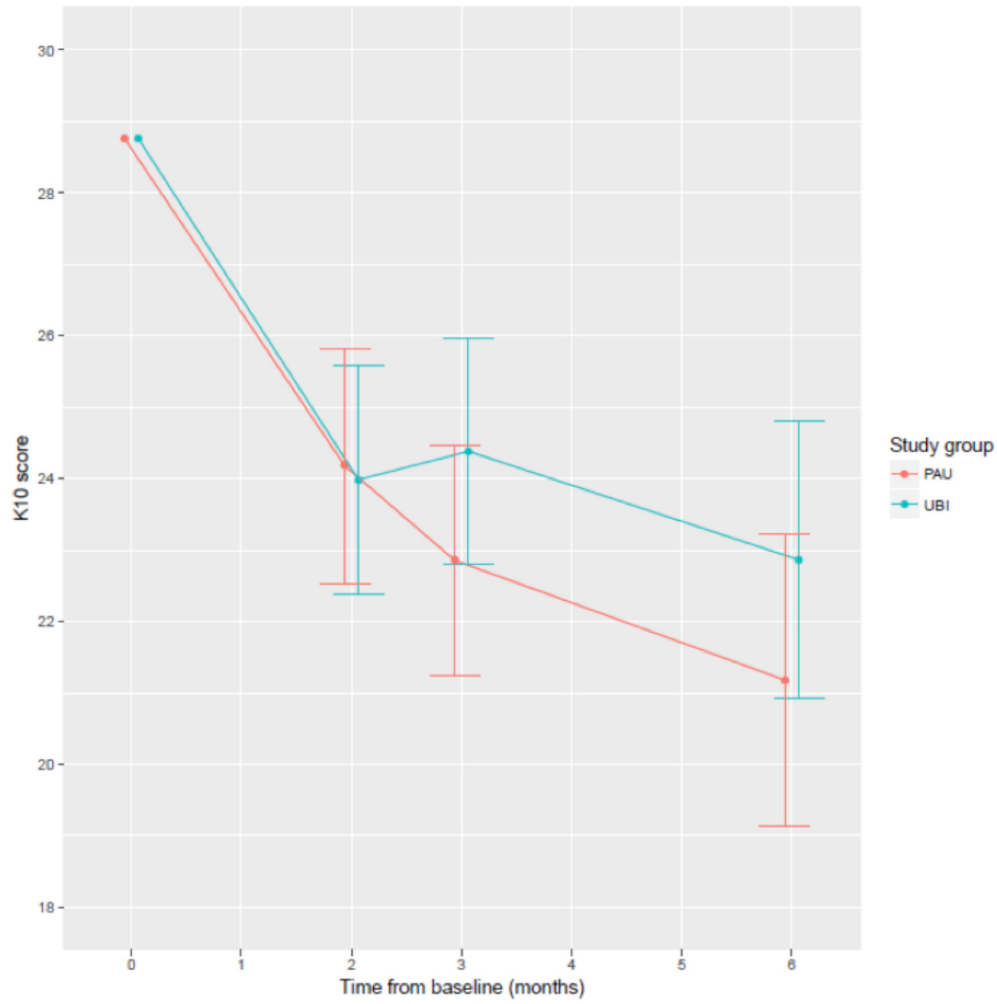

Figure 2. Mean K10 score (95% CI) at baseline and follow up for UBI and PAU study arms.

90x90mm (300 x 300 DPI)

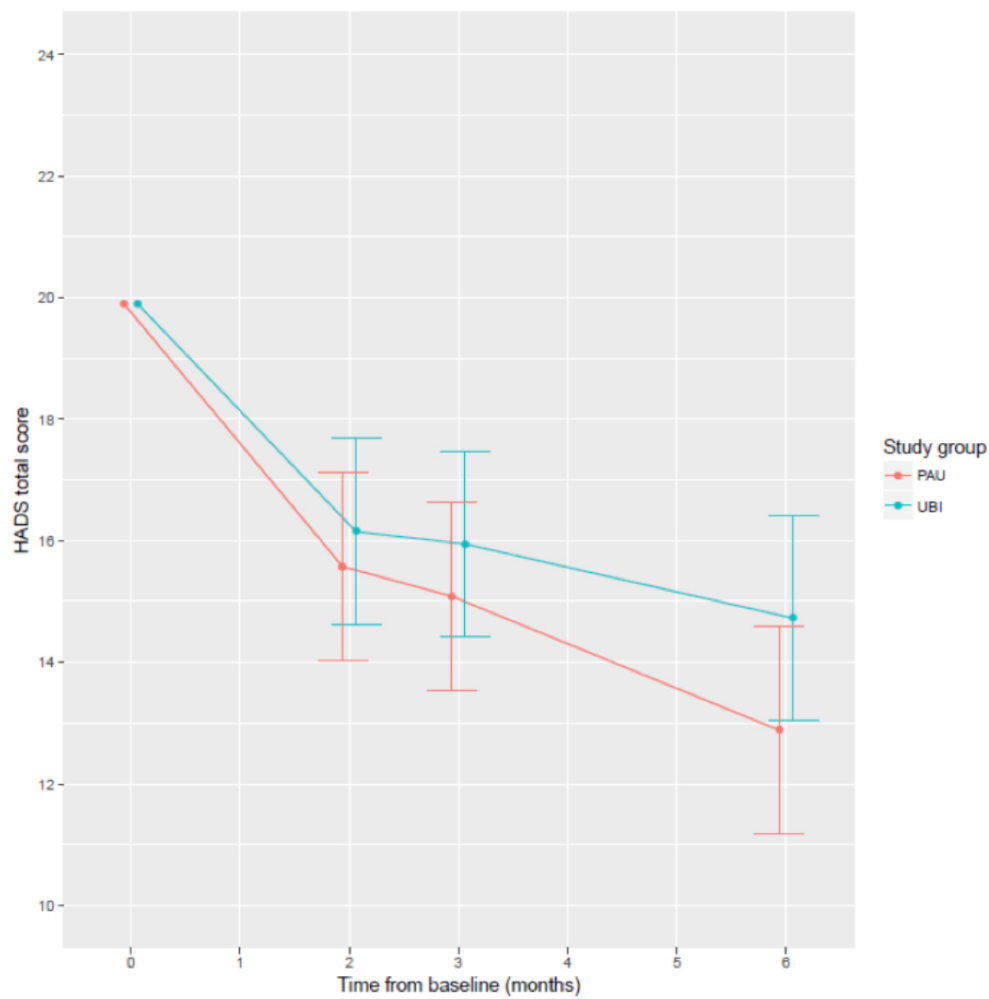

Figure 3. Mean total HADS score (95% CI) at baseline and follow up for UBI and PAU study arms.

90x90mm (300 x 300 DPI)

Supplementary Figure R1. Boxplots of baseline scores for each outcome measure (dots show each individual's score on that measure).

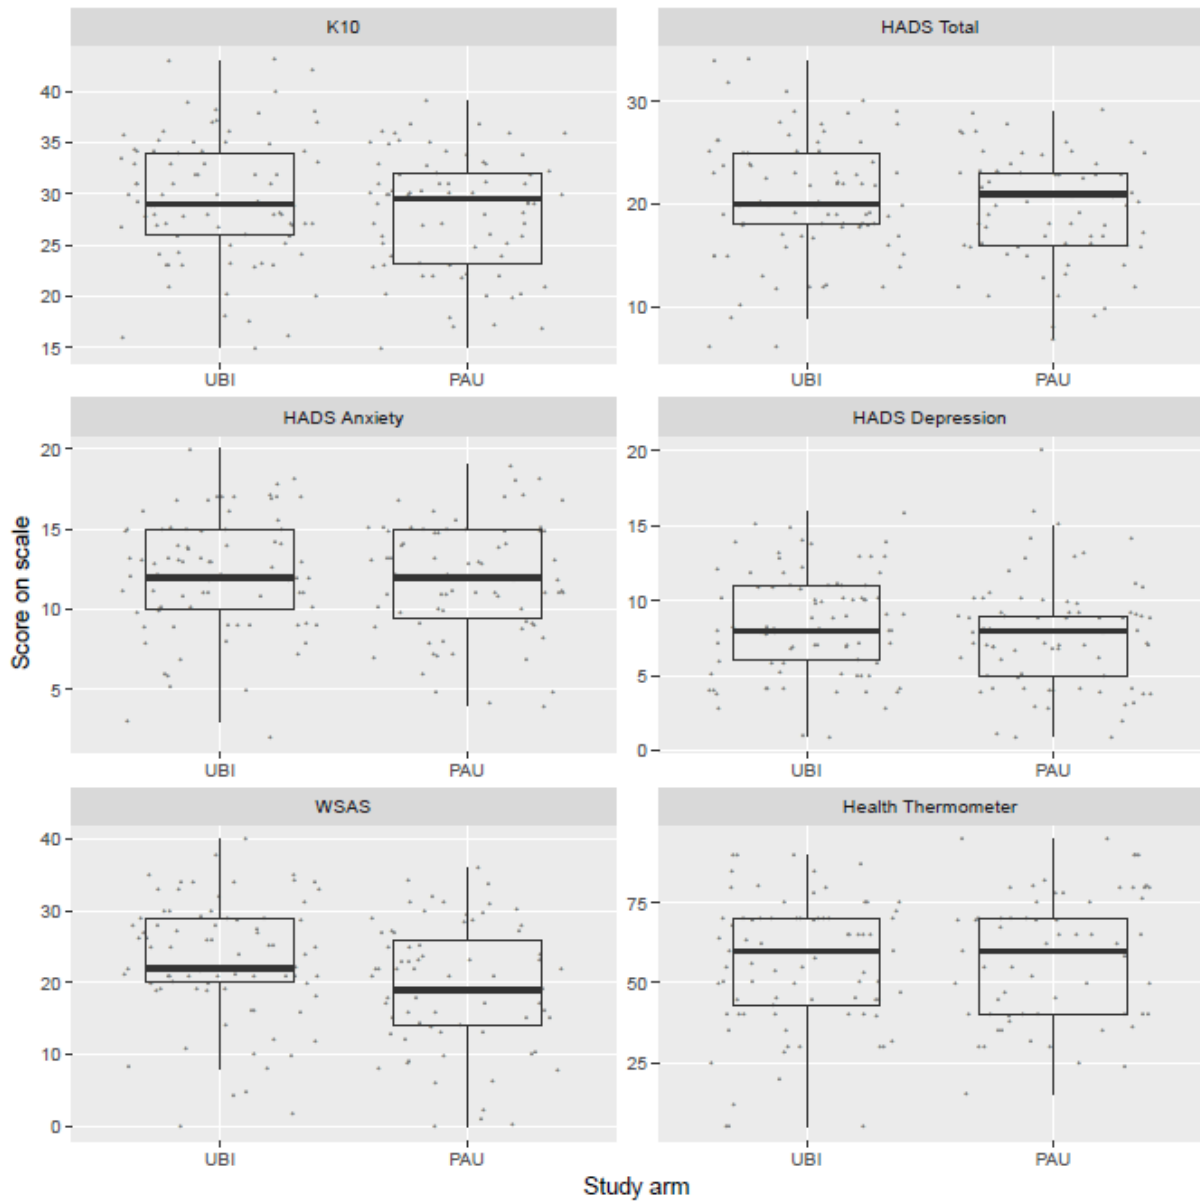

Supplementary Table R1. Number of patients recruited into study by GPs in UBI and PAU study arms.

| Number of patients recruited by GP | UBI<br>(n GPs*) | PAU<br>(n GPs*) |
|------------------------------------|-----------------|-----------------|
| 1                                  | 12              | 8               |
| 2                                  | 4               | 2               |
| 3                                  | 7               | 5               |
| 4                                  | 3               | 0               |
| 5                                  | 1               | 2               |
| 6                                  | 2               | 0               |
| 7                                  | 1               | 0               |
| 8                                  | 1               | 1               |
| 9                                  | 0               | 2               |
| 12                                 | 0               | 1               |
| <b>Total number of GPs</b>         | <b>31</b>       | <b>21</b>       |

\* Indicates the number of GPs recruiting the stated number of patients (e.g. 12 GPs in the UBI arm recruited one patient each; and five GPs in the PAU arm recruited three patients each).

Supplementary Table R2. Mean improvements from baseline to 6 month follow-up for each outcome measure.

| Outcome measure    | Mean at baseline<br>(both arms) | Mean improvement (95% CI)<br>from baseline to 6 months |                 |
|--------------------|---------------------------------|--------------------------------------------------------|-----------------|
|                    |                                 | PAU                                                    | UBI             |
| K10                | 28.8                            | 7.6 (5.5, 9.6)                                         | 5.9 (4.0, 7.8)  |
| HADS               | 19.9                            | 7.0 (5.3, 8.7)                                         | 5.2 (3.5, 6.9)  |
| HADS-A             | 12                              | 4.3 (3.3, 5.3)                                         | 3.2 (2.2, 4.2)  |
| HADS-D             | 7.9                             | 2.8 (1.9, 3.7)                                         | 1.9 (1.0, 2.8)  |
| WSAS               | 21.3                            | 7.7 (5.7, 9.7)                                         | 7.2 (5.3, 9.2)  |
| Health Thermometer | 57.5                            | 14.0 (9.3, 18.6)                                       | 9.0 (4.4, 13.7) |

1  
2  
3  
4  
5  
6  
7  
8  
9  
10  
11  
12  
13  
14  
15  
16  
17  
18  
19  
20  
21  
22  
23  
24  
25  
26  
27  
28  
29  
30  
31  
32  
33  
34  
35  
36  
37  
38  
39  
40  
41  
42  
43  
44  
45  
46  
47  
48  
49  
50  
51  
52  
53  
54  
55  
56  
57  
58  
59  
60

Supplementary Figure R2. Mean HADS Anxiety score (95% CI) at baseline and follow up for UBI and PAU study arms.

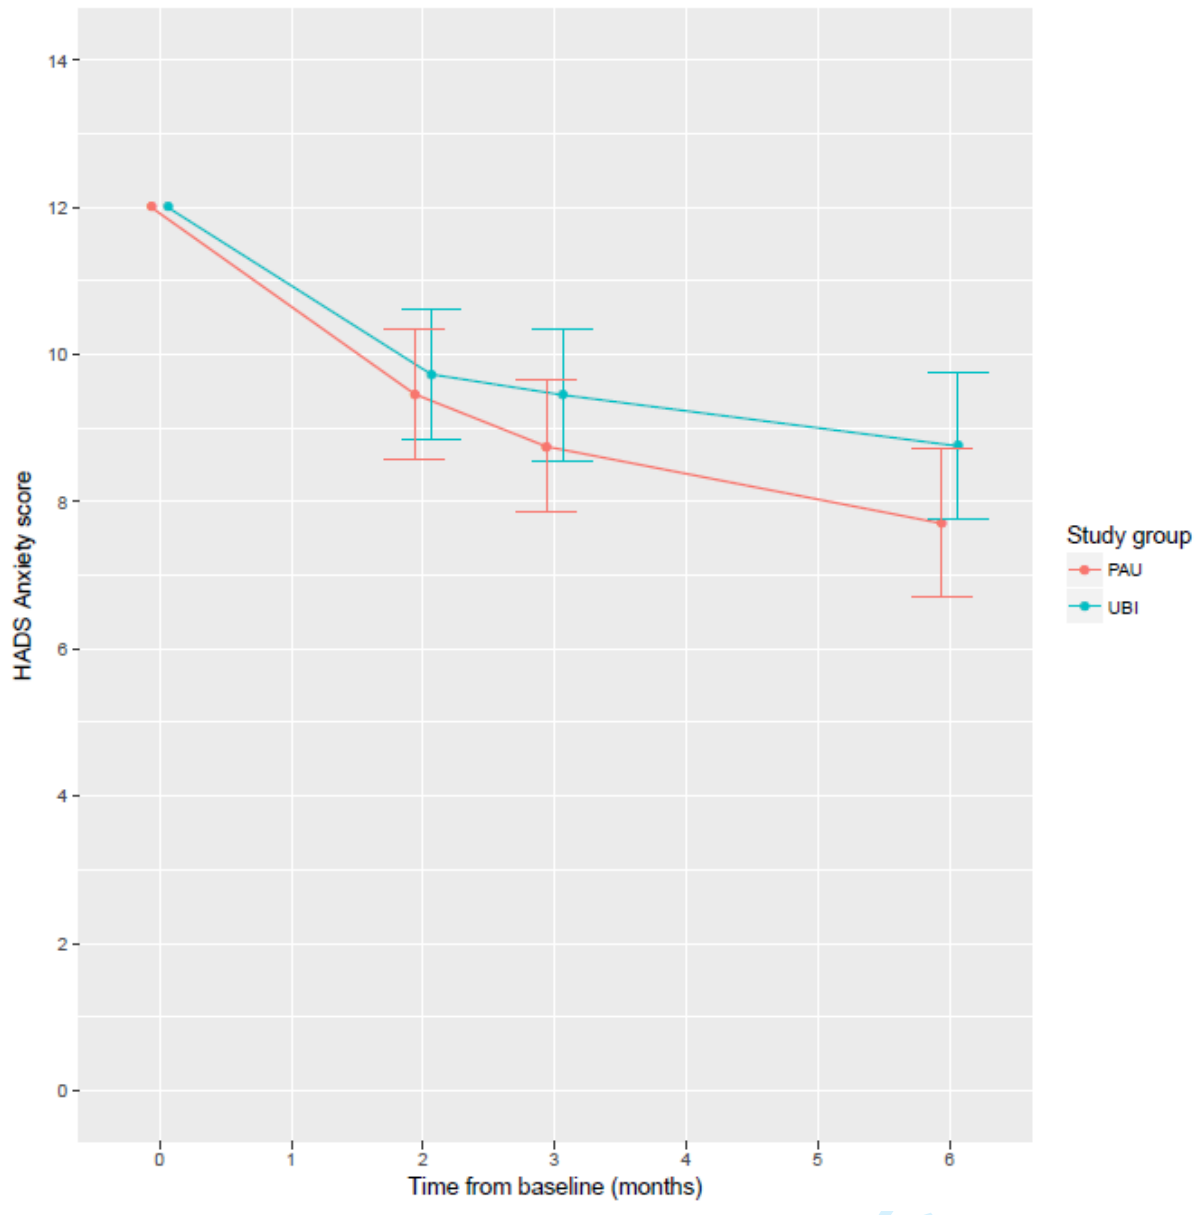

Supplementary Figure R3. Mean HADS Depression score (95% CI) at baseline and follow up for UBI and PAU study arms.

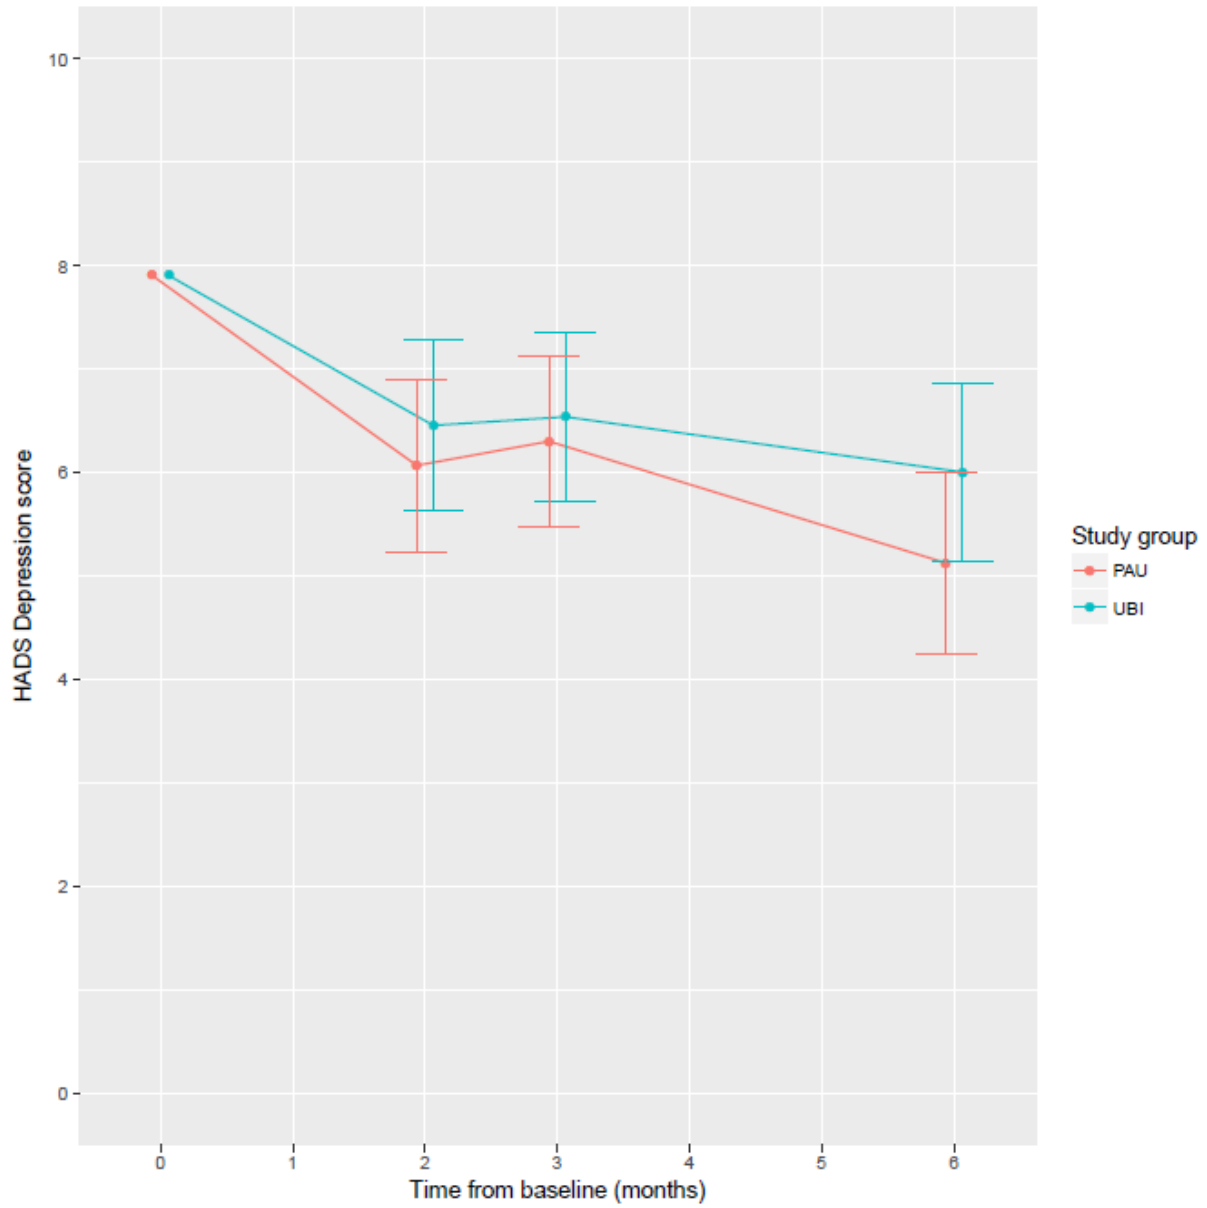



1  
2  
3  
4  
5  
6  
7  
8  
9  
10  
11  
12  
13  
14  
15  
16  
17  
18  
19  
20  
21  
22  
23  
24  
25  
26  
27  
28  
29  
30  
31  
32  
33  
34  
35  
36  
37  
38  
39  
40  
41  
42  
43  
44  
45  
46  
47  
48  
49  
50  
51  
52  
53  
54  
55  
56  
57  
58  
59  
60

Supplementary Figure R4. Mean WSAS score (95% CI) at baseline and follow up for UBI and PAU study arms.

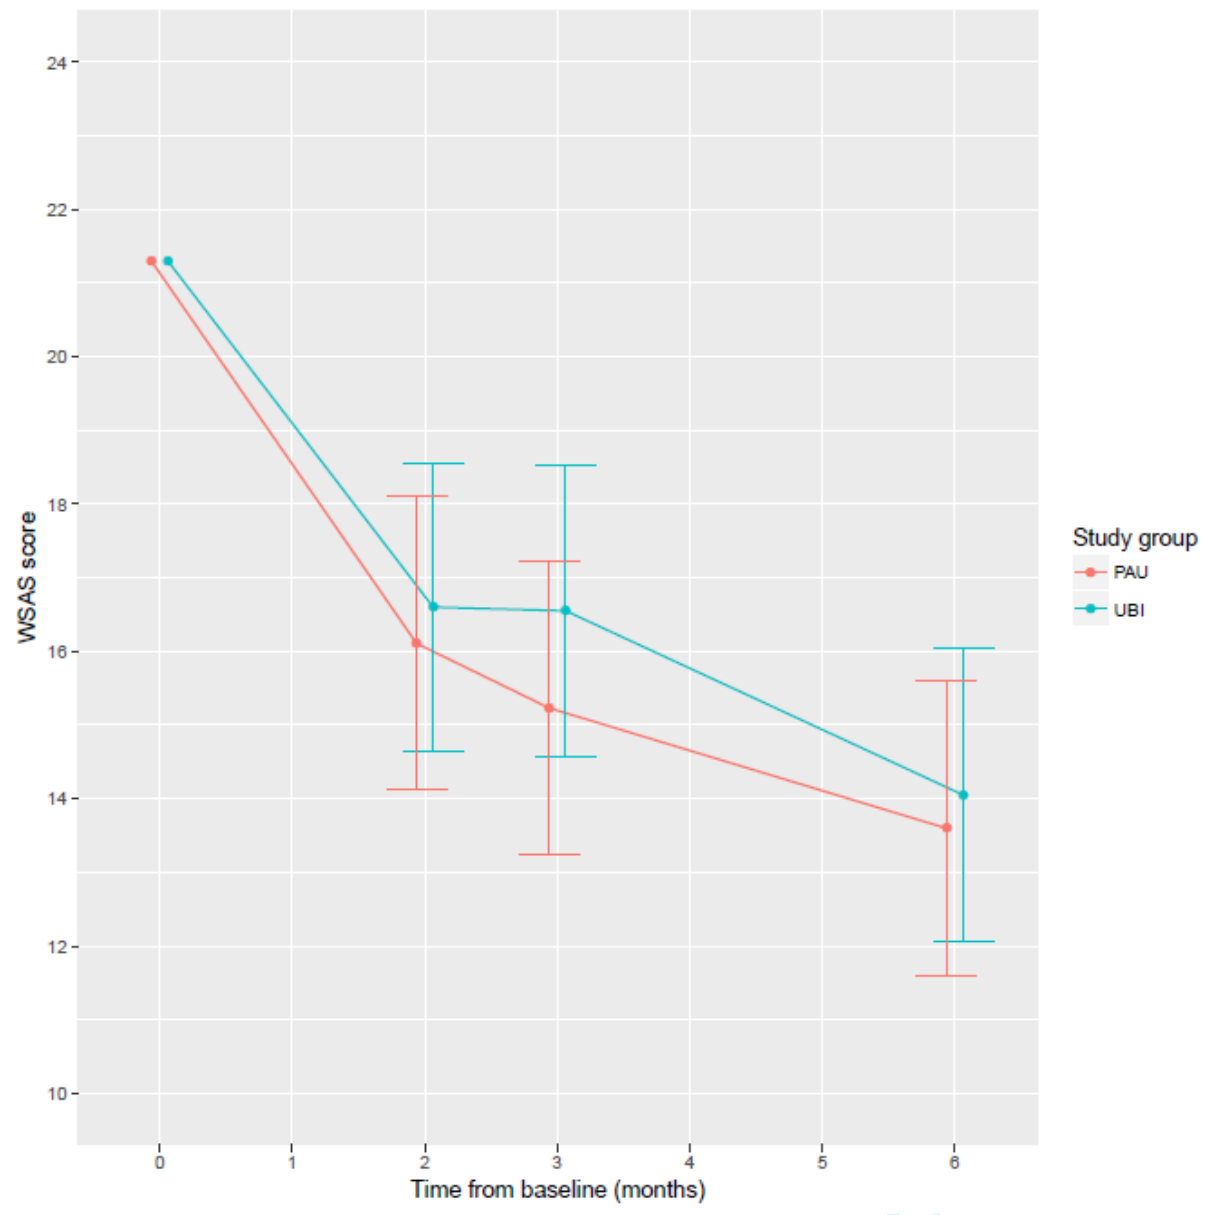

Supplementary Figure R5. Mean Health Thermometer score (95% CI) at baseline and follow up for UBI and PAU study arms.

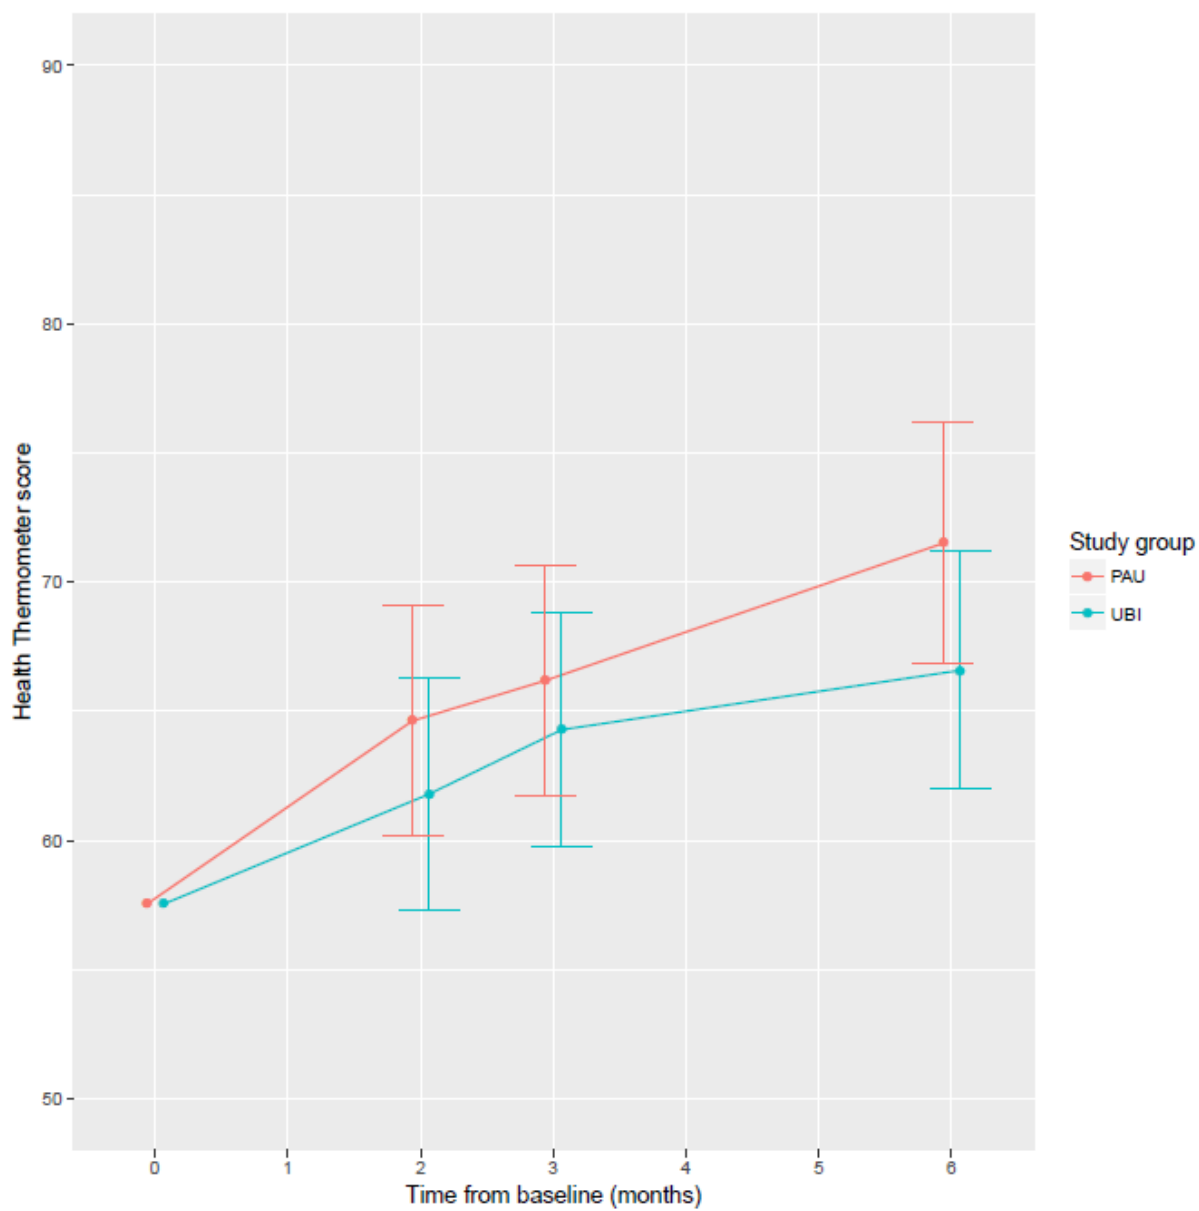

Supplementary Table R3. Additional treatment received during UBI trial (from question on 6 month interview)

| Type of additional treatment          | UBI<br>n (%) | PAU<br>n (%) |
|---------------------------------------|--------------|--------------|
| <b>Medication status during trial</b> |              |              |
| no relevant medication                | 33 (51%)     | 34 (52%)     |
| on medication prior to entering trial | 20 (31%)     | 16 (25%)     |
| started medication during trial       | 12 (18%)     | 16 (25%)     |
| did not complete question*            | 20           | 9            |
| <b>Extended GP consultations (n)</b>  |              |              |
| 0                                     | 68 (100%)    | 46 (71%)     |
| 1-2                                   | 0            | 8 (12%)      |
| 3-5                                   | 0            | 9 (14%)      |
| 6-10                                  | 0            | 2 (3%)       |
| did not complete question*            | 17           | 10           |
| <b>Counselling sessions (n)</b>       |              |              |
| 0                                     | 44 (75%)     | 21 (36%)     |
| 1-2                                   | 4 (7%)       | 13 (22%)     |
| 3-5                                   | 2 (3%)       | 11 (19%)     |
| 6-10                                  | 7 (12%)      | 12 (20%)     |
| 11+                                   | 2 (3%)       | 2 (3%)       |
| did not complete question*            | 26           | 16           |

\* Did not complete 6 month questionnaire and hence no data (UBI n=16; PAUn=9)

Did not answer Meds question at 6 months (UBI: n=4; PAU: n=1)

Did not answer Extended GP question at 6 months (UBI: n=1; PAU: n=1)

Did not answer Counselling question at 6 months (UBI: n=10; PAU: n=7)

Supplementary Methods: Calculation of intra-class correlation coefficients (ICCs) for outcome measures.

ICCs were calculated for each outcome measure in the study to summarise the impact of clustering of outcomes by GPs. These were calculated using simplified mixed linear models with random intercept terms for GPs and no adjustment for covariates. ICCs were calculated in R 3.2.3, using the lme4 package, with their 95% confidence intervals based on 1000 bootstrap resamples calculated using the bootMer() function.

Supplementary Table R4. Intra-class correlation coefficients (ICCs) for each outcome measure in the study.

| Outcome measure    | ICC   | (95% CI)       |
|--------------------|-------|----------------|
| K10                | 0.129 | (0.045, 0.231) |
| HADS (total)       | 0.091 | (0.019, 0.189) |
| HADS Anxiety       | 0.095 | (0.019, 0.198) |
| HADS Depression    | 0.142 | (0.047, 0.250) |
| WSAS               | 0.185 | (0.081, 0.308) |
| Health Thermometer | 0.086 | (0.013, 0.177) |

Reference for lmer package:

Douglas Bates, Martin Maechler, Ben Bolker, Steve Walker (2015). Fitting Linear Mixed-Effects Models Using lme4. Journal of Statistical Software, 67(1), 1-48. doi:10.18637/jss.v067.i01.

**Table 1: CONSORT 2010 checklist of information to include when reporting a cluster randomised trial**

| Section/Topic                    | Item No | Standard Checklist item                                                                                                                | Extension for cluster designs                                                                | Page No *                                |
|----------------------------------|---------|----------------------------------------------------------------------------------------------------------------------------------------|----------------------------------------------------------------------------------------------|------------------------------------------|
| <b>Title and abstract</b>        |         |                                                                                                                                        |                                                                                              |                                          |
|                                  | 1a      | Identification as a randomised trial in the title                                                                                      | Identification as a cluster randomised trial in the title                                    | Title page                               |
|                                  | 1b      | Structured summary of trial design, methods, results, and conclusions (for specific guidance see CONSORT for abstracts) <sup>1,2</sup> | See table 2                                                                                  | In abstract                              |
| <b>Introduction</b>              |         |                                                                                                                                        |                                                                                              |                                          |
| <b>Background and objectives</b> | 2a      | Scientific background and explanation of rationale                                                                                     | Rationale for using a cluster design                                                         | p. 4-5<br>also p. 6 (methods)            |
|                                  | 2b      | Specific objectives or hypotheses                                                                                                      | Whether objectives pertain to the cluster level, the individual participant level or both    | p. 4                                     |
| <b>Methods</b>                   |         |                                                                                                                                        |                                                                                              |                                          |
| <b>Trial design</b>              | 3a      | Description of trial design (such as parallel, factorial) including allocation ratio                                                   | Definition of cluster and description of how the design features apply to the clusters       | p. 4-5                                   |
|                                  | 3b      | Important changes to methods after trial commencement (such as eligibility criteria), with reasons                                     |                                                                                              | n/a                                      |
| <b>Participants</b>              | 4a      | Eligibility criteria for participants                                                                                                  | Eligibility criteria for clusters                                                            | p.4 (for both clusters and participants) |
|                                  | 4b      | Settings and locations where the data were collected                                                                                   |                                                                                              | p. 4                                     |
| <b>Interventions</b>             | 5       | The interventions for each group with sufficient details to allow replication, including how and when they were actually administered  | Whether interventions pertain to the cluster level, the individual participant level or both | p. 7                                     |
| <b>Outcomes</b>                  | 6a      | Completely defined pre-                                                                                                                | Whether outcome measures                                                                     | p. 8                                     |

|                                         |     |                                                                                                                                                                                             |                                                                                                                                                                                                                         |                                               |
|-----------------------------------------|-----|---------------------------------------------------------------------------------------------------------------------------------------------------------------------------------------------|-------------------------------------------------------------------------------------------------------------------------------------------------------------------------------------------------------------------------|-----------------------------------------------|
|                                         |     | specified primary and secondary outcome measures, including how and when they were assessed                                                                                                 | pertain to the cluster level, the individual participant level or both                                                                                                                                                  |                                               |
|                                         | 6b  | Any changes to trial outcomes after the trial commenced, with reasons                                                                                                                       |                                                                                                                                                                                                                         | n/a                                           |
| <b>Sample size</b>                      | 7a  | How sample size was determined                                                                                                                                                              | Method of calculation, number of clusters(s) (and whether equal or unequal cluster sizes are assumed), cluster size, a coefficient of intracluster correlation (ICC or <i>k</i> ), and an indication of its uncertainty | p. 8-9                                        |
|                                         | 7b  | When applicable, explanation of any interim analyses and stopping guidelines                                                                                                                |                                                                                                                                                                                                                         | n/a (no interim analysis was applied)         |
| <b>Randomisation:</b>                   |     |                                                                                                                                                                                             |                                                                                                                                                                                                                         |                                               |
| <b>Sequence generation</b>              | 8a  | Method used to generate the random allocation sequence                                                                                                                                      |                                                                                                                                                                                                                         | p. 6                                          |
|                                         | 8b  | Type of randomisation; details of any restriction (such as blocking and block size)                                                                                                         | Details of stratification or matching if used                                                                                                                                                                           | p. 6                                          |
| <b>Allocation concealment mechanism</b> | 9   | Mechanism used to implement the random allocation sequence (such as sequentially numbered containers), describing any steps taken to conceal the sequence until interventions were assigned | Specification that allocation was based on clusters rather than individuals and whether allocation concealment (if any) was at the cluster level, the individual participant level or both                              | n/a                                           |
| <b>Implementation</b>                   | 10  | Who generated the random allocation sequence, who enrolled participants, and who assigned participants to interventions                                                                     | Replace by 10a, 10b and 10c                                                                                                                                                                                             |                                               |
|                                         | 10a |                                                                                                                                                                                             | Who generated the random allocation sequence, who enrolled clusters, and who assigned clusters to interventions                                                                                                         | p. 6 (Recruitment and Randomisation sections) |

|                            |     |                                                                                                                                                |                                                                                                                                                                     |                                                                                                                                     |
|----------------------------|-----|------------------------------------------------------------------------------------------------------------------------------------------------|---------------------------------------------------------------------------------------------------------------------------------------------------------------------|-------------------------------------------------------------------------------------------------------------------------------------|
|                            | 10b |                                                                                                                                                | Mechanism by which individual participants were included in clusters for the purposes of the trial (such as complete enumeration, random sampling)                  | p. 7 (Recruitment procedures subsection)                                                                                            |
|                            | 10c |                                                                                                                                                | From whom consent was sought (representatives of the cluster, or individual cluster members, or both), and whether consent was sought before or after randomisation | p. 6 (for GPs as the clusters) and p.7 (consent for the patients)                                                                   |
| <b>Blinding</b>            |     |                                                                                                                                                |                                                                                                                                                                     |                                                                                                                                     |
|                            | 11a | If done, who was blinded after assignment to interventions (for example, participants, care providers, those assessing outcomes) and how       |                                                                                                                                                                     | GPs unable to be blinded (p 6)<br><br>Statistician blinded during analysis (p. 9)<br><br>Research assistant unable to be blinded    |
|                            | 11b | If relevant, description of the similarity of interventions                                                                                    |                                                                                                                                                                     | n/a                                                                                                                                 |
| <b>Statistical methods</b> |     |                                                                                                                                                |                                                                                                                                                                     |                                                                                                                                     |
|                            | 12a | Statistical methods used to compare groups for primary and secondary outcomes                                                                  | How clustering was taken into account                                                                                                                               | p.9-10<br><br>Analysis and clustering noted on p. 9                                                                                 |
|                            | 12b | Methods for additional analyses, such as subgroup analyses and adjusted analyses                                                               |                                                                                                                                                                     | p. 10                                                                                                                               |
| <b>Results</b>             |     |                                                                                                                                                |                                                                                                                                                                     |                                                                                                                                     |
|                            | 13a | For each group, the numbers of participants who were randomly assigned, received intended treatment, and were analysed for the primary outcome | For each group, the numbers of clusters that were randomly assigned, received intended treatment, and were analysed for the primary outcome                         | Clusters (GPs) noted on p. 11, additional detail in Supplementary Table R1.<br><br>Individual patients noted on p. 11, flowchart in |

|                                |     |                                                                                                                                         |                                                                                                                            |                                                                                                                                                                                                |
|--------------------------------|-----|-----------------------------------------------------------------------------------------------------------------------------------------|----------------------------------------------------------------------------------------------------------------------------|------------------------------------------------------------------------------------------------------------------------------------------------------------------------------------------------|
|                                |     |                                                                                                                                         |                                                                                                                            | Figure 1<br>(including who was covered in analysis)                                                                                                                                            |
|                                | 13b | For each group, losses and exclusions after randomisation, together with reasons                                                        | For each group, losses and exclusions for both clusters and individual cluster members                                     | Clusters (GPs) covered on p.11 (no losses or exclusions, other than zero-recruitment which is covered in Supplementary Table R1)<br><br>Patients covered in Figure 1                           |
| <b>Recruitment</b>             | 14a | Dates defining the periods of recruitment and follow-up                                                                                 |                                                                                                                            | p. 5                                                                                                                                                                                           |
|                                | 14b | Why the trial ended or was stopped                                                                                                      |                                                                                                                            | p. 5                                                                                                                                                                                           |
| <b>Baseline data</b>           | 15  | A table showing baseline demographic and clinical characteristics for each group                                                        | Baseline characteristics for the individual and cluster levels as applicable for each group                                | Individual level characteristics reported in Table 1.                                                                                                                                          |
| <b>Numbers analysed</b>        | 16  | For each group, number of participants (denominator) included in each analysis and whether the analysis was by original assigned groups | For each group, number of clusters included in each analysis                                                               | Analysis by original assigned groups (methods, p. 9)<br><br>Number of participants for each analysis: Table 2, Table 3<br><br>Number of clusters (across all analyses): Supplementary Table R1 |
| <b>Outcomes and estimation</b> | 17a | For each primary and secondary outcome, results for each group, and the estimated effect size and its precision (such as 95%            | Results at the individual or cluster level as applicable and a coefficient of intracluster correlation (ICC or k) for each | Effect size and precision given in all tables and figures, and for outcomes                                                                                                                    |



|                           |     |                                                                                                                                           |                                                                           |                                                                                                              |
|---------------------------|-----|-------------------------------------------------------------------------------------------------------------------------------------------|---------------------------------------------------------------------------|--------------------------------------------------------------------------------------------------------------|
|                           |     | confidence interval)                                                                                                                      | primary outcome                                                           | reported in body of text                                                                                     |
|                           |     |                                                                                                                                           |                                                                           | ICC reported on p 17 for primary outcomes, and Supplementary Table R4 for all outcomes.                      |
|                           | 17b | For binary outcomes, presentation of both absolute and relative effect sizes is recommended                                               |                                                                           | n/a (no binary outcomes used in study)                                                                       |
| <b>Ancillary analyses</b> | 18  | Results of any other analyses performed, including subgroup analyses and adjusted analyses, distinguishing pre-specified from exploratory |                                                                           | ICCs reported on page 17 (as noted above)<br><br>Information on additional treatment received presented p 17 |
| <b>Harms</b>              | 19  | All important harms or unintended effects in each group (for specific guidance see CONSORT for harms <sup>3</sup> )                       |                                                                           | n/a                                                                                                          |
| <b>Discussion</b>         |     |                                                                                                                                           |                                                                           |                                                                                                              |
| <b>Limitations</b>        | 20  | Trial limitations, addressing sources of potential bias, imprecision, and, if relevant, multiplicity of analyses                          |                                                                           | P 18-19 (recruitment not completed to planned sample size)<br><br>p 20-21 (other limitations)                |
| <b>Generalisability</b>   | 21  | Generalisability (external validity, applicability) of the trial findings                                                                 | Generalisability to clusters and/or individual participants (as relevant) | p. 20-21                                                                                                     |
| <b>Interpretation</b>     | 22  | Interpretation consistent with results, balancing benefits and harms, and considering other relevant evidence                             |                                                                           | (across discussion)                                                                                          |
| <b>Other information</b>  |     |                                                                                                                                           |                                                                           |                                                                                                              |

|                     |    |                                                                                 |                                 |
|---------------------|----|---------------------------------------------------------------------------------|---------------------------------|
| <b>Registration</b> | 23 | Registration number and name of trial registry                                  | p.4                             |
| <b>Protocol</b>     | 24 | Where the full trial protocol can be accessed, if available                     | p. 4, reference list for detail |
| <b>Funding</b>      | 25 | Sources of funding and other support (such as supply of drugs), role of funders | p. 22-23                        |

\* Note: page numbers optional depending on journal requirements

For peer review only

**Table 2: Extension of CONSORT for abstracts<sup>1,2</sup> to reports of cluster randomised trials**

| Item                      | Standard Checklist item                                                                                     | Extension for cluster trials                                                                                   |
|---------------------------|-------------------------------------------------------------------------------------------------------------|----------------------------------------------------------------------------------------------------------------|
| <b>Title</b>              | Identification of study as randomised                                                                       | <b>Identification of study as cluster randomised</b>                                                           |
| <b>Trial design</b>       | Description of the trial design (e.g. parallel, cluster, non-inferiority)                                   |                                                                                                                |
| <b>Methods</b>            |                                                                                                             |                                                                                                                |
| <b>Participants</b>       | Eligibility criteria for participants and the settings where the data were collected                        | <b>Eligibility criteria for clusters</b>                                                                       |
| <b>Interventions</b>      | Interventions intended for each group                                                                       |                                                                                                                |
| <b>Objective</b>          | Specific objective or hypothesis                                                                            | <b>Whether objective or hypothesis pertains to the cluster level, the individual participant level or both</b> |
| <b>Outcome</b>            | Clearly defined primary outcome for this report                                                             | <b>Whether the primary outcome pertains to the cluster level, the individual participant level or both</b>     |
| <b>Randomization</b>      | How participants were allocated to interventions                                                            | <b>How clusters were allocated to interventions</b>                                                            |
| <b>Blinding (masking)</b> | Whether or not participants, care givers, and those assessing the outcomes were blinded to group assignment |                                                                                                                |
| <b>Results</b>            |                                                                                                             |                                                                                                                |
| <b>Numbers randomized</b> | Number of participants randomized to each group                                                             | <b>Number of clusters randomized to each group</b>                                                             |
| <b>Recruitment</b>        | Trial status <sup>1</sup>                                                                                   |                                                                                                                |
| <b>Numbers analysed</b>   | Number of participants analysed in each group                                                               | <b>Number of clusters analysed in each group</b>                                                               |
| <b>Outcome</b>            | For the primary outcome, a result for each group and the estimated effect size and its precision            | <b>Results at the cluster or individual participant level as applicable for each primary outcome</b>           |
| <b>Harms</b>              | Important adverse events or side effects                                                                    |                                                                                                                |
| <b>Conclusions</b>        | General interpretation of the results                                                                       |                                                                                                                |
| <b>Trial registration</b> | Registration number and name of trial register                                                              |                                                                                                                |
| <b>Funding</b>            | Source of funding                                                                                           |                                                                                                                |

<sup>1</sup> Relevant to Conference Abstracts

## REFERENCES

- 1 Hopewell S, Clarke M, Moher D, Wager E, Middleton P, Altman DG, et al. CONSORT for reporting randomised trials in journal and conference abstracts. *Lancet* 2008, 371:281-283
- 2 Hopewell S, Clarke M, Moher D, Wager E, Middleton P, Altman DG at al (2008) CONSORT for reporting randomized controlled trials in journal and conference abstracts: explanation and elaboration. *PLoS Med* 5(1): e20
- 3 Ioannidis JP, Evans SJ, Gotzsche PC, O'Neill RT, Altman DG, Schulz K, Moher D. Better reporting of harms in randomized trials: an extension of the CONSORT statement. *Ann Intern Med* 2004; 141(10):781-788.

# BMJ Open

## A cluster randomised controlled trial of a guided self-help mental health intervention in primary care

|                                 |                                                                                                                                                                                                                                                                                                                                                                                                                                                                    |
|---------------------------------|--------------------------------------------------------------------------------------------------------------------------------------------------------------------------------------------------------------------------------------------------------------------------------------------------------------------------------------------------------------------------------------------------------------------------------------------------------------------|
| Journal:                        | <i>BMJ Open</i>                                                                                                                                                                                                                                                                                                                                                                                                                                                    |
| Manuscript ID                   | bmjopen-2018-023481.R1                                                                                                                                                                                                                                                                                                                                                                                                                                             |
| Article Type:                   | Research                                                                                                                                                                                                                                                                                                                                                                                                                                                           |
| Date Submitted by the Author:   | 25-Oct-2018                                                                                                                                                                                                                                                                                                                                                                                                                                                        |
| Complete List of Authors:       | Mathieson, Fiona; University of Otago – Wellington, Department of Psychological Medicine<br>Stanley, James; University of Otago, Wellington, Public Health; University of Otago, Wellington<br>Collings, Catherine (Sunny) ; University of Otago Wellington, Deans Department<br>Tester, Rachel; University of Otago, Wellington, Primary Health Care and General Practice<br>Dowell, Anthony; Wellington School of Medicine and Health Sciences, General Practice |
| <b>Primary Subject Heading</b>: | Mental health                                                                                                                                                                                                                                                                                                                                                                                                                                                      |
| Secondary Subject Heading:      | General practice / Family practice, Mental health                                                                                                                                                                                                                                                                                                                                                                                                                  |
| Keywords:                       | MENTAL HEALTH, PRIMARY CARE, BRIEF INTERVENTIONS                                                                                                                                                                                                                                                                                                                                                                                                                   |
|                                 |                                                                                                                                                                                                                                                                                                                                                                                                                                                                    |

SCHOLARONE™  
Manuscripts

1  
2  
3 1  
4  
5 2 **A cluster randomised controlled trial of a guided self-help mental health intervention in**  
6 **primary care**  
7 3  
8

9 4 Fiona Mathieson<sup>1</sup>

10 5 Email: [fiona.mathieson@otago.ac.nz](mailto:fiona.mathieson@otago.ac.nz)

11 6 James Stanley<sup>2</sup>

12 7 Email: [james.stanley@otago.ac.nz](mailto:james.stanley@otago.ac.nz)

13 8 Sunny Collings<sup>3</sup>

14 9 Email: [deanseauow@otago.ac.nz](mailto:deanseauow@otago.ac.nz)

15 10 Rachel Tester<sup>4</sup>

16 11 Email: [rachel.testler@otago.ac.nz](mailto:rachel.testler@otago.ac.nz)

17 12 Anthony Dowell<sup>4</sup>

18 13 Email: [tony.dowell@otago.ac.nz](mailto:tony.dowell@otago.ac.nz)

19 14  
20 15 \* Corresponding author: [fiona.mathieson@otago.ac.nz](mailto:fiona.mathieson@otago.ac.nz) Ph. 64 4 9186034, Fax 64 4 3855877

21 16 <sup>1</sup>Department of Psychological Medicine, University of Otago, PO Box 7343, Wellington South  
22 17 6242, New Zealand

23 18 <sup>2</sup>Biostatistical Group, Dean's Department, University of Otago, PO Box 7343, Wellington South  
24 19 6242, New Zealand

25 20 <sup>3</sup>Office of the Dean and Head of Campus Te Tari Manutaki,  
26 21 Department of Psychological Medicine, University of Otago, PO Box 7343, Wellington South  
27 22 6242, New Zealand

28 23 <sup>4</sup>Department of Primary Health Care and General Practice, University of Otago, PO Box 7343,  
29 24 Wellington South 6242, New Zealand

30 25  
31 26 Word Count: 5801

32 27  
33 28 **Abstract**

34 29 **Objectives:** To ascertain whether an ultra-brief intervention improves mental health outcomes  
35 30 for patients in general practice with mild-to-moderate mental health concerns.

36 31 **Trial design:** Two-arm cluster randomised controlled trial.

37 32 **Methods:**

38 33 **Participants:** General practitioners (GPs) were invited based on working in a participating  
39 34 general practice. Patients were eligible to participate if aged 18-65, scored  $\leq 35$  on the Kessler-10  
40 35 (K10) and if meeting local mental health access criteria (based on age, low income, or ethnic  
41 36 group).

37 **Interventions:** Intervention arm GPs were trained on the ultra-brief intervention (UBI)  
38 approach, with participating patients receiving three structured appointments over five weeks.  
39 GPs randomised to Practice as Usual (PAU) did not receive training, and delivered support  
40 following their existing practice approaches.

41 **Outcome Measures:** Primary outcome was patient-level K10 score at 6 months post-  
42 recruitment.

43 **Randomisation:** GP practices were randomised to UBI training or PAU at the start of the study.

44 **Blinding:** GPs were not blinded to group assignment.

### 45 **Results:**

46 **Numbers randomised:** 62 GPs (recruiting 85 patients) were randomised to UBI, and 50 to PAU  
47 (recruiting 75 patients).

48 **Numbers analysed:** 31 GPs recruited at least one patient in the UBI arm (70 patients analysed),  
49 and 21 GPs recruited at least one patient in the PAU arm (69 patients analysed).

50 **Outcome:** K10 scores from an intention-to-treat analysis were similar in UBI and PAU arms,  
51 with a wide confidence interval (mean adjusted K10 difference = 1.68 points higher in UBI arm,  
52 95% CI -1.18, 4.55; p=0.255). Secondary outcomes were also similar in the two groups.

53 **Conclusions:** The UBI intervention did not lead to better outcomes than practice as usual.  
54 Results from 'negative trials' such as this contribute to the continuing development of brief  
55 psychological therapy options for primary care.

56 **Trial registration:** Australia New Zealand Clinical Trials Registry ACTRN12613000041752

57 **Funding:** Compass Health, Oakley Mental Health Research Foundation, Wellington Medical  
58 Research Foundation, University of Otago Research Fund

### 61 **Strengths and limitations**

- 62 • Pragmatic effectiveness trial of a mental health intervention in primary care.
- 63 • Intervention included Maori cultural adaptations.
- 64 • Recruitment issues limit strength of results.
- 65 • Intervention was applied to more severe mental health presentations than it was developed  
66 for.
- 67 • GP degree of adherence to the intervention tool is unclear.

68

**Keywords**

Mental Health, Primary Care

**Introduction**

Mental health is major aspect of health and poor mental health is highly prevalent in the general community. Consistent with international findings, just under 40% of the New Zealand (NZ) population had met criteria for a diagnosable mental disorder during their life, and roughly a fifth had experienced a mental disorder in the previous year [1].

There is also considerable international concern about the healthcare burden arising from mental health problems and substance abuse [2-4]), with the World Mental Health Survey (of 21 countries) suggesting that only 41% of people with depression received treatment that met even minimal standards [5].

In NZ, as in other OECD countries, mental health problems are common presentations in primary care. Around one-quarter of primary care patients (26.5% and 29.8% of men and women, respectively), attending their general practice in NZ met criteria for a mild-moderate mental health disorder and an estimated 50-70% of mental health concerns are managed exclusively at the primary care level, since secondary care services have become more targeted towards severe and enduring mental illness in recent years [6].

Internationally there is a call for psychological therapies to be more widely available in primary care [7], and growing unease about increasing levels of antidepressant medications being prescribed compared with the limited resources available for psychological interventions [8].

However, treatment options at the primary care level are limited, with GPs expressing concerns about gaps in services for patients with mild-moderate mental health presentations and a desire to offer a brief intervention themselves [9]. In NZ, GPs reported that as few as 22% of patients with mild-moderate mental health syndromes receive any formal help [10].

Such patient presentations often comprise sub-threshold syndromes [11, 12], and cases of mild-moderate common mental disorder. These are combinations of problems such as anxiety, depression, substance use and interpersonal problems that do not meet the threshold for disorder



1  
2  
3 96 in standard diagnostic systems such as DSM-5. Often these arise in the context of social  
4  
5 97 problems or family or economic stress. In NZ, 36% of general practice attendees report anxiety,  
6  
7 98 depression or substance-use, or a combination of these issues [6]. Such presentations can be  
8  
9 99 associated with significant impairment in functioning and suffering [13, 14], with some going on  
10  
11 100 to develop severe depression [15, 16]. Intervention may be warranted for up to 80% of those  
12  
13 101 affected [10, 13], but referral out of the practice can be problematic due to referral eligibility  
14  
15 102 criteria, waiting times, administrative issues and cost [9, 17, 18].

16 103 Increasing knowledge of the burden of mild-moderate disorder led to the development of a  
17  
18 104 platform of Primary Mental Health Initiatives in NZ, which included some increase in access to  
19  
20 105 psychological therapies and extended consultations with GPs. The inclusion criteria for these  
21  
22 106 initiatives, however, mean that only up to 15% of the population can gain access to those  
23  
24 107 services [9].

25 108 This service-gap led us to develop a GP delivered ultra-brief intervention (UBI), with  
26  
27 109 development and refinement based on service user feedback [19]. This model has the advantages  
28  
29 110 of avoiding the need for referral on to an expensive professional, such as a psychologist, of being  
30  
31 111 easily accessible to patients, and of potentially building on existing trusted relationships. This fits  
32  
33 112 with the movement towards alternative methods of service delivery for mild to moderate mental  
34  
35 113 health presentations, often termed ‘low intensity’ interventions. These interventions often include  
36  
37 114 guided self-help, bibliotherapy and computerised delivery of care, with current evidence  
38  
39 115 suggesting that even minimal therapist contact leads to better outcomes than self-help alone [20-  
40  
41 116 23].

42 117 UBI was feasibility tested with a group of 16 patients and then adapted for Maori (the indigenous  
43  
44 118 people of New Zealand) and feasibility tested with a group of 9 patients [24, 25]. Based on  
45  
46 119 questionnaire feedback, clinician and patient satisfaction ratings for both feasibility studies were  
47  
48 120 very positive in terms of relevance and acceptability. The psychological well-being of the  
49  
50 121 patients, as measured by the Kessler-10 (K10) [26], was also significantly improved post-  
51  
52 122 intervention (at 3 month follow-up) for both Maori and non-Maori, although there was no control  
53  
54 123 group [24, 25]. Based on these initial findings we designed a cluster randomized controlled trial  
55  
56 124 to measure the effectiveness of UBI.

1  
2  
3 125 The aims of the study were to compare patient-level outcomes on (1) mental health state (as  
4 126 measured by K10 scores) at 6 months between UBI and practice as usual (PAU) study arms  
5  
6 127 (primary outcome) and (2) levels of distress (depression and anxiety) and functioning (work,  
7  
8 128 social and relationship) at 8 weeks and 3 months between UBI and PAU study arms (as  
9  
10 129 secondary outcomes).

## 11 12 13 130 **Methods**

14  
15 131 A protocol for this study has been previously published, and includes description of planned  
16  
17 132 analyses [27]. The trial was registered prior to recruitment commencing with the Australia New  
18  
19 133 Zealand Clinical Trials Registry (registration ACTRN12613000041752.)

### 20 21 134 **Design**

22  
23  
24 135 We used a pragmatic two-arm single blinded, cluster randomised controlled trial of UBI  
25  
26 136 compared with PAU, in a primary care setting. GPs were randomised by practice to exclusively  
27  
28 137 deliver either UBI or PAU to all their recruited patients. GPs were treated as the clusters in the  
29  
30 138 study design (while there was clustering by practice, the GPs were treated as the unit of analysis  
31  
32 139 as practitioner attributes were anticipated to be a higher source of variability in outcomes.)  
33  
34 140 Analysis followed an intention-to-treat approach.

### 35 141 **Setting**

36  
37 142 The study was conducted in general practices in the greater Wellington region, New Zealand.  
38  
39 143 This included practices in both city and semi-rural settings, serving populations from a wide  
40  
41 144 range of socio-economic backgrounds. Recruitment took place between 1/5/2013 and 1/7/2016.  
42  
43 145 The trial ended prior to achieving the final sample size when funding for data collection was  
44  
45 146 exhausted.

46 147

47 148

48  
49 149

50  
51 150

52  
53 151

## 54 152 **Participants**

1  
2  
3 153 This was a pragmatic trial supported within existing treatment services. GPs were eligible to  
4 participate if they were currently working in a practice that was part of the Compass Health  
5 154 Primary Health Organisation (PHO) which covers the greater Wellington region.  
6  
7 155  
8  
9 156

10 157 Patients were eligible if aged between 18 and 65 and identified by their GP in a routine  
11 appointment as experiencing stress or distress. Patients were required to score 35 or less on the  
12 158 Kessler Psychological Distress Scale (K10) [26, 28] during their initial GP consultation, with no  
13 159 lower cut-off on this score. The present study followed previous study protocols [24, 25] by  
14 including scores between 30 and 35 on the K10 as indicative of mild to moderate levels of  
15 160 psychological distress rather than major psychiatric disorder. Individuals taking anti-depressant  
16 161 or other psychiatric medications were eligible to participate in the study.  
17  
18 162  
19 163  
20  
21 164

22 165 Patients were excluded if they lacked fluency in English (as the intervention is an English-  
23 language based ‘talking therapy’); had significant levels of cognitive impairment as determined  
24 166 by the GP; or had reported recent or acute suicidal ideation (i.e., within the previous 2 weeks).  
25 167 Chronic low level suicidality did not exclude an individual from participating. However, GPs  
26 168 were informed of patients who had high scores or suicidality at screening, or for whom referral  
27 169 to appropriate (secondary) mental health services by GPs was indicated, and these patients were  
28 170 not eligible to participate further in the study.  
29  
30 171  
31  
32  
33  
34  
35

36 172 Inclusion criteria were based on the access criteria of a local partner primary health  
37 organisation (PHO) to psychological therapies. These criteria were youth (defined as 18-24 years  
38 173 old), or individuals aged 25 years or older with low income, or Māori or Pacific Island heritage.  
39 174  
40  
41

### 42 175 **Recruitment of practices and GPs**

43  
44 176 Initial recruitment of practices was supported by the partner PHO. GPs were identified using  
45 177 primary health organisation and practice lists. All of the practices contracted under the partner  
46 178 PHO were contacted (N=52) and invited to participate in the study, and an effort was made to  
47 179 contact all of the GPs within these practices by email, telephone or in person. A total of 23  
48 180 practices initially consented to participate in the study and a further 18 were recruited during the  
49 181 course of the study. Two practices merged and three withdrew (in each case the single  
50 182 participating GP left the practice) leaving a total of 37 practices involved in the study.  
51  
52  
53  
54  
55  
56  
57  
58  
59  
60

183

### 184 **Randomisation of practices to study arms**

185

186 Consenting practices were randomised to provide either UBI or PAU to eligible patients.  
187 Randomisation was conducted at the practice level to reduce the risk of contamination if GPs  
188 from the same practice were assigned to opposite study arms. To ensure approximately equal  
189 numbers of GPs per study arm, randomisation of practices was conducted within five strata,  
190 according to the number of participating GPs (one/two/three/four/more than four). An additional  
191 two practices dedicated to youth health that were not part of the partner PHO were included and  
192 randomised into each arm of the study (i.e. these two practices formed their own stratum).  
193 Practices were entered into the trial following consent from individual participating GPs in that  
194 practice. Randomisation of all consenting practices was conducted following this step by the  
195 project biostatistician (JS) using a computer-based randomisation following the above  
196 stratification profile.

197

198 GPs randomised to the UBI study arm completed a single two-hour training session (as  
199 previously described [25]). Due to the training nature of the intervention, it was not possible to  
200 blind GPs as to their study arm allocation.

201

### 202 **Recruitment procedures**

203 GPs identified patients with common mental health problems who might fulfil study criteria  
204 during routine appointments. These patients were screened by the GP for eligibility (using the  
205 K10), and referred to the study team. A research assistant then contacted potential participating  
206 patients, met with them in person where possible to explain the study, confirm eligibility, obtain  
207 consent to participate, and collect pre-treatment (baseline) data. Measures were then collected by  
208 mail or email at post-treatment (8 weeks, 3 months and 6 months). Patients received  
209 compensation (NZ \$30 [US\$21] vouchers, and entry into a draw for an iPad) following the  
210 completion of the final questionnaire, to recompense for time and effort in participating in the  
211 study.

212

### 213 **Intervention**

1  
2  
3 214 UBI is a low intensity self-management programme which can be delivered by a GP after a  
4  
5 215 single two-hour training session using a treatment manual based on structured problem solving,  
6  
7 216 motivational interviewing and cognitive behaviour therapy (supported with self-help booklets on  
8  
9 217 relationships, bodily stress, breaking habits and stress management).

10  
11 218 Patients who consented and completed the intake data collection (K10 and baseline  
12  
13 219 measurements) received the GP-led intervention in three short, structured face-to-face sessions  
14  
15 220 (one 30 and two 15 minute sessions) over a five to six week period. Relevant booklets were  
16  
17 221 provided to the patient after the first session, to be used in the following session. In New Zealand  
18  
19 222 a stepped care approach to management guides the practitioner towards using the most  
20  
21 223 appropriate therapy option for the severity of presentation. UBI was designed for mild to  
22  
23 224 moderate presentations and in training GPs were comfortable with the use of the UBI approach  
24  
25 225 for first line management. The study protocol allowed for patients in either study arm to alter  
26  
27 226 their treatment as needed (e.g. access other talking therapies, or commence mental health  
28  
29 227 medications). Patients were blinded as to their study allocation in that patients in PAU practices  
30  
31 228 were not informed that the UBI was offered in practices randomised to deliver UBI. They were  
32  
33 229 simply told that the study was looking at the effectiveness of PAU [27].

### 34 35 36 37 38 39 40 41 42 43 44 230 **Practice as usual**

45  
46  
47 231 Patients in the PAU study arm received GP support delivered according to their practice as usual  
48  
49 232 (and available existing services). PAU typically consists of supportive counselling in a 15 minute  
50  
51 233 face-to-face consultation, the provision of psychotropic medication, referral to psychological or  
52  
53 234 other counselling options, or referral to relevant community services.

### 54 55 56 57 58 59 60 235 61 62 63 64 65 66 236 **Patient characteristics**

67  
68  
69 237  
70  
71 238 Patients are described on the basis of age, gender, prioritised ethnicity and NZiDep, a NZ-  
72  
73 239 developed index [29] of individual-level socioeconomic deprivation.  
74  
75 240 GPs in practices assigned to the PAU study arm received optional training in the intervention at  
76  
77 241 the end of the study.

78  
79  
80 242  
81  
82 243

244

### 245 **Patient and Public Involvement**

246 This study had input from an academic mental health consumer (i.e. an academic who is also a  
247 mental health service user and who conducts research from a service user perspective) as part of  
248 the research team at the feasibility stage, and designed the intervention based on feedback from a  
249 focus group process with potential patient users of the mental health intervention which asked  
250 what characteristics such an intervention would need to have. This collaborative process is fully  
251 described in [19]. This RCT did not have academic consumer or patient involvement in the  
252 recruitment to and conduct of the study and the burden of the intervention was not assessed by  
253 the patients. Results of this study will be disseminated by email to GP participants who indicated  
254 they wanted them on the consent form.

255

### 256 **Outcome measures**

257 The primary outcome measure was the K10 scale [26, 28] score at 6 months (adjusted for score  
258 at baseline: see analysis). The K10 is widely used as a clinical outcome measure in Primary Care  
259 and General Practice in NZ [9]. A 6 month follow up period was chosen to obtain a sufficient  
260 period of assessment following the end of the intervention while at the same time balancing out  
261 challenges in patient cohort retention. All analyses were conducted to look at patient-level  
262 outcomes.

263

264 Secondary outcomes were:

- 265 1) Hospital Anxiety and Depression Scale (HADS), which measures the severity of depressive  
266 and anxiety symptoms in outpatient hospital settings [30]. Reductions in HADS score  
267 indicate reduced anxiety and depression.
- 268 2) Comparison of K10 scores by treatment group at 8 weeks and 12 weeks, adjusted for baseline  
269 scores (to capture short and medium term effectiveness).
- 270 3) Work and Social Adjustment Scale [31], a measure of work, social and relationship  
271 functioning) administered at baseline, 8, 12 and 26 weeks.

272 Outcomes were measured at the same time points in both UBI and PAU groups (baseline, and at  
273 8, 12, and 26 weeks following baseline)

274

## 275 **Statistical methods**

### 276 **Sample size and Power analysis**

277 Sample size for the cluster randomised trial was calculated using a simulation method, using  
278 standard deviations of patient outcomes from the UBI feasibility study (standard deviation of  
279 post-treatment scores = 7.5 [25]). To detect a difference in K10 improvement scores of 6 points  
280 in the UBI arm compared with 2 points in the control arm (at 80% power and alpha = 0.05)  
281 would require 15 GPs per arm recruiting eight completing patients each on average (n=240 total  
282 with complete data). Adjusting for loss to follow-up of 20% gave a recruitment target of ten  
283 patients per GP. The simulation settings roughly correspond to an intraclass correlation (ICC) of  
284 0.15 for considering clustering of patient scores by GP (equivalent to the ICC from the feasibility  
285 study [25]). Power analysis for the secondary HADS outcome indicated 80% power to detect a  
286 difference of 3.2 points between groups (based on a standard deviation of approximately 6 [32])  
287 assuming a similar ICC for the HADS scale as for the K10 measure (empirical data were not  
288 available).

289

### 290 **Data Analysis**

291

292 The statistician was blinded to the intervention or control status of participants (both practices  
293 and patients) during conduct of the study and analysis. Results were unblinded once analysis was  
294 complete. Data processing and analysis were conducted in R 3.2.3 (R Institute, Vienna) with  
295 linear mixed models fit using the lmer package [33] and imputation conducted using the mice  
296 package [34].

297

298 For the primary outcome, K10 scores at 6 months were compared between the intervention and  
299 control groups using mixed linear models (comparing post-intervention scores between groups,  
300 adjusting for intake score as a covariate, and treating GP clusters as random slope effects).  
301 Analysis was conducted on an intention-to-treat basis according to the study arm for each patient  
302 at entry into the study. Analyses were adjusted for all other baseline covariates (age, gender,  
303 ethnicity, educational level, and NZiDep). The original protocol stated that analyses would only  
304 be adjusted for baseline-values of each score: given some slight imbalance in sociodemographic



1  
2  
3 305 characteristics it was decided to adjust for other baseline covariates in the main analyses. The  
4  
5 306 originally planned analyses are presented in supplementary materials (overall patterns discussed  
6  
7 307 in the body of the results).

8 308  
9  
10 309 Missing data were handled through the mixed linear models approach to the data, which allows  
11  
12 310 for patients with missing data on the final outcome to be included in analyses, which in effect  
13  
14 311 estimates a final outcome value conditional on the observed data at other follow-up times (i.e.  
15  
16 312 validity being predicated under the assumption that the missing observations are missing at  
17  
18 313 random [MAR], conditional on the observed data [35, 36]). Participants missing all follow-up  
19  
20 314 data were excluded from this main analysis. The null hypothesis for this test was that the K10  
21  
22 315 scores at 26 weeks (adjusted for baseline score) were not different for the intervention and  
23  
24 316 control groups.

25 317 Sensitivity analysis for missing follow-up data in the K10 primary outcome were planned and  
26  
27 318 conducted following completion of the main analysis, and hence were not noted in the trial  
28  
29 319 registration or protocol paper. These analyses covered two scenarios: firstly, an analysis with  
30  
31 320 multiple imputation of missing outcomes, conditional on observed baseline sociodemographics  
32  
33 321 and baseline outcome data. This analysis hence included participants who only had baseline data  
34  
35 322 recorded (excluded from the main mixed models analysis), and assumes that the unobserved  
36  
37 323 outcome data are missing at random conditional on observed data: that is, that individuals who  
38  
39 324 were missing from all follow-up data collections had the same outcome profile (on average) as  
40  
41 325 participants with similar profiles at baseline [37]. The second sensitivity analysis explored this  
42  
43 326 missing at random assumption: those missing data post-baseline were (i) assumed to have scores  
44  
45 327 at 6 months that were four points worse than their imputed score in the first sensitivity analysis;  
46  
47 328 (ii) assumed to have had no improvement from baseline (last observation carried forward); and  
48  
49 329 (iii) assumed to have had poorer outcomes at six months than at baseline (4 points worse than  
50  
51 330 baseline). Full details of the imputation procedure and sensitivity analyses are presented in the  
52  
53 331 Supplementary material, and results are summarised and discussed in the main body of the  
54  
55 332 results and discussion.

56 333  
57  
58 334 For the secondary analysis, differences in mean scores on the K10 outcome were reported at 8  
59  
60 335 weeks and 3 months (using the same methods as above, within the mixed linear models



1  
2  
3 336 framework). Analysis of the HADS and WSAS scores at 8 weeks, 3 months and 6 months  
4  
5 337 utilised the same methods as for the K10 outcome. Analysis of outcomes at 8 weeks and 3  
6  
7 338 months was not specified on the clinical trials registry, but was noted in the previously published  
8  
9 339 protocol paper [27].

10 340

11  
12 341 The EQ-5D-3L was noted as a secondary outcome for quality of life in the trial registry. This  
13  
14 342 measure was intended as part of an economic analysis that was not implemented, and no other  
15  
16 343 economic data was collected as part of this study.

17 344

18  
19 345 Intra-class correlation coefficient (ICC) values were calculated for each outcome measure as a  
20  
21 346 summary of clustering according to GPs. Because our analytical models only accounted for  
22  
23 347 clustering at the level of individual GPs, we also examined ICC values when clustering was  
24  
25 348 considered as a multilevel structure (GPs nested within specific practices). Details of the  
26  
27 349 calculation methods are provided in the Supplementary Materials.

28 350

29 351 Additional treatments received during the trial (including medication and talking therapies) were  
30  
31 352 analysed by study arm, based on self-report data collected at the 6 month follow-up. This  
32  
33 353 descriptive analysis was not specified in the study protocol.

34 354

### 35 355 **Confidentiality and data management**

36  
37  
38 356 Consenting patients had their rights explained along with provision for data confidentiality.  
39  
40 357 Paper and digital copies of the data were secured in locked storage on the premises of the  
41  
42 358 University of Otago, Wellington. The questionnaire data was de-identified and entered into a  
43  
44 359 spreadsheet for subsequent analysis.

### 45 46 360 **Ethics approval**

47  
48  
49 361 Ethical approval was received from the Health and Disability Ethics Committees (HDEC),  
50  
51 362 Ministry of Health (Northern B Health and Disability ethics committee 12/NTB/2).

52 363  
53  
54  
55  
56  
57  
58  
59  
60

364 Adverse events were not anticipated in this trial, and arrangements were made to feedback  
365 clinical information to GPs if deemed necessary (e.g., high K10 scores or concerning self-  
366 reported statements about a patient's safety) in the course of data collection.

367

## 368 **Results**

### 369 **GP Participants**

370 A total of 41 practices agreed to participate, with a total of 112 individual GPs consenting to take  
371 part in the study (n=62 for UBI, and n=50 for PAU). Of these GPs, 31 recruited at least one  
372 patient into the study in the UBI arm (from 22 practices), and 21 recruited at least one patient in  
373 the PAU arm (from 12 practices). The numbers of GPs recruiting different numbers of patients is  
374 shown in Supplementary Table R1.

### 375 **Patient Participants**

376 Figure 1 summarises the flow of patients into the study and participation in the interventions and  
377 follow-up. A total of 198 patients were referred into the study, and 160 met eligibility criteria  
378 and completed baseline assessments. The vast majority of these completed at least one post-  
379 intervention follow-up (70 / 85 in the UBI arm [82%]; and 69/75 in the PAU group [92%]) and  
380 hence contributed to the data analysis. These patients represented 29 GPs (from 21 practices) and  
381 20 GPs (from 12 practices) in the intervention and control arms respectively.

382 <Insert figure 1 about here>

### 383 **Baseline data**

384 Baseline sociodemographic characteristics of patients are presented in Table 1 for the two study  
385 arms. The two groups were roughly comparable at baseline, with a few more male participants  
386 and a slightly younger age profile in the UBI arm, but with a greater representation of females in  
387 the study overall.

388

389 Table 1. Patient sociodemographic profile by study arm.

| Variable                 | Level              | Study Group        |                    |
|--------------------------|--------------------|--------------------|--------------------|
|                          |                    | UBI (Total n = 85) | PAU (Total n = 75) |
|                          |                    | n (%)              | n (%)              |
| <b>Gender</b>            |                    |                    |                    |
|                          | Female*            | 56 (65.9)          | 57 (76.0)          |
|                          | Male               | 29 (34.1)          | 18 (24.0)          |
| <b>Age Group</b>         |                    |                    |                    |
|                          | 15-24              | 55 (64.7)          | 37 (49.3)          |
|                          | 25-34              | 16 (18.8)          | 15 (20.0)          |
|                          | 35-44              | 3 (3.5)            | 13 (17.3)          |
|                          | 45-54              | 5 (5.9)            | 6 (8.0)            |
|                          | 55+                | 6 (7.1)            | 4 (5.3)            |
| <b>Ethnicity</b>         |                    |                    |                    |
|                          | NZE/Other          | 61 (71.8)          | 54 (72.0)          |
|                          | Māori              | 19 (22.4)          | 14 (18.7)          |
|                          | Pacific            | 4 (4.7)            | 2 (2.7)            |
|                          | Asian              | 1 (1.2)            | 5 (6.7)            |
| <b>Highest education</b> |                    |                    |                    |
|                          | At least secondary | 78 (91.8)          | 71 (94.7)          |
|                          | No secondary level | 7 (8.2)            | 4 (5.3)            |
| <b>NZiDep</b>            |                    |                    |                    |
|                          | 0 (least deprived) | 18 (21.2)          | 11 (14.7)          |
|                          | 1                  | 16 (18.8)          | 17 (22.7)          |
|                          | 2                  | 15 (17.6)          | 11 (14.7)          |
|                          | 3                  | 10 (11.8)          | 10 (13.3)          |
|                          | 4                  | 9 (10.6)           | 12 (16.0)          |
|                          | 5 (most deprived)  | 17 (20.0)          | 14 (18.7)          |

\* Includes one individual self-identifying as Female (transgender)

390

391 Mean baseline scores on the outcome measures were also similar between the two groups (Table  
 392 2, showing means and standard deviations). Boxplots of the distribution of baseline scores on  
 393 each outcome scale are given in Supplementary Figure R1.

394

395 Table 2. Mean (standard deviation) of baseline scores for outcome measures by study arm

| Outcome variable     | Study Group        |                    |
|----------------------|--------------------|--------------------|
|                      | UBI (Total n = 85) | PAU (Total n = 75) |
|                      | mean (sd)          | mean (sd)          |
| K10*                 | 29.5 (6.2)         | 28.1 (5.7)         |
| HADS – total         | 20.6 (5.9)         | 19.5 (5.1)         |
| HADS – anxiety       | 12.1 (3.6)         | 11.9 (3.5)         |
| HADS – depression    | 8.5 (3.5)          | 7.7 (3.6)          |
| WSAS                 | 23.0 (8.2)         | 19.6 (8.5)         |
| Health Thermometer** | 55.4 (19.9)        | 58.8 (18.7)        |

\* One patient in PAU group missing baseline value.

\*\* Higher scores on the health thermometer indicate better health.

396

### 397 Health Outcomes at Follow-up

398 For the K10 primary outcome at 6 months the mean difference for UBI compared to PAU arm  
 399 favoured the PAU arm (mean adjusted difference = 1.68, 95% CI -1.18 to 4.55; p = 0.255:  
 400 adjusted for age, gender, ethnicity, educational level, and NZiDep), as shown in Table 3 (where  
 401 positive differences indicate a better outcome for the PAU than UBI arm) While this result  
 402 indicated no significant difference in K10 scores between the UBI and PAU arms (see Figure 2),  
 403 each group had a reasonable improvement in K10 score from baseline (see Supplementary Table  
 404 R2: for the PAU group mean improvement = 7.6, 95% CI 5.5, 9.6; and for the UBI group mean  
 405 improvement = 5.9, 95% CI 4.0, 7.8).

Table 3. Mean difference in primary and secondary outcomes (difference in change relative to baseline)

| Outcome variable     | Mean adjusted difference (UBI minus PAU)* |       |                    |       |                     |       |
|----------------------|-------------------------------------------|-------|--------------------|-------|---------------------|-------|
|                      | 8 weeks                                   |       | 3 months           |       | 6 months            |       |
|                      | mean diff (95% CI)                        | p     | mean diff (95% CI) | p     | mean diff (95% CI)  | p     |
| Primary outcomes**   |                                           |       |                    |       |                     |       |
| K10                  | -0.19 (-2.55, 2.16)                       | 0.872 | 1.53 (-0.79, 3.84) | 0.203 | 1.68 (-1.18, 4.55)  | 0.255 |
| HADS                 | 0.57 (-1.68, 2.82)                        | 0.620 | 0.86 (-1.38, 3.10) | 0.456 | 1.85 (-0.62, 4.31)  | 0.149 |
| Secondary outcomes** |                                           |       |                    |       |                     |       |
| HADS-A               | 0.27 (-1.02, 1.56)                        | 0.684 | 0.70 (-0.60, 2.00) | 0.296 | 1.05 (-0.39, 2.50)  | 0.161 |
| HADS-D               | 0.39 (-0.82, 1.60)                        | 0.533 | 0.24 (-0.96, 1.44) | 0.701 | 0.88 (-0.38, 2.14)  | 0.178 |
| WSAS                 | 0.49 (-2.40, 3.38)                        | 0.740 | 1.32 (-1.58, 4.22) | 0.377 | 0.45 (-2.47, 3.37)  | 0.762 |
| Health Thermometer   | 2.84 (-3.64, 9.31)                        | 0.395 | 1.90 (-4.59, 8.39) | 0.569 | 4.93 (-1.77, 11.62) | 0.156 |

\* Positive differences indicate better improvement in PAU than UBI arm, adjusted for baseline value of score and age, gender, ethnicity, educational level, and NZiDep.

\*\* Number of participants contributing data to each analysis: UBI n = 70, PAU n = 69 (except for K10: PAU n = 68)

1  
2  
3 <insert Figure 2 about here>  
4  
5  
6

7 The mean adjusted difference on the HADS measure at 6 months between UBI and PAU  
8 measures was 1.85 (95% CI = -0.62, 4.31,  $p = 0.149$ ; see Table 3), though both groups again  
9 showed an improvement in mean score from baseline (Supplementary Table R1). Mean scores at  
10 each follow-up time are presented in Figure 3.  
11  
12  
13  
14

15  
16  
17 <insert Figure 3 about here>  
18  
19  
20

21 Similarly, for all secondary outcome measures (HADS Anxiety and Depression sub-scales,  
22 WSAS, and Health Thermometer), the adjusted difference in outcomes at 6 months showed no  
23 significant advantage for either UBI or PAU measures (with relatively broad confidence intervals  
24 for these differences: see Table 3.)  
25  
26  
27  
28

29 Estimates of secondary analyses of outcomes at earlier follow-up times (8 weeks and 3 months)  
30 are also presented in Table 3. Differences between UBI and PAU were generally most  
31 pronounced at the final follow-up (6 months) compared to the interim follow-ups. Trajectories  
32 for mean scores in each group are presented in Supplementary Figure R2, Supplementary Figure  
33 R3, Supplementary Figure R4 and Supplementary Figure R5.  
34  
35  
36  
37  
38

### 39 **Ancillary analyses**

40

41 Supplementary Table R3 presents information on types of additional treatment received for those  
42 who completed the 6-month follow-up assessment (summary not specified in protocol). Similar  
43 proportions of completing patients between study arms were either on medication for mental  
44 health condition(s) at the beginning on the trial (UBI = 31%; PAU 25%), or started medication  
45 during the trial (UBI=18%; PAU=25%). Access to extended GP consultations or counselling  
46 sessions was higher for the PAU arm than for UBI (no UBI patient had an extended GP  
47 consultation, compared to 29% of PAU patients; and 25% of UBI patients had one or more  
48 counselling sessions, compared to 64% of PAU patients.)  
49  
50  
51  
52  
53  
54  
55  
56  
57  
58  
59  
60

1  
2  
3 Intra-class correlation coefficients (ICCs) for the outcome measures are presented in  
4 Supplementary Table R4. For the K10 (ICC = 0.129, 95% CI 0.045 – 0.231) this was relatively  
5 close to the ICC values used in planning the sample size for the study. We also examined  
6 clustering effects for GPs as nested within GP practice clusters: this additional complexity (not  
7 implemented in our main analytical models) had little impact on ICCs for the K10 or HADS  
8 measures, though it did suggest slightly higher ICCs (greater clustering of outcomes than  
9 considering GPs alone) for the WSAS and Health Thermometer.

16 We also conducted three sensitivity analyses for our primary outcome of K10 scores at 6 months.  
17 These analyses are described in more detail in the Supplementary Methods and Results.

20 The first sensitivity analysis used the same linear mixed models analysis as the main reported  
21 analysis, but adjusted only for baseline values of the outcome score (as specified in the original  
22 protocol: no adjustment for other baseline covariates). This returned a slightly smaller mean  
23 difference between study arms (again with a poorer mean K10 score in UBI compared to PAU:  
24 difference = 1.07, 95% CI -1.67, 3.82; p=0.447) but does not control for the covariate imbalance  
25 seen in recruited participants (as shown in Table 1).

31 The second and third sensitivity analyses both aimed to consider the impact of loss-to-follow-up  
32 on the primary outcome analysis, assuming data were missing at random (MAR) or missing not  
33 at random (MNAR). Full details of implementation are in the Supplementary Methods. Both  
34 analyses include all randomised participants. An initial table gives the baseline covariates for  
35 those with and without follow-up in the PAU and UBI groups (Supplementary Table R5).

41 The analysis of outcomes under an MAR assumption (including all randomised participants) was  
42 almost identical to the main results (Supplementary Table R6). Analyses of outcomes under  
43 MNAR assumptions were also not substantively different from the main results (Supplementary  
44 Table R7): the most conservative result returned a mean difference of 2.03 points on the K10  
45 (95% CI -0.63, 4.70: Scenario 1 in Supplementary Table R7) which was slightly bigger than the  
46 mean difference seen in the main results (1.68 points, as per Table 3).

## 52 Discussion

1  
2  
3 The brief psychological treatment (UBI) delivered by GPs in New Zealand in routine practice  
4 settings did not lead to better outcomes than practice as usual (PAU) in this pragmatic efficacy  
5 trial, with the point estimate for the primary outcome favouring PAU over UBI.  
6  
7

8  
9 UBI appeared to be slightly less effective than PAU in reducing distress as measured by the K10  
10 (though the difference was not statistically significant). The K10 was originally introduced as an  
11 assessment measure of psychological distress, but has also been used to track change in mental  
12 health status following intervention [38]. There were no significant differences in the secondary  
13 measures either.  
14  
15  
16  
17

18  
19 We were unable to achieve full recruitment to match the pre-determined sample size: the study  
20 recruited 160 eligible participants across both study arms, against our target of 240 participants  
21 with complete data. As such, we were unable to rule out non-inferiority of the intervention (UBI)  
22 compared to PAU in reducing the disability and distress associated with mild to moderate mental  
23 health problems: the bounds of the confidence intervals for the two main outcomes (K10 and  
24 HADS measures) included sizable-magnitude better outcomes for PAU over UBI (e.g. the upper  
25 bound for the K10 was a 4.55 point advantage for PAU).  
26  
27  
28  
29  
30

31 Both UBI and PAU arms showed improvement in clinical outcome over the 6 month course of  
32 the study. These findings are in keeping with other work which demonstrates clinical  
33 effectiveness of brief psychological interventions in primary care settings [39].  
34  
35  
36  
37

38 These results suggest that GPs in both arms were achieving clinical benefit. We cannot rule out  
39 that UBI performs slightly worse than PAU, but our results are inconclusive due to our reduced  
40 sample size. For the last 10-20 years in many OECD jurisdictions there has been a focus on  
41 improving mental health care provision in primary care settings. In New Zealand this has taken  
42 the form of the introduction of locally based primary mental health initiatives, which have  
43 increased access to psychological services and provided opportunity for increased engagement  
44 (and remuneration) by General Practitioners to undertake mental health consultation work [9].  
45 These opportunities were available to the PAU, and may partially explain the relative success of  
46 this 'control' arm in the study.  
47  
48  
49  
50  
51  
52  
53

#### 54 ***Strengths of this study***

55  
56  
57  
58  
59  
60



1  
2  
3 We consider the results of this trial a useful addition to the literature for two reasons. Firstly they  
4 describe the introduction of potentially useful adjuncts to existing therapy approaches in primary  
5 care in a randomised controlled setting, and secondly the 'negative results' raise questions about  
6 the challenges of conducting pragmatic trials of psychological interventions in primary care and  
7 also about the nature and effectiveness of PAU treatments. Feedback received from GPs during  
8 the training sessions suggested that elements of the UBI such as active listening, goal-setting;  
9 making a specific plan and following up on it are already used in routine practice. UBI had  
10 previously been piloted and shown to be both feasible and acceptable to both clinicians and  
11 patients in a general practice setting [25]. It was also able to be adapted in a culturally  
12 responsive way [24]. During the course of the trial and following its completion there has been  
13 significant interest expressed by both patients and GPs in obtaining copies of the booklets and  
14 using elements of the UBI approach in routine consultations. Verbal feedback suggests that GPs  
15 particularly liked the helpful/unhelpful behaviour chart which was used to discuss how problems  
16 were maintained, the explicit linking of emotional responses to physical symptoms and the use of  
17 commitment and capability rulers (a motivational interviewing strategy).  
18  
19  
20  
21  
22  
23  
24  
25  
26  
27  
28  
29

30 There is an active debate about the optimal balance of intervention components for the  
31 management of common mental health problems, with an increasingly varied range of options  
32 available. Patients potentially have access to traditional face to face intervention with a therapist,  
33 access to materials available on the internet, and further access to rapidly developing  
34 telemedicine and virtual consultation options [40, 41]. Our study shows that over the course of  
35 the trial, patients and GPs were able to adapt the standard pattern of the GP consultation to a  
36 series of three sessions, allowing a more participation from the patient. This ability to 'disrupt'  
37 the traditional pattern of GP consultations is important in an era where there is recognition in  
38 New Zealand and other OECD countries about the need to respond to the changing context of  
39 primary care, particularly in relation to long term conditions including common mental health  
40 problems [42].  
41  
42  
43  
44  
45  
46  
47  
48  
49

50 The choice of 4 points for a minimal clinically important difference on the K10 measure was  
51 selected on the basis of past work [9]. Subsequent research suggests a minimum clinically  
52 important difference of around 7 points (measured in younger people accessing services [43]). In  
53 retrospect, the selection of a smaller difference to detect for the sample size calculation does not  
54  
55  
56  
57  
58  
59  
60

1  
2  
3 affect the interpretation of results as the current study would have had more than 80% power to  
4 detect this revised larger difference between study groups. The original sample size calculation  
5 also indicated that full recruitment would have achieved 80% power to detect a difference of 3.2  
6 points on the HADS scale: this was a slightly bigger difference than the minimal clinically  
7 important difference cited in the literature [44].  
8  
9  
10  
11  
12

13 We also examined the impact of analytical decisions on our primary outcome, particularly  
14 sensitivity analyses examining the potential impact of participants with no post-baseline data  
15 (excluded from the main analysis) on the reported intervention effect. There was more loss-to-  
16 follow-up observed in the UBI group than in the PAU group. These sensitivity analyses showed  
17 relatively little impact on our estimates under several sets of assumptions (Supplementary  
18 Methods and Results).  
19  
20  
21  
22  
23

### 24 ***Limitations***

25  
26  
27 The difficulties in recruiting a sufficient sample size meant we were unable to establish benefit  
28 or rule out substantial inferiority of UBI compared to PAU. The main challenges of recruitment  
29 for trials in mental health have been described [45-47]. The current study contained specific  
30 additional challenges as outlined below.  
31  
32  
33  
34  
35

36 Firstly, our recruitment was limited by specific entry criteria. We would have preferred to  
37 include all adults aged 18-65 with K10's exceeding 35, but our partner PHO was required to  
38 limit access to services to clients within the targeted access criteria. This reduced our ability to  
39 recruit our planned sample size.  
40  
41  
42

43 This meant we did not meet our planned sample size target despite energetic problem-solving  
44 over a 3 year recruitment period. It also meant that many GPs were not able to recruit any  
45 patients (n=60 of the recruited GPs) or were not using the UBI tool until weeks or even months  
46 after training. This casts doubt on how well GPs would have adhered to the approach or recalled  
47 the principles, potentially affecting the quality of the intervention delivered.  
48  
49  
50  
51  
52

53  
54 Secondly, in this New Zealand context, the GPs in the PAU group had access to a sophisticated  
55 range of therapy options which included providing extended consultations themselves, as well as  
56  
57  
58  
59

1  
2  
3 referring patients to psychological therapies such as counselling or CBT delivered by clinical  
4 psychologists (Dowell 2009). In addition, during the course of the study there were significant  
5 changes to the way in which the external psychological services were delivered in our local  
6 PHO, with therapists (mental health professionals) being placed within practices rather than at a  
7 central location making it easier for in-house referral. Thus the results may not generalise to  
8 settings where these additional therapies are unavailable in day-to-day practice.  
9

10  
11  
12  
13  
14 These changes made the task of demonstrating non-inferiority more challenging. UBI is  
15 consistent with the contemporary primary care stepped care approach that tailors interventions to  
16 symptom severity and response to treatment [48]. The intervention tool (UBI) used in this study  
17 was developed for sub-threshold mental health syndromes, but was, in practice, applied to  
18 moderate-to-severe problems, due to demand from GPs who said they needed higher thresholds  
19 in order to be able to recruit patients. In the New Zealand context it appears those needing mental  
20 health interventions in primary care have more severe problems than the tool was intended for.  
21 The intervention may have performed relatively better than PAU if applied to a mild-to-moderate  
22 group, but this would need further research to ascertain. The moderate-to-severe group are likely  
23 to require longer, more intensive interventions for it to make a difference.  
24  
25  
26  
27  
28  
29  
30  
31

32  
33 Given the known efficacy of the PAU intervention in this setting [9], the results also attest to the  
34 success of the PAU options rather than a specific failing of the intervention. Clinicians who  
35 participated in this study might be expected to be those who were motivated and skilled in  
36 supporting patients with mental health problems. It is unclear in this case the extent to which the  
37 GPs in the UBI treatment arm were adhering to the structured approach outlined in the treatment  
38 manual. Fidelity and adherence to training for psychological intervention has been subject to  
39 commentary in the literature [49, 50] and it is unclear as to the extent to which UBI GPs were  
40 able to adhere to the structured manual.  
41  
42  
43  
44  
45  
46

47  
48 The analyses presented here examined several arising issues that were not planned for at the start  
49 of the study. Firstly, there were imbalances on some demographic variables (gender and age  
50 group) between the two study arms. While this is sub-optimal, the analysis of primary and  
51 secondary outcomes adjusted for these and other sociodemographic factors, which means that  
52 these imbalances should be accounted for in the results.  
53  
54  
55  
56  
57  
58  
59  
60

## Conclusion

In this study both the PAU and UBI groups showed improvement in clinical outcome, despite UBI failing to demonstrate superiority or conclusive non-inferiority compared to PAU. This leaves open the question of whether this style of intervention may have potential value in a primary care setting, or whether some elements of this style of intervention are already being applied in practice by some clinicians. Either way, our results did not show that the UBI added value to usual care with patients with moderate-to-severe symptoms.

An ultra-brief approach such as UBI may add value if restricted to patients with mild mental health problems, as part of a suite of options, with different levels of intensity available to GPs in the primary care setting.

There is a significant need for further research into these issues, given the recognition of mental health problems at a community level [6, 51] and the challenge of providing access to psychological therapy in an effective and cost-effective way [52, 53].

## Figure Legends

Figure 1. Study flowchart of patient participation.

Figure 2. Mean K10 score (95% CI) at baseline and follow up for UBI and PAU study arms.

Figure 3. Mean total HADS score (95% CI) at baseline and follow up for UBI and PAU study arms.

## Abbreviations

UBI: Ultra-brief intervention; PAU: Practice as Usual; GP: General Practitioner; PHO: Primary Health Organisation; K10: Kessler Psychological Distress Scale; HADS: Hospital Anxiety and Depression Scale; WSAS: Work and Social Adjustment Scale; NZDep2006: New Zealand index of individual socioeconomic deprivation.

## Authors' contributions

All authors contributed to the study design and study protocol. FM and SC are co-principal investigators. SC conceived the study, obtained initial funding, and contributed to the

1  
2  
3 development of the intervention. FM and RT obtained co-funding. FM largely developed the  
4 intervention, led GP training and PHO liaison. AD contributed to the intervention design and GP  
5 training. JS contributed to the study design and designed and conducted the analysis. JS, FM, AD  
6 and SC jointly interpreted the results. RT contributed as research assistant, assisted with practice  
7 recruitment and GP training, led the patient recruitment, data collection, processing and project  
8 management in the latter stages. All authors contributed to and approved the final manuscript.  
9  
10  
11  
12  
13

## 14 **Funding**

15  
16  
17 Funding for this study was received from the local partner PHO, Compass Health, The Oakley  
18 Mental Health Research Foundation, Wellington Medical Research Foundation, and the  
19 University of Otago Research Fund. Funding was also received from the Health Research  
20 Council of New Zealand for the initial feasibility study, and from Oakley Mental Health  
21 Research Foundation and the University of Otago Research Fund for the Māori adaptation. The  
22 funding bodies had no role in the study design, collection, analysis and interpretation of data or  
23 in the writing of the manuscript.  
24  
25  
26  
27  
28  
29

## 30 **Competing Interests**

31  
32 None  
33  
34

## 35 **Acknowledgements**

36  
37 Thanks to Gabrielle Jenkin, who managed the project in the early phases; Felicity Goodyear  
38 Smith, Simon Hatcher and Sarah Gordon, who contributed to the study design in the early  
39 phases; Amy Munstermann who facilitated liaison with Compass Health; Brigitte Lane, who  
40 recruited practices and led the data collection for the first year and Denise Steers who  
41 contributed as a research assistant.  
42  
43  
44  
45  
46

## 47 **Data sharing**

48  
49 Individual-level patient data are not available to other researchers as participants were not asked  
50 for consent to share their data. The study protocol (including statistical analysis plan) is available  
51 at [27] (DOI:10.1186/s13063-015-0778-y). The code used to conduct the statistical analysis is  
52 available from the second author on request (james.stanley@otago.ac.nz).  
53  
54  
55  
56  
57  
58  
59  
60

## References

1. Oakley-Browne M, Wells J, Scott K. Te Rau Hingengaro: The New Zealand Mental Health Survey. Wellington: Ministry of Health; 2006.
2. Greenberg PE, Kessler RC, Birnbaum HG, et al. The economic burden of depression in the United States: How did it change between 1990 and 2000? *The Journal of Clinical Psychiatry*. 2003;64(12):1465-75.
3. Wang PS, Simon G, Kessler RC. The economic burden of depression and the cost-effectiveness of treatment. *International Journal of Methods in Psychiatric Research*. 2003;12(1):22-33.
4. Horton R. Understanding disease, injury and risk. *The Lancet*. 2012;380:2053-4.
5. Thornicroft G, Chatterji S, Evans-Lacko S, et al. Undertreatment of people with major depressive disorder in 21 countries. *The British Journal of Psychiatry*. 2017;210(2):119-24.
6. The MaGPIe Research Group. The nature and prevalence of psychological problems in New Zealand primary health care: a report on Mental Health and General Practice Investigation. 2003. Contract No.: 1171.
7. Layard R, Clark D, Bell S, et al. The depression report; A new deal for depression and anxiety disorders. London School of Economics; 2006.
8. Hollinghurst S, Kessler D, Peters TJ, et al. Opportunity cost of antidepressant prescribing in England: Analysis of routine data. *BMJ: British Medical Journal*. 2005;330(7498):999-1000.
9. Dowell A, Garrett S, Collings S, et al. Evaluation of the Primary Mental Health Initiatives: summary report 2008. Wellington: Otago University Wellington and Ministry of Health; 2009.
10. The MaGPIe Research Group. The treatment of common mental health problems in general practice. *Fam Pract*. 2006;23:53-9.
11. Mathieson F, Collings S, Dowell A. Sub-threshold mental health syndromes: Finding an alternative to the medication of unhappiness. *Journal of Primary Health Care*. 2009;1(1):74-7.
12. American Psychiatric Association. Diagnostic and statistical manual of mental disorders (5th ed.). Washington, DC2013.
13. Wagner H, Burns B, Broadhead W, et al. Minor depression in family practice: functional morbidity, co-morbidity, service utilisation and outcomes. *Psychological Medicine*. 2000;30:1377-90.
14. Collings S, MaGPIe Research Group. Disability and the detection of mental disorder in primary care. *Soc Psychiatry Psychiatr Epidemiol*. 2005;40(12):994-1002.
15. Kessler R, Zhao S, Blazer D, et al. Prevalence, correlates, and course of minor depression in the national comorbidity survey. *Journal of Affective Disorders*. 1997;45(1-2):19-30.
16. Sadek N, Bona J. Subsyndromal symptomatic depression: a new concept. *Depression and Anxiety*. 2000;12:30-9.
17. Dowell A, Garrett S, Collings S, et al. Primary Mental Health Initiatives: Interim Report. Wellington: School of Medicine & Health Sciences, University of Otago, Wellington; 2007.
18. Dew K, Dowell A, McLeod D, et al. "This glorious twilight zone of uncertainty": mental health consultations in general practice in New Zealand. *Social Science & Medicine* 2005;61(6):1189-200.
19. Mathieson F, Collings S, Dowell A, et al. Collaborative research: A case example of dissemination of CBT in primary care. *the Cognitive Behaviour Therapist Vol 6 2013, ArtID e4*. 2013;6.
20. Kessler D, Lewis G, Kaur S, et al. Therapist-delivered internet psychotherapy for depression in primary care: A randomised controlled trial. *The Lancet*. 2009;374(9690):628-34.
21. Jorm AF, Griffiths KM. Population promotion of informal self help strategies for early intervention against depression and anxiety. *Psychological Medicine*. 2006;36:3-6.



22. Gellatly J, Bower P, Hennessy S, et al. What makes self-help interventions effective in the management of depressive symptoms? Meta-analysis and meta-regression. *Psychological Medicine*. 2007;37(9):1217-28.
23. Gellatly J, Chisnall L, Seccombe N, et al. @Home eTherapy Service for People with Common Mental Health Problems: An Evaluation. *Behavioural and Cognitive Psychotherapy*. 2017:1-6.
24. Mathieson F, Mihaere K, Collings S, et al. Maori cultural adaptation of a brief mental health intervention in primary care. *Journal of Primary Health Care*. 2012;4(3):231-8.
25. Collings S, Mathieson F, Dowell A, et al. Acceptability of a guided self-help mental health intervention in general practice. *Fam Pract*. 2012;29(1):43-9.
26. Kessler R, Andrews G, Clope LJ, et al. Short screening scales to monitor population prevalences and trends in non-specific psychological distress. *Psychological Medicine*. 2002;32:959-76.
27. Collings S, Mathieson F, Dowell A, et al. Clinical effectiveness of an ultra-brief intervention for common mental health syndromes in primary care: study protocol for a cluster randomized controlled trial. *Trials*. 2015;16(260):1-7.
28. Andrews G, Slade T. Interpreting scores on the Kessler Psychological Distress Scale (K10). *Australian and New Zealand Journal of Public Health*. 2001;25(6):494-7.
29. Ministry of Health. Ethnicity Data Protocols for the Health and Disability Sector. In: Health Mo, editor. Wellington, New Zealand 2004.
30. Zigmond AS, Snaith RP. The hospital anxiety and depression scale. *Acta Psychiatrica Scandinavica*. 1983;67(6):361-70.
31. Mundt JC, Marks IM, Shear MK, et al. The work and social adjustment scale: a simple measure of impairment in functioning. *British Journal of Psychiatry*. 2002;180:461-4.
32. Spinhoven P, Ormel J, Sloekers PP, et al. A validation study of the Hospital Anxiety and Depression Scale (HADS) in different groups of Dutch subjects. *Psychological Medicine*. 1997;27(2):363-170.
33. Bates D, Maechler M, Bolker B, et al. Fitting Linear Mixed-Effects Models Using lme4. *Journal of Statistical Software*. 2015;67(1):1-48.
34. van Buuren S, Groothuis-Oudshoorn K. Mice: Multivariate Imputation by Chained Equations in R. *Journal of Statistical Software*. 2011;45(3):1-67.
35. DeSouza CM, Legedza AT, Sankoh AJ. An overview of practical approaches for handling missing data in clinical trials. *Journal of Biopharmaceutical Statistics*. 2009;19(6):1055-73.
36. Beunckens C, Molenberghs G, Kenward MG. Direct likelihood analysis versus simple forms of imputation for missing data in randomized clinical trials. *Clinical Trials*. 2005;2(5):379-86.
37. Sullivan TR, White IR, Salter AB, et al. Should multiple imputation be the method of choice for handling missing data in randomized trials? *Statistical Methods in Medical Research* 2018;27(9):2610-26.
38. Sunderland M, Wong N, Hilvert-Bruce Z, et al. Investigating trajectories of change in psychological distress amongst patients with depression and generalised anxiety disorder treated with internet cognitive behavioural therapy. *Behaviour research and therapy*. 2012;Jun 30;50(6):374-80.
39. Cape J, Whittington C, Buszewicz M, et al. Brief psychological therapies for anxiety and depression in primary care: meta-analysis and meta-regression. 2010;8(38).
40. Gilbody S, Littlewood E, Hewitt C, et al. Computerised cognitive behaviour therapy (cCBT) as treatment for depression in primary care (REACT trial): large scale pragmatic randomised controlled trial. *British Medical Journal*. 2015;351(h5627).
41. Andersson G, Carlbring P, Hadjistavropoulos HD. Internet-based cognitive behavior therapy. *The science of cognitive behavioral therapy*. San Diego, CA: Elsevier Academic Press; US; 2017. p. 531-49.
42. Baird M, Blount A, Brungardt S, et al. Joint principles: integrating behavioral health care into the patient-centered medical home. *The Annals of Family Medicine*. 2014;12(2):183-5.

- 1  
2  
3 43. Rickwood D, Mazzer K, Telford N, et al. Changes in psychological distress and psychosocial  
4 functioning in young people visiting headspace centres for mental health problems. *The Medical Journal*  
5 *of Australia*. 2015;202(10):537-42.
- 6 44. Puhan MA, Frey M, Buchi S, et al. The minimal important difference of the hospital anxiety and  
7 depression scale in patients with chronic obstructive pulmonary disease. *Health and Quality of Life*  
8 *Outcomes*. 2008;6(46).
- 9 45. Weisfeld V, English RA, Claiborne AB. *Public Engagement and Clinical Trials: New Models and*  
10 *Disruptive Technologies: Workshop Summary*.: National Academies Press; 2012.
- 11 46. McDonald AM, Knight RC, Campbell MK, et al. What influences recruitment to randomised  
12 controlled trials? A review of trials funded by two UK funding agencies. *Trials*. 2006;7(7):1-9.
- 13 47. Mason VL, Shaw A, Wiles NJ, et al. GPs' experiences of primary care mental health research: a  
14 qualitative study of the barriers to recruitment. *Fam Pract*. 2007;24(5):518-25.
- 15 48. Dowell A, Morris C, Dodds T, et al. Psychological interventions in primary care mental health. In:  
16 G. I, editor. *Companion to Primary Care Mental Health*. London: Radcliffe Publishing; 2012.
- 17 49. Bellg AJ, Borrelli B, B. R, et al. Enhancing treatment fidelity in health behavior change studies:  
18 best practices and recommendations from the NIH Behavior Change Consortium. *Health Psychology*.  
19 2004;23(5):443-51.
- 20 50. Morton L, Elliott A, Thomas R, et al. Developmental study of treatment fidelity, safety and  
21 acceptability of a Symptoms Clinic intervention delivered by General Practitioners to patients with  
22 multiple medically unexplained symptoms. *Journal of psychosomatic research*. 2016;May 31(84):37-43.
- 23 51. Whiteford HA, Degenhardt L, Rehm J, et al. Global burden of disease attributable to mental and  
24 substance use disorders: findings from the Global Burden of Disease Study 2010. *The Lancet*. 2013;Nov  
25 15;382(9904): 1575-86.
- 26 52. Gyani A, Shafran R, Layard R, et al. Enhancing recovery rates: lessons from year one of IAPT.  
27 *Behaviour Research and Therapy*. 2013;Sep 30;51(9):597-606.
- 28 53. Clark DM. Implementing NICE guidelines for the psychological treatment of depression and  
29 anxiety disorders: the IAPT experience. *International review of psychiatry*. 2011;Aug 1;23(4):318-27.
- 30  
31  
32  
33  
34  
35  
36  
37  
38  
39  
40  
41  
42  
43  
44  
45  
46  
47  
48  
49  
50  
51  
52  
53  
54  
55  
56  
57  
58  
59  
60





# CONSORT

TRANSPARENT REPORTING of TRIALS

## CONSORT 2010 Flow Diagram

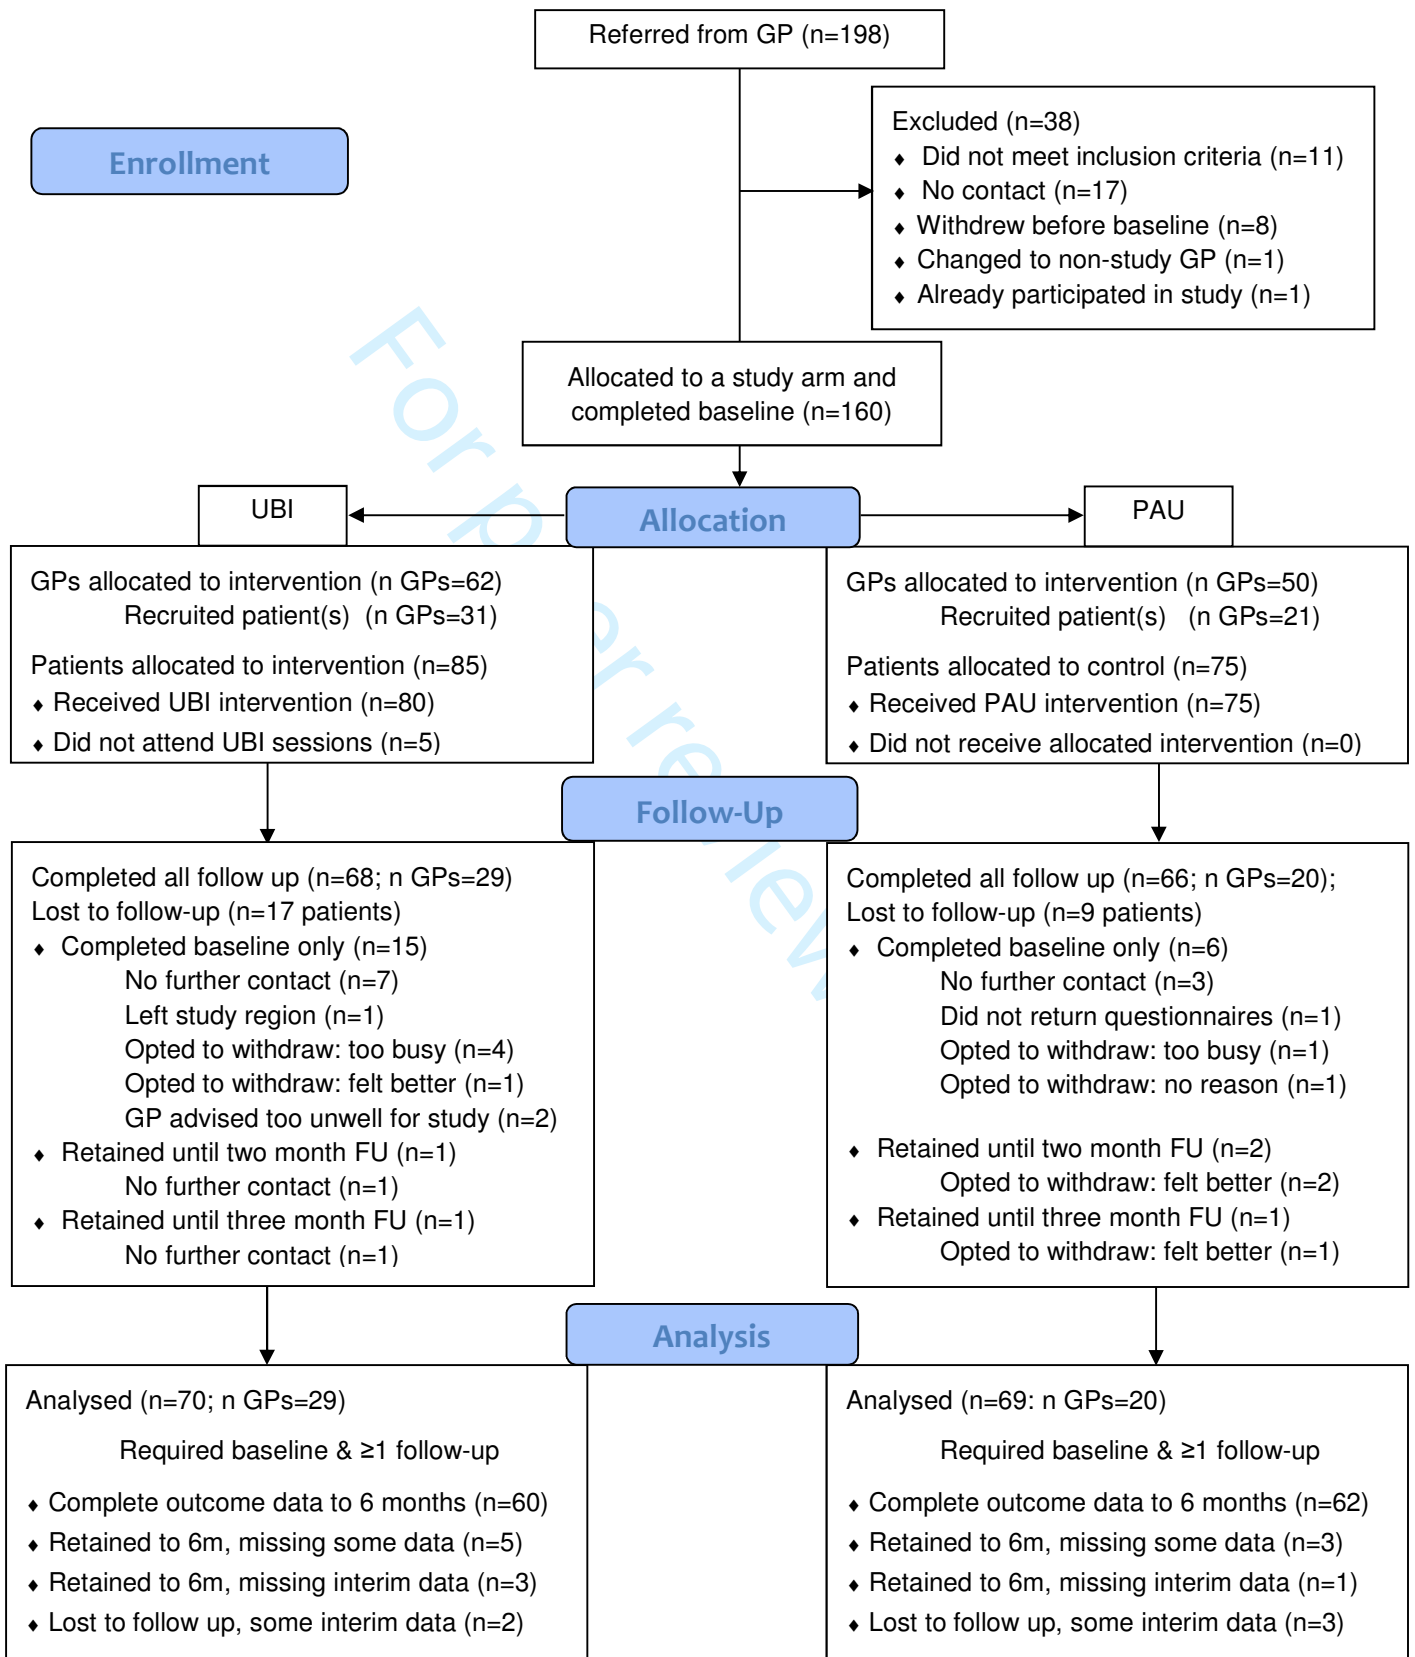

1  
2  
3  
4  
5  
6  
7  
8  
9  
10  
11  
12  
13  
14  
15  
16  
17  
18  
19  
20  
21  
22  
23  
24  
25  
26  
27  
28  
29  
30  
31  
32  
33  
34  
35  
36  
37  
38  
39  
40  
41  
42  
43  
44  
45  
46  
47  
48  
49  
50  
51  
52  
53  
54  
55  
56  
57  
58  
59  
60



Figure 2. Mean K10 score (95% CI) at baseline and follow up for UBI and PAU study arms.

90x90mm (300 x 300 DPI)

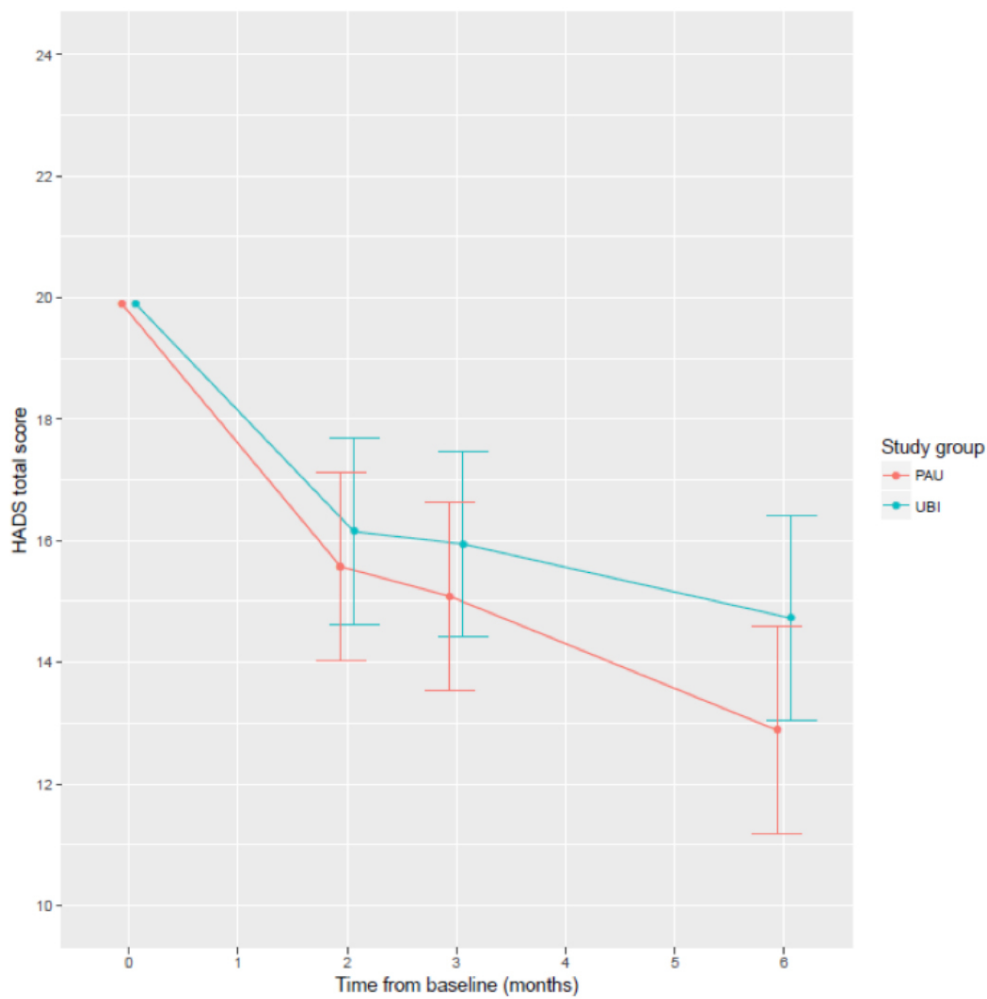

Figure 3. Mean total HADS score (95% CI) at baseline and follow up for UBI and PAU study arms.

90x90mm (300 x 300 DPI)

Supplementary Figure R1. Boxplots of baseline scores for each outcome measure (dots show each individual's score on that measure).

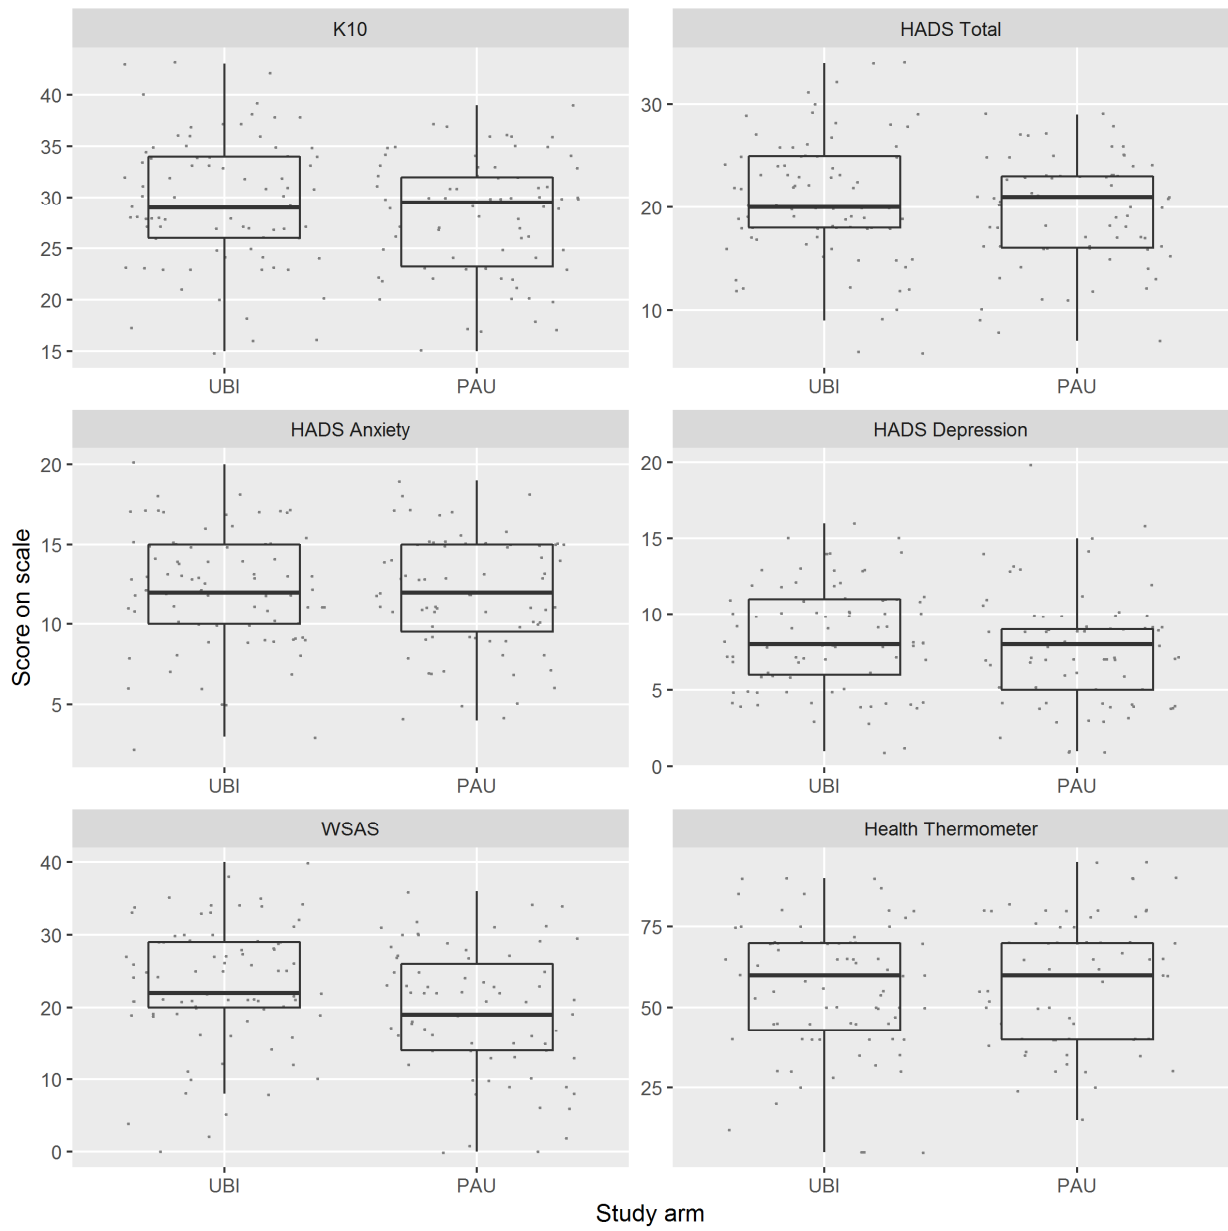

Supplementary Table R1. Number of patients recruited into study by GPs in UBI and PAU study arms.

| Number of patients recruited by GP | UBI<br>(n GPs*) | PAU<br>(n GPs*) |
|------------------------------------|-----------------|-----------------|
| 1                                  | 12              | 8               |
| 2                                  | 4               | 2               |
| 3                                  | 7               | 5               |
| 4                                  | 3               | 0               |
| 5                                  | 1               | 2               |
| 6                                  | 2               | 0               |
| 7                                  | 1               | 0               |
| 8                                  | 1               | 1               |
| 9                                  | 0               | 2               |
| 12                                 | 0               | 1               |
| <b>Total number of GPs</b>         | <b>31</b>       | <b>21</b>       |

\* Indicates the number of GPs recruiting the stated number of patients (e.g. 12 GPs in the UBI arm recruited one patient each; and five GPs in the PAU arm recruited three patients each).

Supplementary Table R2. Mean improvements from baseline to 6 month follow-up for each outcome measure.

| Outcome measure    | Mean at baseline<br>(both arms) | Mean improvement (95% CI)<br>from baseline to 6 months |                 |
|--------------------|---------------------------------|--------------------------------------------------------|-----------------|
|                    |                                 | PAU                                                    | UBI             |
| K10                | 28.8                            | 7.6 (5.5, 9.6)                                         | 5.9 (4.0, 7.8)  |
| HADS               | 19.9                            | 7.0 (5.3, 8.7)                                         | 5.2 (3.5, 6.9)  |
| HADS-A             | 12                              | 4.3 (3.3, 5.3)                                         | 3.2 (2.2, 4.2)  |
| HADS-D             | 7.9                             | 2.8 (1.9, 3.7)                                         | 1.9 (1.0, 2.8)  |
| WSAS               | 21.3                            | 7.7 (5.7, 9.7)                                         | 7.2 (5.3, 9.2)  |
| Health Thermometer | 57.5                            | 14.0 (9.3, 18.6)                                       | 9.0 (4.4, 13.7) |

1  
2  
3  
4  
5  
6  
7  
8  
9  
10  
11  
12  
13  
14  
15  
16  
17  
18  
19  
20  
21  
22  
23  
24  
25  
26  
27  
28  
29  
30  
31  
32  
33  
34  
35  
36  
37  
38  
39  
40  
41  
42  
43  
44  
45  
46  
47  
48  
49  
50  
51  
52  
53  
54  
55  
56  
57  
58  
59  
60

Supplementary Figure R2. Mean HADS Anxiety score (95% CI) at baseline and follow up for UBI and PAU study arms.

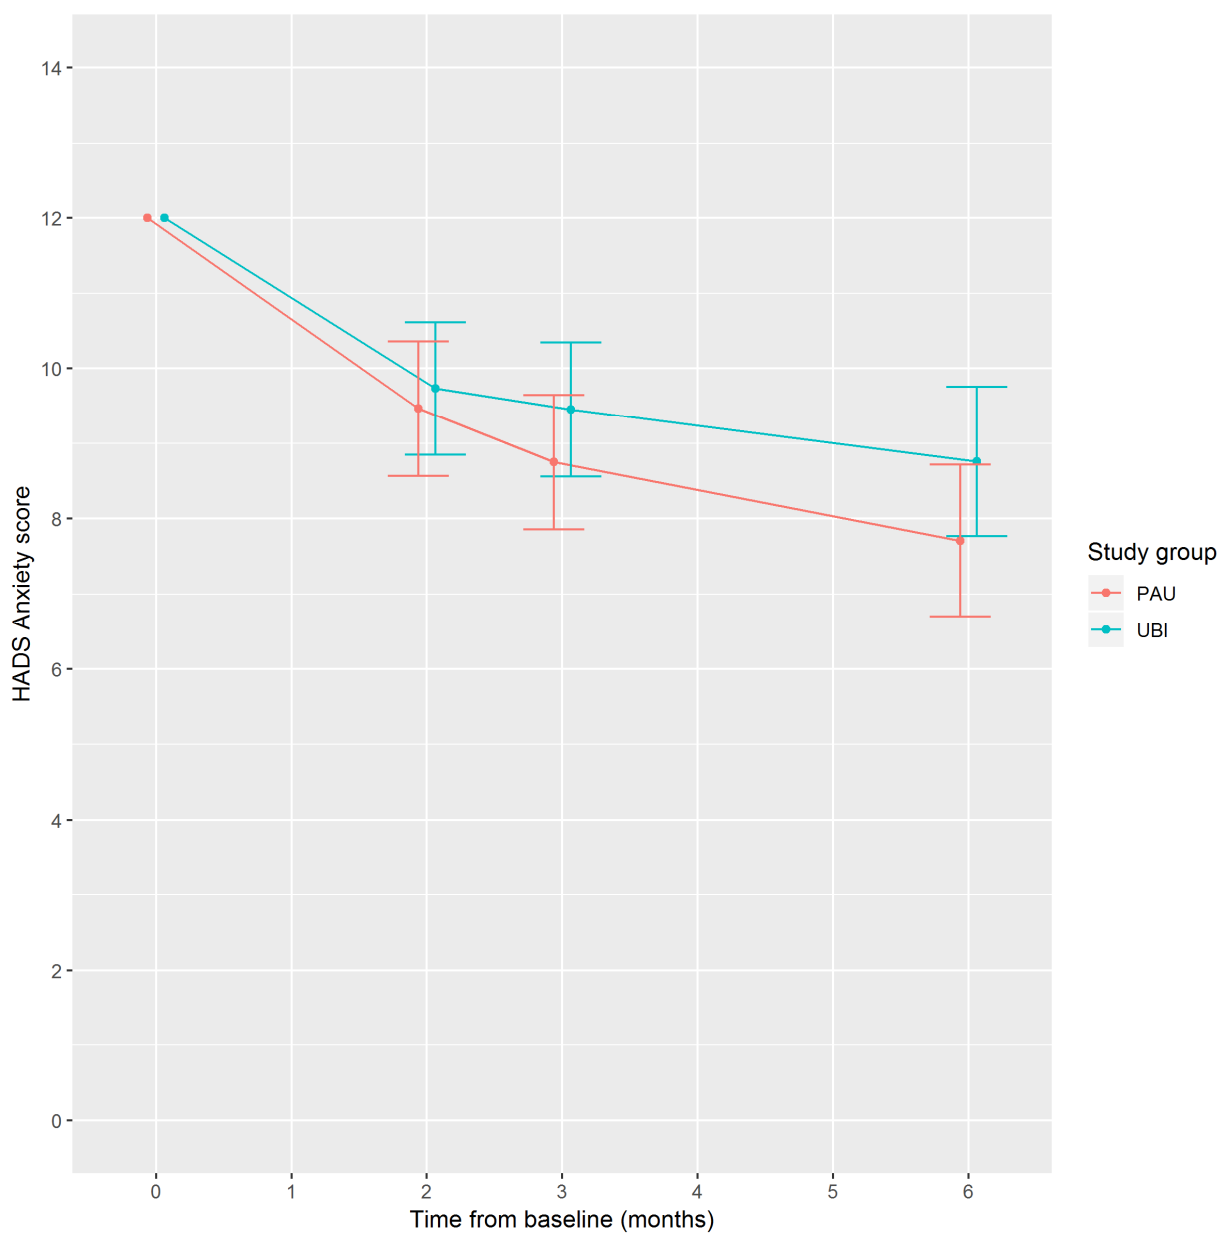

Supplementary Figure R3. Mean HADS Depression score (95% CI) at baseline and follow up for UBI and PAU study arms.

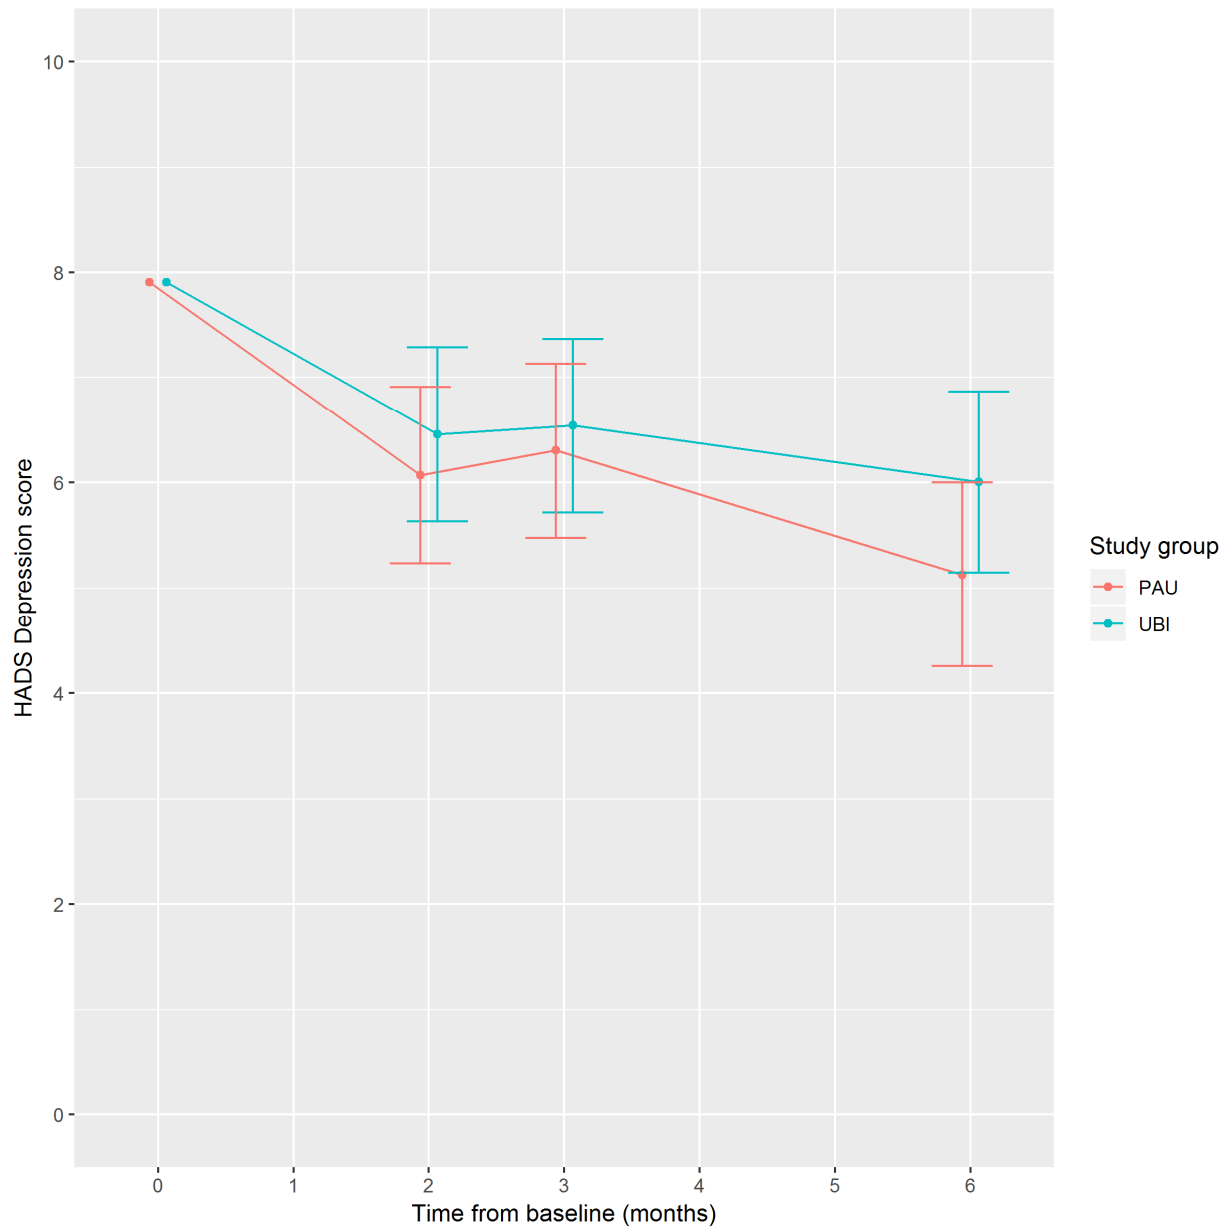

1  
2  
3  
4  
5  
6  
7  
8  
9  
10  
11  
12  
13  
14  
15  
16  
17  
18  
19  
20  
21  
22  
23  
24  
25  
26  
27  
28  
29  
30  
31  
32  
33  
34  
35  
36  
37  
38  
39  
40  
41  
42  
43  
44  
45  
46  
47  
48  
49  
50  
51  
52  
53  
54  
55  
56  
57  
58  
59  
60

Supplementary Figure R4. Mean WSAS score (95% CI) at baseline and follow up for UBI and PAU study arms.

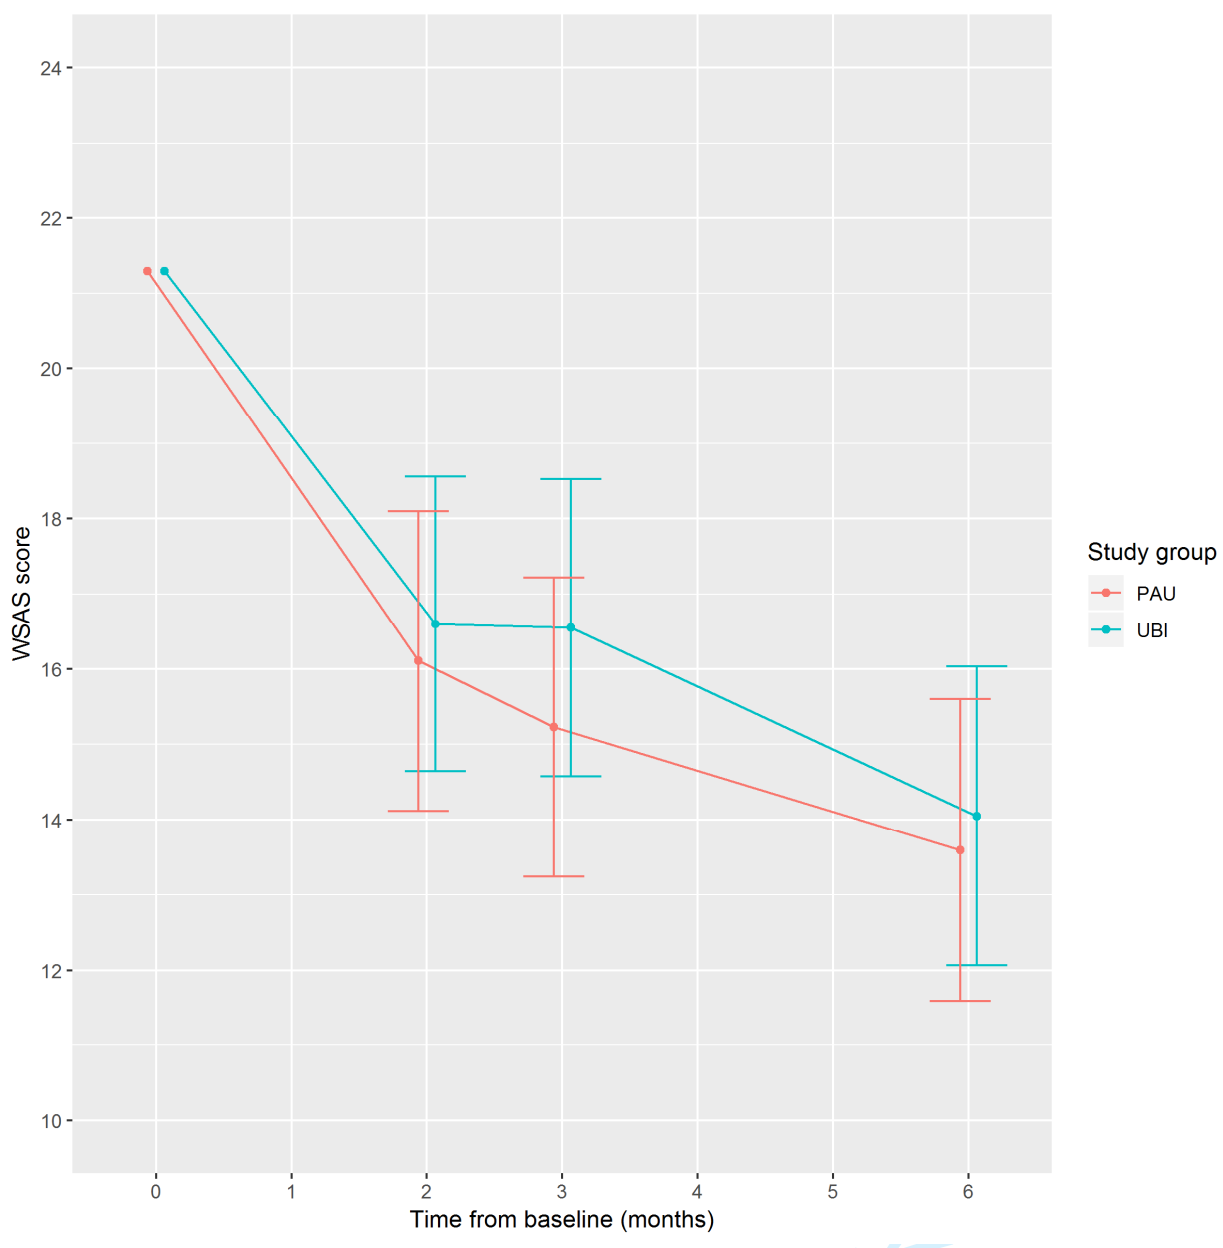



Supplementary Figure R5. Mean Health Thermometer score (95% CI) at baseline and follow up for UBI and PAU study arms.

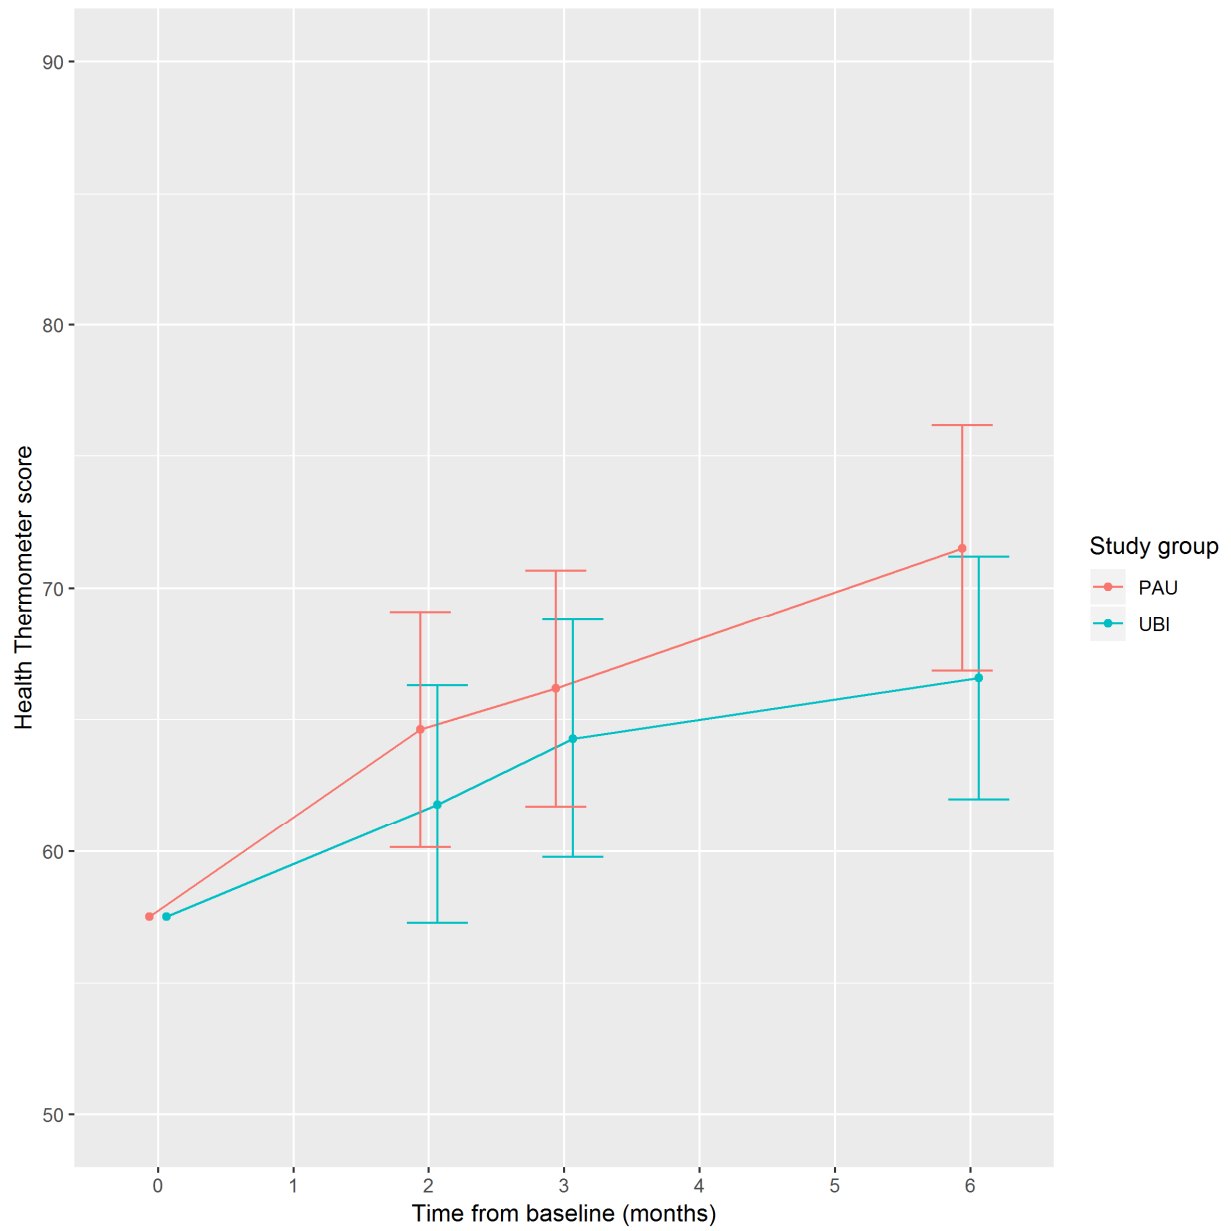

Supplementary Table R3. Additional treatment received during UBI trial (from question on 6 month interview)

| Type of additional treatment          | UBI<br>n (%) | PAU<br>n (%) |
|---------------------------------------|--------------|--------------|
| <b>Medication status during trial</b> |              |              |
| no relevant medication                | 33 (51%)     | 34 (52%)     |
| on medication prior to entering trial | 20 (31%)     | 16 (24%)     |
| started medication during trial       | 12 (18%)     | 16 (24%)     |
| did not complete question*            | 20           | 9            |
| <b>Extended GP consultations (n)</b>  |              |              |
| 0                                     | 68 (100%)    | 46 (71%)     |
| 1-2                                   | 0            | 8 (12%)      |
| 3-5                                   | 0            | 9 (14%)      |
| 6-10                                  | 0            | 2 (3%)       |
| did not complete question*            | 17           | 10           |
| <b>Counselling sessions (n)</b>       |              |              |
| 0                                     | 44 (75%)     | 21 (36%)     |
| 1-2                                   | 4 (7%)       | 13 (22%)     |
| 3-5                                   | 2 (3%)       | 11 (19%)     |
| 6-10                                  | 7 (12%)      | 12 (20%)     |
| 11+                                   | 2 (3%)       | 2 (3%)       |
| did not complete question*            | 26           | 16           |

\* Did not complete 6 month questionnaire and hence no data (UBI n=16; PAU n=9)

Did not answer Meds question at 6 months (UBI: n=4; PAU: n=1)

Did not answer Extended GP question at 6 months (UBI: n=1; PAU: n=1)

Did not answer Counselling question at 6 months (UBI: n=10; PAU: n=7)

Supplementary Methods: Calculation of intra-class correlation coefficients (ICCs) for outcome measures.

ICCs were calculated for each outcome measure in the study to summarise the impact of clustering of outcomes by GPs. These were calculated using simplified mixed linear models with random intercept terms for GPs and no adjustment for covariates. ICCs were calculated in R 3.2.3, using the lme4 package, with their 95% confidence intervals based on 1000 bootstrap resamples calculated using the bootMer() function.

ICCs were also calculated for a scenario where clustering was considered across both the individual GPs (as per the above paragraph) and the practices in which GPs worked. The difference between these two sets of estimates can be considered as the additional impact of clustering of patient responses induced by practices above and beyond clustering induced by GPs. As seen in Supplementary Table R4, there was little impact of this additional clustering on ICCs for the longer health measures (K10 and HADS: minimal difference in ICCs between the two adjustment scenarios) but there appeared to be some additional impact of practice-level clustering for the Work and Social Adjustment Scale (WSAS) and the one-item Health Thermometer.

Supplementary Table R4. Intra-class correlation coefficients (ICCs) for each outcome measure in the study.

| Outcome measure    | GP clustering only* |                | GP and Practice clustering** |                 |
|--------------------|---------------------|----------------|------------------------------|-----------------|
|                    | ICC                 | (95% CI)       | ICC                          | (95% CI)        |
| K10                | 0.129               | (0.045, 0.231) | 0.139                        | (0.006, 0.235)  |
| HADS (total)       | 0.091               | (0.019, 0.189) | 0.104                        | (<0.001, 0.185) |
| HADS Anxiety       | 0.098               | (0.019, 0.198) | 0.106                        | (<0.001, 0.190) |
| HADS Depression    | 0.140               | (0.047, 0.250) | 0.148                        | (0.018, 0.233)  |
| WSAS               | 0.188               | (0.081, 0.308) | 0.240                        | (0.076, 0.348)  |
| Health Thermometer | 0.088               | (0.013, 0.177) | 0.135                        | (0.005, 0.219)  |

\* ICC calculated using only GP-level random effects.

\*\* ICC calculated using random effects for GPs nested within GP practices (joint clustering effect).

Reference for lmer package:

Douglas Bates, Martin Maechler, Ben Bolker, Steve Walker (2015). Fitting Linear Mixed-Effects Models Using lme4. Journal of Statistical Software, 67(1), 1-48. doi:10.18637/jss.v067.i01.

Supplementary Table R5. Sociodemographic and clinical characteristics at baseline by intervention arm (UBI or Practice as Usual [PAU]) and follow-up status.

| Factor                     | Level               | UBI follow-up (FU) status |             | PAU follow-up (FU) status |             |
|----------------------------|---------------------|---------------------------|-------------|---------------------------|-------------|
|                            |                     | Lost to FU                | some FU     | Lost to FU                | some FU     |
| Total                      | All participants    | 15 (100%)                 | 70 (100%)   | 6 (100%)                  | 69 (100%)   |
| Ethnicity                  | NZE Other           | 10 (67%)                  | 51 (73%)    | 5 (83%)                   | 49 (71%)    |
|                            | Māori               | 5 (33%)                   | 14 (20%)    | 1 (17%)                   | 13 (19%)    |
|                            | Pacific             | 0 (0%)                    | 4 (6%)      | 0 (0%)                    | 2 (3%)      |
|                            | Asian               | 0 (0%)                    | 1 (1%)      | 0 (0%)                    | 5 (7%)      |
| Age grp                    | 15-24               | 11 (73%)                  | 44 (63%)    | 6 (100%)                  | 31 (45%)    |
|                            | 25-34               | 2 (13%)                   | 14 (20%)    | 0 (0%)                    | 15 (22%)    |
|                            | 35-44               | 1 (7%)                    | 2 (3%)      | 0 (0%)                    | 13 (19%)    |
|                            | 45-54               | 0 (0%)                    | 5 (7%)      | 0 (0%)                    | 6 (9%)      |
|                            | 55+                 | 1 (7%)                    | 5 (7%)      | 0 (0%)                    | 4 (6%)      |
| Gender                     | Female              | 7 (47%)                   | 49 (70%)    | 3 (50%)                   | 54 (78%)    |
|                            | Male                | 8 (53%)                   | 21 (30%)    | 3 (50%)                   | 15 (22%)    |
| NZiDep                     | 0                   | 3 (20%)                   | 15 (21%)    | 0 (0%)                    | 11 (16%)    |
|                            | 1                   | 2 (13%)                   | 14 (20%)    | 1 (17%)                   | 16 (23%)    |
|                            | 2                   | 3 (20%)                   | 12 (17%)    | 2 (33%)                   | 9 (13%)     |
|                            | 3                   | 0 (0%)                    | 10 (14%)    | 0 (0%)                    | 10 (14%)    |
|                            | 4                   | 2 (13%)                   | 7 (10%)     | 1 (17%)                   | 11 (16%)    |
|                            | 5                   | 5 (33%)                   | 12 (17%)    | 2 (33%)                   | 12 (17%)    |
| Education                  | At least secondary  | 15 (100%)                 | 63 (90%)    | 6 (100%)                  | 65 (94%)    |
|                            | No secondary        | 0 (0%)                    | 7 (10%)     | 0 (0%)                    | 4 (6%)      |
| Outcome scores at baseline |                     | mean (sd)                 | mean (sd)   | mean (sd)                 | mean (sd)   |
|                            | K10                 | 28.4 (5.9)                | 29.8 (6.3)  | 32.2 (5.3)                | 27.8 (5.6)  |
|                            | HADS                | 20.2 (7.5)                | 20.7 (5.5)  | 23.0 (3.0)                | 19.2 (5.1)  |
|                            | HADS Anxiety        | 11.9 (4.9)                | 12.2 (3.2)  | 13.2 (2.9)                | 11.7 (3.5)  |
|                            | HADS Depression     | 8.3 (3.2)                 | 8.5 (3.5)   | 9.8 (3.7)                 | 7.5 (3.6)   |
|                            | WSAS                | 21.7 (7.8)                | 23.3 (8.3)  | 23.8 (5.2)                | 19.2 (8.7)  |
|                            | Health Thermometer* | 57.4 (16.5)               | 55.0 (20.6) | 50.5 (17.4)               | 59.5 (18.7) |

\* Health Thermometer: Lower scores indicate poorer health state.

**Supplementary Results Text 1: Mean difference in K10 primary outcome at 6 months, adjusting only for baseline scores.**

The protocol for the primary outcome (K10) analysis only specified that linear mixed model would be adjusted for baseline scores. The results from the primary analysis reported in the main paper were also adjusted for baseline sociodemographic variables (repeated in Supplementary Table R6 below from Table 3).

The analysis of K10 scores at 6 months (adjusted solely for baseline K10 scores) returned a slightly smaller mean difference between groups (poorer mean K10 score in UBI compared to PAU: difference = 1.07, 95% CI -1.67, 3.82).

This supplementary analysis draws on all participants with at least one follow-up observation. All other elements of the statistical model (accounting for clustering by GP and repeat observations for the same participant) are handled as per the main analysis (see Methods of main paper).

Supplementary Table R6. Primary outcome (K10) differences between UBI and PAU study arms at 6 months under different covariate adjustment models.

| Analysis                                                        | Mean difference in K10<br>at 6 months (95% CI) |
|-----------------------------------------------------------------|------------------------------------------------|
| <b>Analysis of all participants with some follow-up (n=139)</b> |                                                |
| Adjusted for baseline covariates *                              | 1.68 (-1.18, 4.55)                             |
| Adjusted for baseline K10 score only**                          | 1.07 (-1.67, 3.82)                             |

\* Result as reported in Table 3 of main paper.

\*\* Analysis in line with specifications in protocol paper.

## Supplementary Methods and Results: Sensitivity analysis to account for participants with no follow-up data.

The following analyses were implemented following initial peer-review, and were not *a priori* components of the analysis plan. Results from analyses are presented in Supplementary Table XX below, following the description of the methods and results. These sensitivity analyses aimed to consider the impact of complete loss-to-follow-up (participants no post-baseline data) on the primary outcome analysis, using two different frameworks assuming data were missing at random (MAR) or missing not at random (MNAR). A discussion of potential impacts of loss-to-follow-up on study results (attrition bias) is available in Bell et al. (2012) and discussion of missing data mechanisms can be read elsewhere (e.g. Bell et al. (2012); Newgard et al. (2015) and Sullivan et al. (2018)).

### References for subsequent section:

Bell ML, Kenward MG, Fairclough DL, Horton NJ. Differential dropout and bias in randomised controlled trials: when it matters and when it may not. *BMJ*. 2013;346:e8668.

Newgard CD, Lewis RJ. Missing Data: How to Best Account for What Is Not Known. *JAMA*. 2015;314:940-1.

Sullivan TR, White IR, Salter AB, Ryan P, Lee KJ. Should multiple imputation be the method of choice for handling missing data in randomized trials? *Stat Methods Med Res*. 2018;27:2610-26.

van Buuren S, Groothuis-Oudshoorn K. mice: Multivariate Imputation by Chained Equations in R. *Journal of Statistical Software*. 2011;45(3):1-67.

### Imputation of outcomes under the Missing at Random (MAR) assumption.

Imputation was implemented using the mice package in R (van Buuren et al., 2011). All primary and secondary outcomes at all follow-up times were included in the imputation model, along with sociodemographic variables at baseline (gender/sex, age group, ethnicity, education, and NZiDep category: see Table 1 of the main paper for details about the specific sub-groups within each of these variables). Imputation was conducted separately for the intervention (UBI) and control (PAU) groups (Sullivan et al., 2018).

A total of 50 imputation datasets were created; each dataset was analysed for the primary outcome following the methods used for the main analysis in the paper (linear mixed model for K10 score at 6 months, adjusted for baseline K10 score and sociodemographic covariates). The estimates from these 50 models were then combined using Rubin's rules to produce the point estimate and 95% confidence interval (which takes into account variability in the effect estimates across all the imputed datasets.)

The intervention effect at 6 months is presented in Supplementary Table R7: under the assumption that the missing data mechanism was MAR (implemented using multiple imputation) there was a mean difference in K10 scores of 1.78 points (95% CI -0.96, 4.51; positive scores indicate better outcomes in the practice as usual [PAU] arm compared to UBI). This was almost identical to the estimates from the linear mixed model reported in Table 3 (repeated in Supplementary Table R7 for reference) which also assumed an MAR mechanism for missing data (conditional on the adjusted baseline variables in that model), but the analysis in the main results only included participants with at least one post-baseline measurement.

### Imputation of outcomes under the Missing Not At Random (MNAR) assumption.

Analysis assuming that outcome values were MNAR was repeated under several conditions to explore the potential impact of different types of missing data mechanisms. These analyses all assumed that participants who did not participate in any follow-up did worse than those who participated in at least one follow-up.

In all scenarios, those who were not lost-to-follow-up (i.e. had at least one follow-up measure) kept either their original K10 scores at 6 months, or their imputed values at 6 months (for those with only partial follow-up: using the same imputed datasets as analysed under the MAR assumption). Imputation under MAR principles was considered reasonable for those with at least one follow-up measurement (but no 6-month measurement), as the follow-up measurements were all timed well after the conclusion of the core interventions delivered as part of the trial.

**In MNAR Scenario 1:** Individuals with no follow-up data were given a K10 score at six months set to 4 points lower than their imputed score.

**In MNAR Scenario 2:** Individuals with no follow-up data were given the same K10 score at six months that they had at baseline. This is effectively a “last observation carried forward” analysis for those with no follow-up data.

**In MNAR Scenario 3:** Individuals with no follow-up data were given a K10 score at six months that was 4 points lower than their baseline score.

The outcome analyses were again repeated on the 50 imputed datasets, and the intervention effect results combined across the resulting estimates.

While the effect sizes were slightly different from the main study result (Supplementary Table R7), these assumptions of data being MNAR had relatively minor impact on effect sizes. The most conservative result was under Scenario 1, assuming outcomes for those with no follow-up data were 4 points worse than imputed, returned a mean difference of 2.03, 95% CI -0.63, 4.70.

Note that the confidence intervals with the MNAR sensitivity analyses are likely to be conservative (i.e. not as wide as they should be) because the differences applied from the imputed or baseline values in each scenario were fixed rather than stochastic quantities (i.e. assumes that the applied difference from the imputed or baseline score was always a fixed quantity for all people).

Supplementary Table R7. Estimates of primary outcome (K10) effect size at 6 months under different assumptions of missing outcome profiles in participants with no follow-up data.

| Analysis                                                        | Mean difference in K10 at 6 months (95% CI) |
|-----------------------------------------------------------------|---------------------------------------------|
| <b>Analysis of all participants with some follow-up (n=139)</b> |                                             |
| Adjusted for baseline covariates (main analysis*)               | 1.68 (-1.18, 4.55)                          |
| <b>Analysis including all randomised participants (n=160)</b>   |                                             |
| Imputed K10 outcome at 6 months (MAR assumption*)               | 1.78 (-0.96, 4.51)                          |
| Imputed K10 outcome at 6 months (MNAR assumptions*)             |                                             |
| 1. K10 at 6m set to 4 points worse than imputed                 | 2.03 (-0.63, 4.70)                          |
| 2. K10 at 6m set to baseline score                              | 1.45 (-0.95, 3.84)                          |
| 3. K10 at 6m set to 4 point worse than baseline                 | 1.71 (-0.95, 4.37)                          |

\* Result as reported in Table 3 of main body of paper.

\* MAR (missing at random) and MNAR (missing not at random) assumptions are for the 21 participants lost to follow up (no post-baseline data).

**Table 1: CONSORT 2010 checklist of information to include when reporting a cluster randomised trial**

| Section/Topic                    | Item No | Standard Checklist item                                                                                                                | Extension for cluster designs                                                                | Page No *                                |
|----------------------------------|---------|----------------------------------------------------------------------------------------------------------------------------------------|----------------------------------------------------------------------------------------------|------------------------------------------|
| <b>Title and abstract</b>        |         |                                                                                                                                        |                                                                                              |                                          |
|                                  | 1a      | Identification as a randomised trial in the title                                                                                      | Identification as a cluster randomised trial in the title                                    | Title page                               |
|                                  | 1b      | Structured summary of trial design, methods, results, and conclusions (for specific guidance see CONSORT for abstracts) <sup>1,2</sup> | See table 2                                                                                  | In abstract                              |
| <b>Introduction</b>              |         |                                                                                                                                        |                                                                                              |                                          |
| <b>Background and objectives</b> | 2a      | Scientific background and explanation of rationale                                                                                     | Rationale for using a cluster design                                                         | p. 4-5<br>also p. 6 (methods)            |
|                                  | 2b      | Specific objectives or hypotheses                                                                                                      | Whether objectives pertain to the cluster level, the individual participant level or both    | p. 4                                     |
| <b>Methods</b>                   |         |                                                                                                                                        |                                                                                              |                                          |
| <b>Trial design</b>              | 3a      | Description of trial design (such as parallel, factorial) including allocation ratio                                                   | Definition of cluster and description of how the design features apply to the clusters       | p. 4-5                                   |
|                                  | 3b      | Important changes to methods after trial commencement (such as eligibility criteria), with reasons                                     |                                                                                              | n/a                                      |
| <b>Participants</b>              | 4a      | Eligibility criteria for participants                                                                                                  | Eligibility criteria for clusters                                                            | p.4 (for both clusters and participants) |
|                                  | 4b      | Settings and locations where the data were collected                                                                                   |                                                                                              | p. 4                                     |
| <b>Interventions</b>             | 5       | The interventions for each group with sufficient details to allow replication, including how and when they were actually administered  | Whether interventions pertain to the cluster level, the individual participant level or both | p. 7                                     |
| <b>Outcomes</b>                  | 6a      | Completely defined pre-                                                                                                                | Whether outcome measures                                                                     | p. 8                                     |



|                                         |     |                                                                                                                                                                                             |                                                                                                                                                                                                                         |                                               |
|-----------------------------------------|-----|---------------------------------------------------------------------------------------------------------------------------------------------------------------------------------------------|-------------------------------------------------------------------------------------------------------------------------------------------------------------------------------------------------------------------------|-----------------------------------------------|
|                                         |     | specified primary and secondary outcome measures, including how and when they were assessed                                                                                                 | pertain to the cluster level, the individual participant level or both                                                                                                                                                  |                                               |
|                                         | 6b  | Any changes to trial outcomes after the trial commenced, with reasons                                                                                                                       |                                                                                                                                                                                                                         | n/a                                           |
| <b>Sample size</b>                      | 7a  | How sample size was determined                                                                                                                                                              | Method of calculation, number of clusters(s) (and whether equal or unequal cluster sizes are assumed), cluster size, a coefficient of intracluster correlation (ICC or <i>k</i> ), and an indication of its uncertainty | p. 8-9                                        |
|                                         | 7b  | When applicable, explanation of any interim analyses and stopping guidelines                                                                                                                |                                                                                                                                                                                                                         | n/a (no interim analysis was applied)         |
| <b>Randomisation:</b>                   |     |                                                                                                                                                                                             |                                                                                                                                                                                                                         |                                               |
| <b>Sequence generation</b>              | 8a  | Method used to generate the random allocation sequence                                                                                                                                      |                                                                                                                                                                                                                         | p. 6                                          |
|                                         | 8b  | Type of randomisation; details of any restriction (such as blocking and block size)                                                                                                         | Details of stratification or matching if used                                                                                                                                                                           | p. 6                                          |
| <b>Allocation concealment mechanism</b> | 9   | Mechanism used to implement the random allocation sequence (such as sequentially numbered containers), describing any steps taken to conceal the sequence until interventions were assigned | Specification that allocation was based on clusters rather than individuals and whether allocation concealment (if any) was at the cluster level, the individual participant level or both                              | n/a                                           |
| <b>Implementation</b>                   | 10  | Who generated the random allocation sequence, who enrolled participants, and who assigned participants to interventions                                                                     | Replace by 10a, 10b and 10c                                                                                                                                                                                             |                                               |
|                                         | 10a |                                                                                                                                                                                             | Who generated the random allocation sequence, who enrolled clusters, and who assigned clusters to interventions                                                                                                         | p. 6 (Recruitment and Randomisation sections) |

|                            |     |                                                                                                                                                |                                                                                                                                                                     |                                                                                                                                     |
|----------------------------|-----|------------------------------------------------------------------------------------------------------------------------------------------------|---------------------------------------------------------------------------------------------------------------------------------------------------------------------|-------------------------------------------------------------------------------------------------------------------------------------|
|                            | 10b |                                                                                                                                                | Mechanism by which individual participants were included in clusters for the purposes of the trial (such as complete enumeration, random sampling)                  | p. 7 (Recruitment procedures subsection)                                                                                            |
|                            | 10c |                                                                                                                                                | From whom consent was sought (representatives of the cluster, or individual cluster members, or both), and whether consent was sought before or after randomisation | p. 6 (for GPs as the clusters) and p.7 (consent for the patients)                                                                   |
| <b>Blinding</b>            |     |                                                                                                                                                |                                                                                                                                                                     |                                                                                                                                     |
|                            | 11a | If done, who was blinded after assignment to interventions (for example, participants, care providers, those assessing outcomes) and how       |                                                                                                                                                                     | GPs unable to be blinded (p 6)<br><br>Statistician blinded during analysis (p. 9)<br><br>Research assistant unable to be blinded    |
|                            | 11b | If relevant, description of the similarity of interventions                                                                                    |                                                                                                                                                                     | n/a                                                                                                                                 |
| <b>Statistical methods</b> |     |                                                                                                                                                |                                                                                                                                                                     |                                                                                                                                     |
|                            | 12a | Statistical methods used to compare groups for primary and secondary outcomes                                                                  | How clustering was taken into account                                                                                                                               | p.9-10<br><br>Analysis and clustering noted on p. 9                                                                                 |
|                            | 12b | Methods for additional analyses, such as subgroup analyses and adjusted analyses                                                               |                                                                                                                                                                     | p. 10                                                                                                                               |
| <b>Results</b>             |     |                                                                                                                                                |                                                                                                                                                                     |                                                                                                                                     |
|                            | 13a | For each group, the numbers of participants who were randomly assigned, received intended treatment, and were analysed for the primary outcome | For each group, the numbers of clusters that were randomly assigned, received intended treatment, and were analysed for the primary outcome                         | Clusters (GPs) noted on p. 11, additional detail in Supplementary Table R1.<br><br>Individual patients noted on p. 11, flowchart in |

|                                |     |                                                                                                                                         |                                                                                                                            |                                                                                                                                                                                                |
|--------------------------------|-----|-----------------------------------------------------------------------------------------------------------------------------------------|----------------------------------------------------------------------------------------------------------------------------|------------------------------------------------------------------------------------------------------------------------------------------------------------------------------------------------|
|                                |     |                                                                                                                                         |                                                                                                                            | Figure 1 (including who was covered in analysis)                                                                                                                                               |
|                                | 13b | For each group, losses and exclusions after randomisation, together with reasons                                                        | For each group, losses and exclusions for both clusters and individual cluster members                                     | Clusters (GPs) covered on p.11 (no losses or exclusions, other than zero-recruitment which is covered in Supplementary Table R1)<br><br>Patients covered in Figure 1                           |
| <b>Recruitment</b>             | 14a | Dates defining the periods of recruitment and follow-up                                                                                 |                                                                                                                            | p. 5                                                                                                                                                                                           |
|                                | 14b | Why the trial ended or was stopped                                                                                                      |                                                                                                                            | p. 5                                                                                                                                                                                           |
| <b>Baseline data</b>           | 15  | A table showing baseline demographic and clinical characteristics for each group                                                        | Baseline characteristics for the individual and cluster levels as applicable for each group                                | Individual level characteristics reported in Table 1.                                                                                                                                          |
| <b>Numbers analysed</b>        | 16  | For each group, number of participants (denominator) included in each analysis and whether the analysis was by original assigned groups | For each group, number of clusters included in each analysis                                                               | Analysis by original assigned groups (methods, p. 9)<br><br>Number of participants for each analysis: Table 2, Table 3<br><br>Number of clusters (across all analyses): Supplementary Table R1 |
| <b>Outcomes and estimation</b> | 17a | For each primary and secondary outcome, results for each group, and the estimated effect size and its precision (such as 95%            | Results at the individual or cluster level as applicable and a coefficient of intracluster correlation (ICC or k) for each | Effect size and precision given in all tables and figures, and for outcomes                                                                                                                    |

|                           |     |                                                                                                                                           |                                                                           |                                                                                                              |
|---------------------------|-----|-------------------------------------------------------------------------------------------------------------------------------------------|---------------------------------------------------------------------------|--------------------------------------------------------------------------------------------------------------|
|                           |     | confidence interval)                                                                                                                      | primary outcome                                                           | reported in body of text                                                                                     |
|                           |     |                                                                                                                                           |                                                                           | ICC reported on p 17 for primary outcomes, and Supplementary Table R4 for all outcomes.                      |
|                           | 17b | For binary outcomes, presentation of both absolute and relative effect sizes is recommended                                               |                                                                           | n/a (no binary outcomes used in study)                                                                       |
| <b>Ancillary analyses</b> | 18  | Results of any other analyses performed, including subgroup analyses and adjusted analyses, distinguishing pre-specified from exploratory |                                                                           | ICCs reported on page 17 (as noted above)<br><br>Information on additional treatment received presented p 17 |
| <b>Harms</b>              | 19  | All important harms or unintended effects in each group (for specific guidance see CONSORT for harms <sup>3</sup> )                       |                                                                           | n/a                                                                                                          |
| <b>Discussion</b>         |     |                                                                                                                                           |                                                                           |                                                                                                              |
| <b>Limitations</b>        | 20  | Trial limitations, addressing sources of potential bias, imprecision, and, if relevant, multiplicity of analyses                          |                                                                           | P 18-19 (recruitment not completed to planned sample size)<br><br>p 20-21 (other limitations)                |
| <b>Generalisability</b>   | 21  | Generalisability (external validity, applicability) of the trial findings                                                                 | Generalisability to clusters and/or individual participants (as relevant) | p. 20-21                                                                                                     |
| <b>Interpretation</b>     | 22  | Interpretation consistent with results, balancing benefits and harms, and considering other relevant evidence                             |                                                                           | (across discussion)                                                                                          |
| <b>Other information</b>  |     |                                                                                                                                           |                                                                           |                                                                                                              |

|                     |    |                                                                                 |                                 |
|---------------------|----|---------------------------------------------------------------------------------|---------------------------------|
| <b>Registration</b> | 23 | Registration number and name of trial registry                                  | p.4                             |
| <b>Protocol</b>     | 24 | Where the full trial protocol can be accessed, if available                     | p. 4, reference list for detail |
| <b>Funding</b>      | 25 | Sources of funding and other support (such as supply of drugs), role of funders | p. 22-23                        |

\* Note: page numbers optional depending on journal requirements

For peer review only

**Table 2: Extension of CONSORT for abstracts<sup>1,2</sup> to reports of cluster randomised trials**

| Item                      | Standard Checklist item                                                                                     | Extension for cluster trials                                                                                   |
|---------------------------|-------------------------------------------------------------------------------------------------------------|----------------------------------------------------------------------------------------------------------------|
| <b>Title</b>              | Identification of study as randomised                                                                       | <b>Identification of study as cluster randomised</b>                                                           |
| <b>Trial design</b>       | Description of the trial design (e.g. parallel, cluster, non-inferiority)                                   |                                                                                                                |
| <b>Methods</b>            |                                                                                                             |                                                                                                                |
| <b>Participants</b>       | Eligibility criteria for participants and the settings where the data were collected                        | <b>Eligibility criteria for clusters</b>                                                                       |
| <b>Interventions</b>      | Interventions intended for each group                                                                       |                                                                                                                |
| <b>Objective</b>          | Specific objective or hypothesis                                                                            | <b>Whether objective or hypothesis pertains to the cluster level, the individual participant level or both</b> |
| <b>Outcome</b>            | Clearly defined primary outcome for this report                                                             | <b>Whether the primary outcome pertains to the cluster level, the individual participant level or both</b>     |
| <b>Randomization</b>      | How participants were allocated to interventions                                                            | <b>How clusters were allocated to interventions</b>                                                            |
| <b>Blinding (masking)</b> | Whether or not participants, care givers, and those assessing the outcomes were blinded to group assignment |                                                                                                                |
| <b>Results</b>            |                                                                                                             |                                                                                                                |
| <b>Numbers randomized</b> | Number of participants randomized to each group                                                             | <b>Number of clusters randomized to each group</b>                                                             |
| Recruitment               | Trial status <sup>1</sup>                                                                                   |                                                                                                                |
| <b>Numbers analysed</b>   | Number of participants analysed in each group                                                               | <b>Number of clusters analysed in each group</b>                                                               |
| <b>Outcome</b>            | For the primary outcome, a result for each group and the estimated effect size and its precision            | <b>Results at the cluster or individual participant level as applicable for each primary outcome</b>           |
| <b>Harms</b>              | Important adverse events or side effects                                                                    |                                                                                                                |
| <b>Conclusions</b>        | General interpretation of the results                                                                       |                                                                                                                |
| <b>Trial registration</b> | Registration number and name of trial register                                                              |                                                                                                                |
| <b>Funding</b>            | Source of funding                                                                                           |                                                                                                                |

<sup>1</sup> Relevant to Conference Abstracts

## REFERENCES

- 1 Hopewell S, Clarke M, Moher D, Wager E, Middleton P, Altman DG, et al. CONSORT for reporting randomised trials in journal and conference abstracts. *Lancet* 2008, 371:281-283
- 2 Hopewell S, Clarke M, Moher D, Wager E, Middleton P, Altman DG at al (2008) CONSORT for reporting randomized controlled trials in journal and conference abstracts: explanation and elaboration. *PLoS Med* 5(1): e20
- 3 Ioannidis JP, Evans SJ, Gotzsche PC, O'Neill RT, Altman DG, Schulz K, Moher D. Better reporting of harms in randomized trials: an extension of the CONSORT statement. *Ann Intern Med* 2004; 141(10):781-788.

# BMJ Open

## A cluster randomised controlled trial of a guided self-help mental health intervention in primary care

|                                 |                                                                                                                                                                                                                                                                                                                                                                                                                                                                    |
|---------------------------------|--------------------------------------------------------------------------------------------------------------------------------------------------------------------------------------------------------------------------------------------------------------------------------------------------------------------------------------------------------------------------------------------------------------------------------------------------------------------|
| Journal:                        | <i>BMJ Open</i>                                                                                                                                                                                                                                                                                                                                                                                                                                                    |
| Manuscript ID                   | bmjopen-2018-023481.R2                                                                                                                                                                                                                                                                                                                                                                                                                                             |
| Article Type:                   | Research                                                                                                                                                                                                                                                                                                                                                                                                                                                           |
| Date Submitted by the Author:   | 16-Jan-2019                                                                                                                                                                                                                                                                                                                                                                                                                                                        |
| Complete List of Authors:       | Mathieson, Fiona; University of Otago – Wellington, Department of Psychological Medicine<br>Stanley, James; University of Otago, Wellington, Public Health; University of Otago, Wellington<br>Collings, Catherine (Sunny) ; University of Otago Wellington, Deans Department<br>Tester, Rachel; University of Otago, Wellington, Primary Health Care and General Practice<br>Dowell, Anthony; Wellington School of Medicine and Health Sciences, General Practice |
| <b>Primary Subject Heading</b>: | Mental health                                                                                                                                                                                                                                                                                                                                                                                                                                                      |
| Secondary Subject Heading:      | General practice / Family practice, Mental health                                                                                                                                                                                                                                                                                                                                                                                                                  |
| Keywords:                       | MENTAL HEALTH, PRIMARY CARE, BRIEF INTERVENTIONS                                                                                                                                                                                                                                                                                                                                                                                                                   |
|                                 |                                                                                                                                                                                                                                                                                                                                                                                                                                                                    |

SCHOLARONE™  
Manuscripts



1  
2  
3 1  
4  
5 2 **A cluster randomised controlled trial of a guided self-help mental health intervention in**  
6 **primary care**  
7 3  
8

9 4 Fiona Mathieson<sup>1</sup>

10 5 Email: [fiona.mathieson@otago.ac.nz](mailto:fiona.mathieson@otago.ac.nz)

11 6 James Stanley<sup>2</sup>

12 7 Email: [james.stanley@otago.ac.nz](mailto:james.stanley@otago.ac.nz)

13 8 Sunny Collings<sup>3</sup>

14 9 Email: [deanseauow@otago.ac.nz](mailto:deanseauow@otago.ac.nz)

15 10 Rachel Tester<sup>4</sup>

16 11 Email: [rachel.testler@otago.ac.nz](mailto:rachel.testler@otago.ac.nz)

17 12 Anthony Dowell<sup>4</sup>

18 13 Email: [tony.dowell@otago.ac.nz](mailto:tony.dowell@otago.ac.nz)

19 14  
20 15 \* Corresponding author: [fiona.mathieson@otago.ac.nz](mailto:fiona.mathieson@otago.ac.nz) Ph. 64 4 9186034, Fax 64 4 3855877

21 16 <sup>1</sup>Department of Psychological Medicine, University of Otago, PO Box 7343, Wellington  
22 17 South 6242, New Zealand

23 18 <sup>2</sup>Biostatistical Group, Dean's Department, University of Otago, PO Box 7343, Wellington  
24 19 South 6242, New Zealand

25 20 <sup>3</sup>Office of the Dean and Head of Campus Te Tari Manutaki,  
26 21 Department of Psychological Medicine, University of Otago, PO Box 7343, Wellington  
27 22 South 6242, New Zealand

28 23 <sup>4</sup>Department of Primary Health Care and General Practice, University of Otago, PO Box  
29 24 7343, Wellington South 6242, New Zealand

30 25  
31 26 Word Count: 5801

32 27  
33 28 **Abstract**

34 29 **Objectives:** To ascertain whether an ultra-brief intervention improves mental health  
35 30 outcomes for patients in general practice with mild-to-moderate mental health concerns.

36 31 **Trial design:** Two-arm cluster randomised controlled trial.

37 32 **Methods:**

38 33 **Participants:** General practitioners (GPs) were invited based on working in a participating  
39 34 general practice. Patients were eligible to participate if aged 18-65, scored  $\leq 35$  on the  
40 35 Kessler-10 (K10) and if meeting local mental health access criteria (based on age, low  
41 36 income, or ethnic group).

42 37 **Interventions:** Intervention arm GPs were trained on the ultra-brief intervention (UBI)  
43 38 approach, with participating patients receiving three structured appointments over five weeks.

39 GPs randomised to Practice as Usual (PAU) did not receive training, and delivered support  
40 following their existing practice approaches.

41 **Outcome Measures:** Primary outcome was patient-level K10 score at 6 months post-  
42 recruitment.

43 **Randomisation:** GP practices were randomised to UBI training or PAU at the start of the  
44 study.

45 **Blinding:** GPs were not blinded to group assignment.

#### 46 **Results:**

47 **Numbers randomised:** 62 GPs (recruiting 85 patients) were randomised to UBI, and 50 to  
48 PAU (recruiting 75 patients).

49 **Numbers analysed:** 31 GPs recruited at least one patient in the UBI arm (70 patients  
50 analysed), and 21 GPs recruited at least one patient in the PAU arm (69 patients analysed).

51 **Outcome:** K10 scores from an intention-to-treat analysis were similar in UBI and PAU  
52 arms, with a wide confidence interval (mean adjusted K10 difference = 1.68 points higher in  
53 UBI arm, 95% CI -1.18, 4.55; p=0.255). Secondary outcomes were also similar in the two  
54 groups.

55 **Conclusions:** The UBI intervention did not lead to better outcomes than practice as usual,  
56 though the study had lower than planned power due to poor recruitment. The study results  
57 can still contribute to the continuing debate about brief psychological therapy options for  
58 primary care and their development.

59 **Trial registration:** Australia New Zealand Clinical Trials Registry ACTRN12613000041752

60 **Funding:** Compass Health, Oakley Mental Health Research Foundation, Wellington Medical  
61 Research Foundation, University of Otago Research Fund

#### 62 63 64 **Strengths and limitations**

- 65 • Pragmatic effectiveness trial of a mental health intervention in primary care.
- 66 • Intervention included Maori cultural adaptations.
- 67 • Recruitment issues limit strength of results.
- 68 • Intervention was applied to more severe mental health presentations that it was  
69 developed for.
- 70 • GP degree of adherence to the intervention tool is unclear.

1  
2  
3 71  
45 72 **Keywords**6  
7  
8 73 Mental Health, Primary Care  
910 74 **Introduction**11  
12  
13 75 Mental health is major aspect of health and poor mental health is highly prevalent in the  
14 76 general community. Consistent with international findings, just under 40% of the New  
15 77 Zealand (NZ) population had met criteria for a diagnosable mental disorder during their life,  
16 78 and roughly a fifth had experienced a mental disorder in the previous year [1].  
17  
18  
1920  
21 79 There is also considerable international concern about the healthcare burden arising from  
22 80 mental health problems and substance abuse [2-4]), with the World Mental Health Survey (of  
23 81 21 countries) suggesting that only 41% of people with depression received treatment that met  
24 82 even minimal standards [5].  
25  
26  
2728  
29 83 In NZ, as in other OECD countries, mental health problems are common presentations in  
30 84 primary care. Around one-quarter of primary care patients (26.5% and 29.8% of men and  
31 85 women, respectively), attending their general practice in NZ met criteria for a mild-moderate  
32 86 mental health disorder and an estimated 50-70% of mental health concerns are managed  
33 87 exclusively at the primary care level, since secondary care services have become more  
34 88 targeted towards severe and enduring mental illness in recent years [6].  
35  
36  
37  
3839  
40 89 Internationally there is a call for psychological therapies to be more widely available in  
41 90 primary care [7], and growing unease about increasing levels of antidepressant medications  
42 91 being prescribed compared with the limited resources available for psychological  
43 92 interventions [8]. However, treatment options at the primary care level are limited, with GPs  
44 93 expressing concerns about gaps in services for patients with mild-moderate mental health  
45 94 presentations and a desire to offer a brief intervention themselves [9]. In NZ, GPs reported  
46 95 that as few as 22% of patients with mild-moderate mental health syndromes receive any  
47 96 formal help [10].  
48  
49  
50  
51  
52  
5354 97 Such patient presentations often comprise sub-threshold syndromes [11, 12], and cases of  
55 98 mild-moderate common mental disorder. These are combinations of problems such as  
56 99 anxiety, depression, substance use and interpersonal problems that do not meet the threshold  
57  
58  
59 100 for disorder in standard diagnostic systems such as DSM-5. Often these arise in the context of

1  
2  
3 101 social problems or family or economic stress. In NZ, 36% of general practice attendees report  
4 102 anxiety, depression or substance-use, or a combination of these issues [6]. Such presentations  
5 103 can be associated with significant impairment in functioning and suffering [13, 14], with  
6 104 some going on to develop severe depression [15, 16]. Intervention may be warranted for up to  
7 105 80% of those affected [10, 13], but referral out of the practice can be problematic due to  
8 106 referral eligibility criteria, waiting times, administrative issues and cost [9, 17, 18].

9  
10  
11  
12  
13  
14 107 Increasing knowledge of the burden of mild-moderate disorder led to the development of a  
15 108 platform of Primary Mental Health Initiatives in NZ, which included some increase in access  
16 109 to psychological therapies and extended consultations with GPs. The inclusion criteria for  
17 110 these initiatives, however, mean that only up to 15% of the population can gain access to  
18 111 those services [9].

19  
20  
21  
22  
23  
24 112 This service-gap led us to develop a GP delivered ultra-brief intervention (UBI), with  
25 113 development and refinement based on service user feedback [19]. This model has the  
26 114 advantages of avoiding the need for referral on to an expensive professional, such as a  
27 115 psychologist, of being easily accessible to patients, and of potentially building on existing  
28 116 trusted relationships. This fits with the movement towards alternative methods of service  
29 117 delivery for mild to moderate mental health presentations, often termed ‘low intensity’  
30 118 interventions. These interventions often include guided self-help, bibliotherapy and  
31 119 computerised delivery of care, with current evidence suggesting that even minimal therapist  
32 120 contact leads to better outcomes than self-help alone [20-23].

33  
34  
35  
36  
37  
38  
39  
40 121 UBI was feasibility tested with a group of 16 patients and then adapted for Maori (the  
41 122 indigenous people of New Zealand) and feasibility tested with a group of 9 patients [24, 25].  
42 123 Based on questionnaire feedback, clinician and patient satisfaction ratings for both feasibility  
43 124 studies were very positive in terms of relevance and acceptability. The psychological well-  
44 125 being of the patients, as measured by the Kessler-10 (K10) [26], was also significantly  
45 126 improved post-intervention (at 3 month follow-up) for both Maori and non-Maori, although  
46 127 there was no control group [24, 25]. Based on these initial findings we designed a cluster  
47 128 randomized controlled trial to measure the effectiveness of UBI.

48  
49  
50  
51  
52  
53  
54  
55 129 The aims of the study were to compare patient-level outcomes on (1) mental health state (as  
56 130 measured by K10 scores) at 6 months between UBI and practice as usual (PAU) study arms  
57 131 (primary outcome) and (2) levels of distress (depression and anxiety) and functioning (work,  
58  
59  
60

1  
2  
3 132 social and relationship) at 8 weeks and 3 months between UBI and PAU study arms (as  
4 133 secondary outcomes).

## 134 **Methods**

135 A protocol for this study has been previously published, and includes description of planned  
136 analyses [27]. The trial was registered prior to recruitment commencing with the Australia  
137 New Zealand Clinical Trials Registry (registration ACTRN12613000041752.)

### 138 **Design**

139 We used a pragmatic two-arm single blinded, cluster randomised controlled trial of UBI  
140 compared with PAU, in a primary care setting. GPs were randomised by practice to  
141 exclusively deliver either UBI or PAU to all their recruited patients. GPs were treated as the  
142 clusters in the study design (while there was clustering by practice, the GPs were treated as  
143 the unit of analysis as practitioner attributes were anticipated to be a higher source of  
144 variability in outcomes.) Analysis followed an intention-to-treat approach.

### 145 **Setting**

146 The study was conducted in general practices in the greater Wellington region, New Zealand.  
147 This included practices in both city and semi-rural settings, serving populations from a wide  
148 range of socio-economic backgrounds. Recruitment took place between 1/5/2013 and  
149 1/7/2016. The trial ended prior to achieving the final sample size when funding for data  
150 collection was exhausted.

151

152

153

154

155

### 156 **Participants**

157 This was a pragmatic trial supported within existing treatment services. GPs were eligible to  
158 participate if they were currently working in a practice that was part of the Compass Health  
159 Primary Health Organisation (PHO) which covers the greater Wellington region.

160

161 Patients were eligible if aged between 18 and 65 and identified by their GP in a routine  
162 appointment as experiencing stress or distress. Patients were required to score 35 or less on

1  
2  
3 163 the Kessler Psychological Distress Scale (K10) [26, 28] during their initial GP consultation,  
4  
5 164 with no lower cut-off on this score. The present study followed previous study protocols [24,  
6  
7 165 25] by including scores between 30 and 35 on the K10 as indicative of mild to moderate  
8  
9 166 levels of psychological distress rather than major psychiatric disorder. Individuals taking anti-  
10  
11 167 depressant or other psychiatric medications were eligible to participate in the study.

12 168  
13  
14 169 Patients were excluded if they lacked fluency in English (as the intervention is an English-  
15  
16 170 language based ‘talking therapy’); had significant levels of cognitive impairment as  
17  
18 171 determined by the GP; or had reported recent or acute suicidal ideation (i.e., within the  
19  
20 172 previous 2 weeks). Chronic low level suicidality did not exclude an individual from  
21  
22 173 participating. However, GPs were informed of patients who had high scores or suicidality at  
23  
24 174 screening, or for whom referral to appropriate (secondary) mental health services by GPs was  
25  
26 175 indicated, and these patients were not eligible to participate further in the study.

27 176 Inclusion criteria were based on the access criteria of a local partner primary health  
28  
29 177 organisation (PHO) to psychological therapies. These criteria were youth (defined as 18-24  
30  
31 178 years old), or individuals aged 25 years or older with low income, or Māori or Pacific Island  
32  
33 179 heritage.

### 34 180 **Recruitment of practices and GPs**

35  
36 181 Initial recruitment of practices was supported by the partner PHO. GPs were identified using  
37  
38 182 primary health organisation and practice lists. All of the practices contracted under the  
39  
40 183 partner PHO were contacted (N=52) and invited to participate in the study, and an effort was  
41  
42 184 made to contact all of the GPs within these practices by email, telephone or in person. A total  
43  
44 185 of 23 practices initially consented to participate in the study and a further 18 were recruited  
45  
46 186 during the course of the study. Two practices merged and three withdrew (in each case the  
47  
48 187 single participating GP left the practice) leaving a total of 37 practices involved in the study.

### 49 189 **Randomisation of practices to study arms**

50  
51 190  
52  
53 191 Consenting practices were randomised to provide either UBI or PAU to eligible patients.  
54  
55 192 Randomisation was conducted at the practice level to reduce the risk of contamination if GPs  
56  
57 193 from the same practice were assigned to opposite study arms. To ensure approximately equal  
58  
59 194 numbers of GPs per study arm, randomisation of practices was conducted within five strata,  
60  
195 according to the number of participating GPs (one/two/three/four/more than four). An

1  
2  
3 196 additional two practices dedicated to youth health that were not part of the partner PHO were  
4  
5 197 included and randomised into each arm of the study (i.e. these two practices formed their own  
6  
7 198 stratum). Practices were entered into the trial following consent from individual participating  
8  
9 199 GPs in that practice. Randomisation of all consenting practices was conducted following this  
10  
11 200 step by the project biostatistician (JS) using a computer-based randomisation following the  
12  
13 201 above stratification profile.

14 202

15 203 GPs randomised to the UBI study arm completed a single two-hour training session (as  
16  
17 204 previously described [25]). Due to the training nature of the intervention, it was not possible  
18  
19 205 to blind GPs as to their study arm allocation.

20  
21 206

### 22 23 207 **Recruitment procedures**

24  
25 208 GPs identified patients with common mental health problems who might fulfil study criteria  
26  
27 209 during routine appointments. These patients were screened by the GP for eligibility (using the  
28  
29 210 K10), and referred to the study team. A research assistant then contacted potential  
30  
31 211 participating patients, met with them in person where possible to explain the study, confirm  
32  
33 212 eligibility, obtain consent to participate, and collect pre-treatment (baseline) data. Measures  
34  
35 213 were then collected by mail or email at post-treatment (8 weeks, 3 months and 6 months).  
36  
37 214 Patients received compensation (NZ \$30 [US\$21] vouchers, and entry into a draw for an  
38  
39 215 iPad) following the completion of the final questionnaire, to recompense for time and effort  
40  
41 216 in participating in the study.

42  
43 217

### 44 45 218 **Intervention**

46  
47 219 UBI is a low intensity self-management programme which can be delivered by a GP after a  
48  
49 220 single two-hour training session using a treatment manual based on structured problem  
50  
51 221 solving, motivational interviewing and cognitive behaviour therapy (supported with self-help  
52  
53 222 booklets on relationships, bodily stress, breaking habits and stress management).

54  
55 223 Patients who consented and completed the intake data collection (K10 and baseline  
56  
57 224 measurements) received the GP-led intervention in three short, structured face-to-face  
58  
59 225 sessions (one 30 and two 15 minute sessions) over a five to six week period. Relevant  
60  
226 booklets were provided to the patient after the first session, to be used in the following  
227  
228 session. In New Zealand a stepped care approach to management guides the practitioner



1  
2  
3 228 towards using the most appropriate therapy option for the severity of presentation. UBI was  
4  
5 229 designed for mild to moderate presentations and in training GPs were comfortable with the  
6  
7 230 use of the UBI approach for first line management. The study protocol allowed for patients in  
8  
9 231 either study arm to alter their treatment as needed (e.g. access other talking therapies, or  
10  
11 232 commence mental health medications). Patients were blinded as to their study allocation in  
12  
13 233 that patients in PAU practices were not informed that the UBI was offered in practices  
14  
15 234 randomised to deliver UBI. They were simply told that the study was looking at the  
16  
17 235 effectiveness of PAU [27].

### 236 **Practice as usual**

237 Patients in the PAU study arm received GP support delivered according to their practice as  
238  
239 usual (and available existing services). PAU typically consists of supportive counselling in a  
240  
241 15 minute face-to-face consultation, the provision of psychotropic medication, referral to  
242  
243 psychological or other counselling options, or referral to relevant community services.

### 242 **Patient characteristics**

243  
244 Patients are described on the basis of age, gender, prioritised ethnicity and NZiDep, a NZ-  
245  
246 developed index [29] of individual-level socioeconomic deprivation.  
247  
248 GPs in practices assigned to the PAU study arm received optional training in the intervention  
249  
250 at the end of the study.

### 251 **Patient and Public Involvement**

252 This study had input from an academic mental health consumer (i.e. an academic who is also  
253  
254 a mental health service user and who conducts research from a service user perspective) as  
255  
256 part of the research team at the feasibility stage, and designed the intervention based on  
257  
258 feedback from a focus group process with potential patient users of the mental health  
259  
260 intervention which asked what characteristics such an intervention would need to have. This  
collaborative process is fully described in [19]. This RCT did not have academic consumer or  
patient involvement in the recruitment to and conduct of the study and the burden of the  
intervention was not assessed by the patients. Results of this study will be disseminated by  
email to GP participants who indicated they wanted them on the consent form.



261

## 262 **Outcome measures**

263 The primary outcome measure was the K10 scale [26, 28] score at 6 months (adjusted for  
264 score at baseline: see analysis). The K10 is widely used as a clinical outcome measure in  
265 Primary Care and General Practice in NZ [9]. A 6 month follow up period was chosen to  
266 obtain a sufficient period of assessment following the end of the intervention while at the  
267 same time balancing out challenges in patient cohort retention. All analyses were conducted  
268 to look at patient-level outcomes.

269

270 Secondary outcomes were:

- 271 1) Hospital Anxiety and Depression Scale (HADS), which measures the severity of  
272 depressive and anxiety symptoms in outpatient hospital settings [30]. Reductions in  
273 HADS score indicate reduced anxiety and depression.
- 274 2) Comparison of K10 scores by treatment group at 8 weeks and 12 weeks, adjusted for  
275 baseline scores (to capture short and medium term effectiveness).
- 276 3) Work and Social Adjustment Scale [31], a measure of work, social and relationship  
277 functioning) administered at baseline, 8, 12 and 26 weeks.

278 Outcomes were measured at the same time points in both UBI and PAU groups (baseline, and  
279 at 8, 12, and 26 weeks following baseline)

280

## 281 **Statistical methods**

### 282 **Sample size and Power analysis**

283 Sample size for the cluster randomised trial was calculated using a simulation method, using  
284 standard deviations of patient outcomes from the UBI feasibility study (standard deviation of  
285 post-treatment scores = 7.5 [25]). To detect a difference in K10 improvement scores of 6  
286 points in the UBI arm compared with 2 points in the control arm (at 80% power and alpha =  
287 0.05) would require 15 GPs per arm recruiting eight completing patients each on average  
288 (n=240 total with complete data). Adjusting for loss to follow-up of 20% gave a recruitment  
289 target of ten patients per GP. The simulation settings roughly correspond to an intraclass  
290 correlation (ICC) of 0.15 for considering clustering of patient scores by GP (equivalent to the  
291 ICC from the feasibility study [25]). Power analysis for the secondary HADS outcome  
292 indicated 80% power to detect a difference of 3.2 points between groups (based on a standard

1  
2  
3 293 deviation of approximately 6 [32]) assuming a similar ICC for the HADS scale as for the K10  
4  
5 294 measure (empirical data were not available).  
6  
7 295

### 9 296 **Data Analysis**

10 297  
11  
12 298 The statistician was blinded to the intervention or control status of participants (both practices  
13  
14 299 and patients) during conduct of the study and analysis. Results were unblinded once analysis  
15  
16 300 was complete. Data processing and analysis were conducted in R 3.2.3 (R Institute, Vienna)  
17  
18 301 with linear mixed models fit using the lmer package [33] and imputation conducted using the  
19  
20 302 mice package [34].  
21  
22 303

23 304 For the primary outcome, K10 scores at 6 months were compared between the intervention  
24  
25 305 and control groups using mixed linear models (comparing post-intervention scores between  
26  
27 306 groups, adjusting for intake score as a covariate, and treating GP clusters as random slope  
28  
29 307 effects). Analysis was conducted on an intention-to-treat basis according to the study arm for  
30  
31 308 each patient at entry into the study. Analyses were adjusted for all other baseline covariates  
32  
33 309 (age, gender, ethnicity, educational level, and NZiDep). The original protocol stated that  
34  
35 310 analyses would only be adjusted for baseline-values of each score: given some slight  
36  
37 311 imbalance in sociodemographic characteristics it was decided to adjust for other baseline  
38  
39 312 covariates in the main analyses. The originally planned analyses are presented in  
40  
41 313 supplementary materials (overall patterns discussed in the body of the results).  
42  
43 314

44 315 Missing data were handled through the mixed linear models approach to the data, which  
45  
46 316 allows for patients with missing data on the final outcome to be included in analyses, which  
47  
48 317 in effect estimates a final outcome value conditional on the observed data at other follow-up  
49  
50 318 times (i.e. validity being predicated under the assumption that the missing observations are  
51  
52 319 missing at random [MAR], conditional on the observed data [35, 36]). Participants missing  
53  
54 320 all follow-up data were excluded from this main analysis. The null hypothesis for this test  
55  
56 321 was that the K10 scores at 26 weeks (adjusted for baseline score) were not different for the  
57  
58 322 intervention and control groups.

59 323 Sensitivity analysis for missing follow-up data in the K10 primary outcome were planned and  
60  
324 conducted following completion of the main analysis, and hence were not noted in the trial  
325 registration or protocol paper. These analyses covered two scenarios: firstly, an analysis with

1  
2  
3 326 multiple imputation of missing outcomes, conditional on observed baseline  
4  
5 327 sociodemographics and baseline outcome data. This analysis hence included participants who  
6  
7 328 only had baseline data recorded (excluded from the main mixed models analysis), and  
8  
9 329 assumes that the unobserved outcome data are missing at random conditional on observed  
10  
11 330 data: that is, that individuals who were missing from all follow-up data collections had the  
12  
13 331 same outcome profile (on average) as participants with similar profiles at baseline [37]. The  
14  
15 332 second sensitivity analysis explored this missing at random assumption: those missing data  
16  
17 333 post-baseline were (i) assumed to have scores at 6 months that were four points worse than  
18  
19 334 their imputed score in the first sensitivity analysis; (ii) assumed to have had no improvement  
20  
21 335 from baseline (last observation carried forward); and (iii) assumed to have had poorer  
22  
23 336 outcomes at six months than at baseline (4 points worse than baseline). Full details of the  
24  
25 337 imputation procedure and sensitivity analyses are presented in the Supplementary material,  
26  
27 338 and results are summarised and discussed in the main body of the results and discussion.

339

27 340 For the secondary analysis, differences in mean scores on the K10 outcome were reported at  
28  
29 341 8 weeks and 3 months (using the same methods as above, within the mixed linear models  
30  
31 342 framework). Analysis of the HADS and WSAS scores at 8 weeks, 3 months and 6 months  
32  
33 343 utilised the same methods as for the K10 outcome. Analysis of outcomes at 8 weeks and 3  
34  
35 344 months was not specified on the clinical trials registry, but was noted in the previously  
36  
37 345 published protocol paper [27].

346

39 347 The EQ-5D-3L was noted as a secondary outcome for quality of life in the trial registry. This  
40  
41 348 measure was intended as part of an economic analysis that was not implemented, and no  
42  
43 349 other economic data was collected as part of this study.

350

46 351 Intra-class correlation coefficient (ICC) values were calculated for each outcome measure as  
47  
48 352 a summary of clustering according to GPs. Because our analytical models only accounted for  
49  
50 353 clustering at the level of individual GPs, we also examined ICC values when clustering was  
51  
52 354 considered as a multilevel structure (GPs nested within specific practices). Details of the  
53  
54 355 calculation methods are provided in the Supplementary Materials.

356

56 357 Additional treatments received during the trial (including medication and talking therapies)  
57  
58 358 were analysed by study arm, based on self-report data collected at the 6 month follow-up.  
59  
60 359 This descriptive analysis was not specified in the study protocol.

1  
2  
3 360  
4**Confidentiality and data management**

362 Consenting patients had their rights explained along with provision for data confidentiality.  
363 Paper and digital copies of the data were secured in locked storage on the premises of the  
364 University of Otago, Wellington. The questionnaire data was de-identified and entered into a  
365 spreadsheet for subsequent analysis.

**Ethics approval**

367 Ethical approval was received from the Health and Disability Ethics Committees (HDEC),  
368 Ministry of Health (Northern B Health and Disability ethics committee 12/NTB/2).

369  
370 Adverse events were not anticipated in this trial, and arrangements were made to feedback  
371 clinical information to GPs if deemed necessary (e.g., high K10 scores or concerning self-  
372 reported statements about a patient's safety) in the course of data collection.

**Results****GP Participants**

376 A total of 41 practices agreed to participate, with a total of 112 individual GPs consenting to  
377 take part in the study (n=62 for UBI, and n=50 for PAU). Of these GPs, 31 recruited at least  
378 one patient into the study in the UBI arm (from 22 practices), and 21 recruited at least one  
379 patient in the PAU arm (from 12 practices). The numbers of GPs recruiting different numbers  
380 of patients is shown in Supplementary Table R1.

**Patient Participants**

382 Figure 1 summarises the flow of patients into the study and participation in the interventions  
383 and follow-up. A total of 198 patients were referred into the study, and 160 met eligibility  
384 criteria and completed baseline assessments. The vast majority of these completed at least  
385 one post-intervention follow-up (70 / 85 in the UBI arm [82%]; and 69/75 in the PAU group  
386 [92%]) and hence contributed to the data analysis. These patients represented 29 GPs (from  
387 21 practices) and 20 GPs (from 12 practices) in the intervention and control arms  
388 respectively.

389 <Insert figure 1 about here>

1  
2  
3 390 **Baseline data**  
4

5  
6 391 Baseline sociodemographic characteristics of patients are presented in Table 1 for the two  
7 392 study arms. The two groups were roughly comparable at baseline, with a few more male  
8 393 participants and a slightly younger age profile in the UBI arm, but with a greater  
9 394 representation of females in the study overall.  
10  
11  
12

13 395  
14  
15  
16  
17  
18  
19  
20  
21  
22  
23  
24  
25  
26  
27  
28  
29  
30  
31  
32  
33  
34  
35  
36  
37  
38  
39  
40  
41  
42  
43  
44  
45  
46  
47  
48  
49  
50  
51  
52  
53  
54  
55  
56  
57  
58  
59  
60

For peer review only

396 Table 1. Patient sociodemographic profile by study arm.

| Variable          | Level              | Study Group        |                    |
|-------------------|--------------------|--------------------|--------------------|
|                   |                    | UBI (Total n = 85) | PAU (Total n = 75) |
|                   |                    | n (%)              | n (%)              |
| Gender            |                    |                    |                    |
|                   | Female*            | 56 (65.9)          | 57 (76.0)          |
|                   | Male               | 29 (34.1)          | 18 (24.0)          |
| Age Group         |                    |                    |                    |
|                   | 15-24              | 55 (64.7)          | 37 (49.3)          |
|                   | 25-34              | 16 (18.8)          | 15 (20.0)          |
|                   | 35-44              | 3 (3.5)            | 13 (17.3)          |
|                   | 45-54              | 5 (5.9)            | 6 (8.0)            |
|                   | 55+                | 6 (7.1)            | 4 (5.3)            |
| Ethnicity         |                    |                    |                    |
|                   | NZE/Other          | 61 (71.8)          | 54 (72.0)          |
|                   | Māori              | 19 (22.4)          | 14 (18.7)          |
|                   | Pacific            | 4 (4.7)            | 2 (2.7)            |
|                   | Asian              | 1 (1.2)            | 5 (6.7)            |
| Highest education |                    |                    |                    |
|                   | At least secondary | 78 (91.8)          | 71 (94.7)          |
|                   | No secondary level | 7 (8.2)            | 4 (5.3)            |
| NZiDep            |                    |                    |                    |
|                   | 0 (least deprived) | 18 (21.2)          | 11 (14.7)          |
|                   | 1                  | 16 (18.8)          | 17 (22.7)          |
|                   | 2                  | 15 (17.6)          | 11 (14.7)          |
|                   | 3                  | 10 (11.8)          | 10 (13.3)          |
|                   | 4                  | 9 (10.6)           | 12 (16.0)          |
|                   | 5 (most deprived)  | 17 (20.0)          | 14 (18.7)          |

\* Includes one individual self-identifying as Female (transgender)

397

398 Mean baseline scores on the outcome measures were also similar between the two groups  
 399 (Table 2, showing means and standard deviations). Boxplots of the distribution of baseline  
 400 scores on each outcome scale are given in Supplementary Figure R1.

401

402 Table 2. Mean (standard deviation) of baseline scores for outcome measures by study arm

| Outcome variable     | Study Group        |                    |
|----------------------|--------------------|--------------------|
|                      | UBI (Total n = 85) | PAU (Total n = 75) |
|                      | mean (sd)          | mean (sd)          |
| K10*                 | 29.5 (6.2)         | 28.1 (5.7)         |
| HADS – total         | 20.6 (5.9)         | 19.5 (5.1)         |
| HADS – anxiety       | 12.1 (3.6)         | 11.9 (3.5)         |
| HADS – depression    | 8.5 (3.5)          | 7.7 (3.6)          |
| WSAS                 | 23.0 (8.2)         | 19.6 (8.5)         |
| Health Thermometer** | 55.4 (19.9)        | 58.8 (18.7)        |

\* One patient in PAU group missing baseline value.

\*\* Higher scores on the health thermometer indicate better health.

403

#### 404 **Health Outcomes at Follow-up**

405 For the K10 primary outcome at 6 months the mean difference for UBI compared to PAU  
 406 arm favoured the PAU arm (mean adjusted difference = 1.68, 95% CI -1.18 to 4.55; p =  
 407 0.255: adjusted for age, gender, ethnicity, educational level, and NZiDep), as shown in Table  
 408 3 (where positive differences indicate a better outcome for the PAU than UBI arm) While this  
 409 result indicated no significant difference in K10 scores between the UBI and PAU arms (see  
 410 Figure 2), each group had a reasonable improvement in K10 score from baseline (see  
 411 Supplementary Table R2: for the PAU group mean improvement = 7.6, 95% CI 5.5, 9.6; and  
 412 for the UBI group mean improvement = 5.9, 95% CI 4.0, 7.8).

Table 3. Mean difference in primary and secondary outcomes (difference in change relative to baseline)

| Outcome variable     | Mean adjusted difference (UBI minus PAU)* |       |                    |       |                     |       |
|----------------------|-------------------------------------------|-------|--------------------|-------|---------------------|-------|
|                      | 8 weeks                                   |       | 3 months           |       | 6 months            |       |
|                      | mean diff (95% CI)                        | p     | mean diff (95% CI) | p     | mean diff (95% CI)  | p     |
| Primary outcomes**   |                                           |       |                    |       |                     |       |
| K10                  | -0.19 (-2.55, 2.16)                       | 0.872 | 1.53 (-0.79, 3.84) | 0.203 | 1.68 (-1.18, 4.55)  | 0.255 |
| HADS                 | 0.57 (-1.68, 2.82)                        | 0.620 | 0.86 (-1.38, 3.10) | 0.456 | 1.85 (-0.62, 4.31)  | 0.149 |
| Secondary outcomes** |                                           |       |                    |       |                     |       |
| HADS-A               | 0.27 (-1.02, 1.56)                        | 0.684 | 0.70 (-0.60, 2.00) | 0.296 | 1.05 (-0.39, 2.50)  | 0.161 |
| HADS-D               | 0.39 (-0.82, 1.60)                        | 0.533 | 0.24 (-0.96, 1.44) | 0.701 | 0.88 (-0.38, 2.14)  | 0.178 |
| WSAS                 | 0.49 (-2.40, 3.38)                        | 0.740 | 1.32 (-1.58, 4.22) | 0.377 | 0.45 (-2.47, 3.37)  | 0.762 |
| Health Thermometer   | 2.84 (-3.64, 9.31)                        | 0.395 | 1.90 (-4.59, 8.39) | 0.569 | 4.93 (-1.77, 11.62) | 0.156 |

\* Positive differences indicate better improvement in PAU than UBI arm, adjusted for baseline value of score and age, gender, ethnicity, educational level, and NZiDep.

\*\* Number of participants contributing data to each analysis: UBI n = 70, PAU n = 69 (except for K10: PAU n = 68)



1  
2  
3 <insert Figure 2 about here>  
4  
5  
6

7 The mean adjusted difference on the HADS measure at 6 months between UBI and PAU  
8 measures was 1.85 (95% CI = -0.62, 4.31,  $p = 0.149$ ; see Table 3), though both groups again  
9 showed an improvement in mean score from baseline (Supplementary Table R1). Mean  
10 scores at each follow-up time are presented in Figure 3.  
11  
12  
13  
14

15  
16  
17 <insert Figure 3 about here>  
18  
19  
20

21 Similarly, for all secondary outcome measures (HADS Anxiety and Depression sub-scales,  
22 WSAS, and Health Thermometer), the adjusted difference in outcomes at 6 months showed  
23 no significant advantage for either UBI or PAU measures (with relatively broad confidence  
24 intervals for these differences: see Table 3.)  
25  
26  
27  
28

29 Estimates of secondary analyses of outcomes at earlier follow-up times (8 weeks and 3  
30 months) are also presented in Table 3. Differences between UBI and PAU were generally  
31 most pronounced at the final follow-up (6 months) compared to the interim follow-ups.  
32 Trajectories for mean scores in each group are presented in Supplementary Figure R2,  
33 Supplementary Figure R3, Supplementary Figure R4 and Supplementary Figure R5.  
34  
35  
36  
37  
38

### 39 **Ancillary analyses**

40  
41 Supplementary Table R3 presents information on types of additional treatment received for  
42 those who completed the 6-month follow-up assessment (summary not specified in protocol).  
43 Similar proportions of completing patients between study arms were either on medication for  
44 mental health condition(s) at the beginning on the trial (UBI = 31%; PAU 25%), or started  
45 medication during the trial (UBI=18%; PAU=25%). Access to extended GP consultations or  
46 counselling sessions was higher for the PAU arm than for UBI (no UBI patient had an  
47 extended GP consultation, compared to 29% of PAU patients; and 25% of UBI patients had  
48 one or more counselling sessions, compared to 64% of PAU patients.)  
49  
50  
51  
52  
53  
54  
55

56 Intra-class correlation coefficients (ICCs) for the outcome measures are presented in  
57 Supplementary Table R4. For the K10 (ICC = 0.129, 95% CI 0.045 – 0.231) this was  
58 relatively close to the ICC values used in planning the sample size for the study. We also  
59  
60

1  
2  
3 examined clustering effects for GPs as nested within GP practice clusters: this additional  
4 complexity (not implemented in our main analytical models) had little impact on ICCs for the  
5 K10 or HADS measures, though it did suggest slightly higher ICCs (greater clustering of  
6 outcomes than considering GPs alone) for the WSAS and Health Thermometer.  
7  
8  
9

10  
11 We also conducted three sensitivity analyses for our primary outcome of K10 scores at 6  
12 months. These analyses are described in more detail in the Supplementary Methods and  
13 Results.  
14  
15

16  
17 The first sensitivity analysis used the same linear mixed models analysis as the main reported  
18 analysis, but adjusted only for baseline values of the outcome score (as specified in the  
19 original protocol: no adjustment for other baseline covariates). This returned a slightly  
20 smaller mean difference between study arms (again with a poorer mean K10 score in UBI  
21 compared to PAU: difference = 1.07, 95% CI -1.67, 3.82; p=0.447) but does not control for  
22 the covariate imbalance seen in recruited participants (as shown in Table 1).  
23  
24  
25  
26  
27

28 The second and third sensitivity analyses both aimed to consider the impact of loss-to-follow-  
29 up on the primary outcome analysis, assuming data were missing at random (MAR) or  
30 missing not at random (MNAR). Full details of implementation are in the Supplementary  
31 Methods. Both analyses include all randomised participants. An initial table gives the  
32 baseline covariates for those with and without follow-up in the PAU and UBI groups  
33 (Supplementary Table R5).  
34  
35  
36  
37  
38

39 The analysis of outcomes under an MAR assumption (including all randomised participants)  
40 was almost identical to the main results (Supplementary Table R6). Analyses of outcomes  
41 under MNAR assumptions were also not substantively different from the main results  
42 (Supplementary Table R7): the most conservative result returned a mean difference of 2.03  
43 points on the K10 (95% CI -0.63, 4.70: Scenario 1 in Supplementary Table R7) which was  
44 slightly bigger than the mean difference seen in the main results (1.68 points, as per Table 3).  
45  
46  
47  
48  
49

## 50 **Discussion**

51  
52  
53 The brief psychological treatment (UBI) delivered by GPs in New Zealand in routine practice  
54 settings did not lead to better outcomes than practice as usual (PAU) in this pragmatic  
55 efficacy trial, with the point estimate for the primary outcome favouring PAU over UBI.  
56  
57  
58  
59  
60

1  
2  
3 UBI appeared to be slightly less effective than PAU in reducing distress as measured by the  
4 K10 (though the difference was not statistically significant). The K10 was originally  
5 introduced as an assessment measure of psychological distress, but has also been used to  
6 track change in mental health status following intervention [38]. There were no significant  
7 differences in the secondary measures either.  
8  
9  
10

11  
12 We were unable to achieve full recruitment to match the pre-determined sample size: the  
13 study recruited 160 eligible participants across both study arms, against our target of 240  
14 participants with complete data. As such, we were unable to rule out non-inferiority of the  
15 intervention (UBI) compared to PAU in reducing the disability and distress associated with  
16 mild to moderate mental health problems: the bounds of the confidence intervals for the two  
17 main outcomes (K10 and HADS measures) included sizable-magnitude better outcomes for  
18 PAU over UBI (e.g. the upper bound for the K10 was a 4.55 point advantage for PAU).  
19  
20  
21  
22  
23  
24

25 Both UBI and PAU arms showed improvement in clinical outcome over the 6 month course  
26 of the study. These findings are in keeping with other work which demonstrates clinical  
27 effectiveness of brief psychological interventions in primary care settings [39].  
28  
29  
30

31 These results suggest that GPs in both arms were achieving clinical benefit. We cannot rule  
32 out that UBI performs slightly worse than PAU, but our results are inconclusive due to our  
33 reduced sample size. For the last 10-20 years in many OECD jurisdictions there has been a  
34 focus on improving mental health care provision in primary care settings. In New Zealand  
35 this has taken the form of the introduction of locally based primary mental health initiatives,  
36 which have increased access to psychological services and provided opportunity for increased  
37 engagement (and remuneration) by General Practitioners to undertake mental health  
38 consultation work [9]. These opportunities were available to the PAU, and may partially  
39 explain the relative success of this ‘control’ arm in the study.  
40  
41  
42  
43  
44  
45  
46  
47

### 48 ***Strengths of this study***

49

50 We consider the results of this trial a useful addition to the literature for two reasons. Firstly  
51 they describe the introduction of potentially useful adjuncts to existing therapy approaches in  
52 primary care in a randomised controlled setting, and secondly the ‘negative results’ raise  
53 questions about the challenges of conducting pragmatic trials of psychological interventions  
54 in primary care and also about the nature and effectiveness of PAU treatments. Feedback  
55 received from GPs during the training sessions suggested that elements of the UBI such as  
56  
57  
58  
59  
60

1  
2  
3 active listening, goal-setting; making a specific plan and following up on it are already used  
4 in routine practice. UBI had previously been piloted and shown to be both feasible and  
5 acceptable to both clinicians and patients in a general practice setting [25]. It was also able to  
6 be adapted in a culturally responsive way [24]. During the course of the trial and following  
7 its completion there has been significant interest expressed by both patients and GPs in  
8 obtaining copies of the booklets and using elements of the UBI approach in routine  
9 consultations. Verbal feedback suggests that GPs particularly liked the helpful/unhelpful  
10 behaviour chart which was used to discuss how problems were maintained, the explicit  
11 linking of emotional responses to physical symptoms and the use of commitment and  
12 capability rulers (a motivational interviewing strategy).

21 There is an active debate about the optimal balance of intervention components for the  
22 management of common mental health problems, with an increasingly varied range of  
23 options available. Patients potentially have access to traditional face to face intervention with  
24 a therapist, access to materials available on the internet, and further access to rapidly  
25 developing telemedicine and virtual consultation options [40, 41]. Our study shows that over  
26 the course of the trial, patients and GPs were able to adapt the standard pattern of the GP  
27 consultation to a series of three sessions, allowing a more participation from the patient. This  
28 ability to 'disrupt' the traditional pattern of GP consultations is important in an era where  
29 there is recognition in New Zealand and other OECD countries about the need to respond to  
30 the changing context of primary care, particularly in relation to long term conditions  
31 including common mental health problems [42].

42 The choice of 4 points for a minimal clinically important difference on the K10 measure was  
43 selected on the basis of past work [9]. Subsequent research suggests a minimum clinically  
44 important difference of around 7 points (measured in younger people accessing services [43]).  
45 In retrospect, the selection of a smaller difference to detect for the sample size calculation  
46 does not affect the interpretation of results as the current study would have had more than  
47 80% power to detect this revised larger difference between study groups. The original sample  
48 size calculation also indicated that full recruitment would have achieved 80% power to detect  
49 a difference of 3.2 points on the HADS scale: this was a slightly bigger difference than the  
50 minimal clinically important difference cited in the literature [44].  
51  
52  
53  
54  
55  
56  
57  
58  
59  
60

1  
2  
3 We also examined the impact of analytical decisions on our primary outcome, particularly  
4 sensitivity analyses examining the potential impact of participants with no post-baseline data  
5 (excluded from the main analysis) on the reported intervention effect. There was more loss-  
6 to-follow-up observed in the UBI group than in the PAU group. These sensitivity analyses  
7 showed relatively little impact on our estimates under several sets of assumptions  
8 (Supplementary Methods and Results).  
9  
10  
11  
12  
13

### 14 ***Limitations***

15  
16 The difficulties in recruiting a sufficient sample size meant we were unable to establish  
17 benefit or rule out substantial inferiority of UBI compared to PAU. While we did not meet  
18 our recruitment targets, the confidence intervals for our estimates are appropriately wide  
19 (reflecting the achieved sample size) and can be taken as valid plausible bounds for the true  
20 intervention effect. The main challenges of recruitment for trials in mental health have been  
21 described [45-47]. The current study contained specific additional challenges as outlined  
22 below.  
23  
24  
25  
26  
27  
28  
29

30  
31 Firstly, our recruitment was limited by specific entry criteria. We would have preferred to  
32 include all adults aged 18-65 with K10's exceeding 35, but our partner PHO was required to  
33 limit access to services to clients within the targeted access criteria. This reduced our ability  
34 to recruit our planned sample size.  
35  
36  
37

38 This meant we did not meet our planned sample size target despite energetic problem-solving  
39 over a 3 year recruitment period. It also meant that many GPs were not able to recruit any  
40 patients (n=60 of the recruited GPs) or were not using the UBI tool until weeks or even  
41 months after training. This casts doubt on how well GPs would have adhered to the approach  
42 or recalled the principles, potentially affecting the quality of the intervention delivered.  
43  
44  
45  
46  
47  
48

49 Secondly, in this New Zealand context, the GPs in the PAU group had access to a  
50 sophisticated range of therapy options which included providing extended consultations  
51 themselves, as well as referring patients to psychological therapies such as counselling or  
52 CBT delivered by clinical psychologists (Dowell 2009). This introduces the possibility of  
53 post-randomisation bias in the control arm due to differential receipt of these other  
54 treatments: however, we did not collect details from patients on receipt of such treatments,  
55 and thus could not address this potential bias in our analyses. In addition, during the course of  
56  
57  
58  
59  
60

1  
2  
3 the study there were significant changes to the way in which the external psychological  
4 services were delivered in our local PHO, with therapists (mental health professionals) being  
5 placed within practices rather than at a central location making it easier for in-house referral.  
6  
7 Thus the results may not generalise to settings where these additional therapies are  
8  
9 unavailable in day-to-day practice.  
10

11  
12 These changes made the task of demonstrating non-inferiority more challenging. UBI is  
13 consistent with the contemporary primary care stepped care approach that tailors  
14 interventions to symptom severity and response to treatment [48]. The intervention tool  
15 (UBI) used in this study was developed for sub-threshold mental health syndromes, but was,  
16 in practice, applied to moderate-to-severe problems, due to demand from GPs who said they  
17 needed higher thresholds in order to be able to recruit patients. In the New Zealand context it  
18 appears those needing mental health interventions in primary care have more severe problems  
19 than the tool was intended for. The intervention may have performed relatively better than  
20 PAU if applied to a mild-to-moderate group, but this would need further research to ascertain.  
21  
22 The moderate-to-severe group are likely to require longer, more intensive interventions for it  
23 to make a difference.  
24  
25  
26  
27  
28  
29  
30  
31

32  
33 Given the known efficacy of the PAU intervention in this setting [9], the results also attest to  
34 the success of the PAU options rather than a specific failing of the intervention. We might  
35 expect that clinicians who participated in this study would be those who were motivated and  
36 skilled in supporting patients with mental health problems. This is a speculative point, as we  
37 did not collect this kind of data on clinician experience, which is a limitation of the study and  
38 needs to be considered when thinking about the generalisability of the current results to other  
39 settings. It is unclear in this case the extent to which the GPs in the UBI treatment arm were  
40 adhering to the structured approach outlined in the treatment manual. Fidelity and adherence  
41 to training for psychological intervention has been subject to commentary in the literature  
42 [49, 50] and it is unclear as to the extent to which UBI GPs were able to adhere to the  
43 structured manual.  
44  
45  
46  
47  
48  
49  
50

51  
52 The analyses presented here examined several arising issues that were not planned for at the  
53 start of the study. Firstly, there were imbalances on some demographic variables (gender and  
54 age group) between the two study arms. While this is sub-optimal, the analysis of primary  
55 and secondary outcomes adjusted for these and other sociodemographic factors, which means  
56 that these imbalances should be accounted for in the results.  
57  
58  
59  
60

## Conclusion

In this study both the PAU and UBI groups showed improvement in clinical outcome, despite UBI failing to demonstrate superiority or conclusive non-inferiority compared to PAU, though the incomplete recruitment means that the precision of our estimates of treatment effects were wide (95% CIs). This leaves open the question of whether this style of intervention may have potential value in a primary care setting, or whether some elements of this style of intervention are already being applied in practice by some clinicians. Our results did not show conclusive evidence that the UBI added value to usual care with patients with moderate-to-severe symptoms, and we were unable to rule out the possibility that UBI patients may have marginally worse outcomes than the control group. Despite this uncertainty in the outcome, the results provide valuable additional information about the provision of brief psychological interventions in primary care.

An ultra-brief approach such as UBI may add value if restricted to patients with mild mental health problems, as part of a suite of options, with different levels of intensity available to GPs in the primary care setting.

There is a significant need for further research into these issues, given the recognition of mental health problems at a community level [6, 51] and the challenge of providing access to psychological therapy in an effective and cost-effective way [52, 53].

## Figure Legends

Figure 1. Study flowchart of patient participation.

Figure 2. Mean K10 score (95% CI) at baseline and follow up for UBI and PAU study arms.

Figure 3. Mean total HADS score (95% CI) at baseline and follow up for UBI and PAU study arms.

## Abbreviations

UBI: Ultra-brief intervention; PAU: Practice as Usual; GP: General Practitioner; PHO: Primary Health Organisation; K10: Kessler Psychological Distress Scale; HADS: Hospital Anxiety and Depression Scale; WSAS: Work and Social Adjustment Scale; NZDep2006: New Zealand index of individual socioeconomic deprivation.

## Authors' contributions



1  
2  
3 All authors contributed to the study design and study protocol. FM and SC are co-principal  
4 investigators. SC conceived the study, obtained initial funding, and contributed to the  
5 development of the intervention. FM and RT obtained co-funding. FM largely developed the  
6 intervention, led GP training and PHO liaison. AD contributed to the intervention design and  
7 GP training. JS contributed to the study design and designed and conducted the analysis. JS,  
8 FM, AD and SC jointly interpreted the results. RT contributed as research assistant, assisted  
9 with practice recruitment and GP training, led the patient recruitment, data collection,  
10 processing and project management in the latter stages. All authors contributed to and  
11 approved the final manuscript.

### 12 **Funding**

13  
14 Funding for this study was received from the local partner PHO, Compass Health, The  
15 Oakley Mental Health Research Foundation, Wellington Medical Research Foundation, and  
16 the University of Otago Research Fund. Funding was also received from the Health Research  
17 Council of New Zealand for the initial feasibility study, and from Oakley Mental Health  
18 Research Foundation and the University of Otago Research Fund for the Māori adaptation.  
19 The funding bodies had no role in the study design, collection, analysis and interpretation of  
20 data or in the writing of the manuscript.

### 21 **Competing Interests**

22  
23 None

### 24 **Acknowledgements**

25  
26 Thanks to Gabrielle Jenkin, who managed the project in the early phases; Felicity Goodyear  
27 Smith, Simon Hatcher and Sarah Gordon, who contributed to the study design in the early  
28 phases; Amy Munstermann who facilitated liaison with Compass Health; Brigitte Lane, who  
29 recruited practices and led the data collection for the first year and Denise Steers who  
30 contributed as a research assistant.

### 31 **Data sharing**

32  
33 Individual-level patient data are not available to other researchers as participants were not  
34 asked for consent to share their data. The study protocol (including statistical analysis plan) is  
35 available at [27] (DOI:10.1186/s13063-015-0778-y). The code used to conduct the statistical  
36 analysis is available from the second author on request (james.stanley@otago.ac.nz).



## References

1. Oakley-Browne M, Wells J, Scott K. Te Rau Hingengaro: The New Zealand Mental Health Survey. Wellington: Ministry of Health; 2006.
2. Greenberg PE, Kessler RC, Birnbaum HG, et al. The economic burden of depression in the United States: How did it change between 1990 and 2000? *The Journal of Clinical Psychiatry*. 2003;64(12):1465-75.
3. Wang PS, Simon G, Kessler RC. The economic burden of depression and the cost-effectiveness of treatment. *International Journal of Methods in Psychiatric Research*. 2003;12(1):22-33.
4. Horton R. Understanding disease, injury and risk. *The Lancet*. 2012;380:2053-4.
5. Thornicroft G, Chatterji S, Evans-Lacko S, et al. Undertreatment of people with major depressive disorder in 21 countries. *The British Journal of Psychiatry*. 2017;210(2):119-24.
6. The MaGPIe Research Group. The nature and prevalence of psychological problems in New Zealand primary health care: a report on Mental Health and General Practice Investigation. 2003. Contract No.: 1171.
7. Layard R, Clark D, Bell S, et al. The depression report; A new deal for depression and anxiety disorders. London School of Economics; 2006.
8. Hollinghurst S, Kessler D, Peters TJ, et al. Opportunity cost of antidepressant prescribing in England: Analysis of routine data. *BMJ: British Medical Journal*. 2005;330(7498):999-1000.
9. Dowell A, Garrett S, Collings S, et al. Evaluation of the Primary Mental Health Initiatives: summary report 2008. Wellington: Otago University Wellington and Ministry of Health; 2009.
10. The MaGPIe Research Group. The treatment of common mental health problems in general practice. *Fam Pract*. 2006;23:53-9.
11. Mathieson F, Collings S, Dowell A. Sub-threshold mental health syndromes: Finding an alternative to the medication of unhappiness. *Journal of Primary Health Care*. 2009;1(1):74-7.
12. American Psychiatric Association. Diagnostic and statistical manual of mental disorders (5th ed.). Washington, DC2013.
13. Wagner H, Burns B, Broadhead W, et al. Minor depression in family practice: functional morbidity, co-morbidity, service utilisation and outcomes. *Psychological Medicine*. 2000;30:1377-90.
14. Collings S, MaGPIe Research Group. Disability and the detection of mental disorder in primary care. *Soc Psychiatry Psychiatr Epidemiol*. 2005;40(12):994-1002.
15. Kessler R, Zhao S, Blazer D, et al. Prevalence, correlates, and course of minor depression in the national comorbidity survey. *Journal of Affective Disorders*. 1997;45(1-2):19-30.
16. Sadek N, Bona J. Subsyndromal symptomatic depression: a new concept. *Depression and Anxiety*. 2000;12:30-9.
17. Dowell A, Garrett S, Collings S, et al. Primary Mental Health Initiatives: Interim Report. Wellington: School of Medicine & Health Sciences, University of Otago, Wellington; 2007.
18. Dew K, Dowell A, McLeod D, et al. "This glorious twilight zone of uncertainty": mental health consultations in general practice in New Zealand. *Social Science & Medicine* 2005;61(6):1189-200.
19. Mathieson F, Collings S, Dowell A, et al. Collaborative research: A case example of dissemination of CBT in primary care. *the Cognitive Behaviour Therapist Vol 6 2013, ArtID e4*. 2013;6.
20. Kessler D, Lewis G, Kaur S, et al. Therapist-delivered internet psychotherapy for depression in primary care: A randomised controlled trial. *The Lancet*. 2009;374(9690):628-34.
21. Jorm AF, Griffiths KM. Population promotion of informal self help strategies for early intervention against depression and anxiety. *Psychological Medicine*. 2006;36:3-6.

22. Gellatly J, Bower P, Hennessy S, et al. What makes self-help interventions effective in the management of depressive symptoms? Meta-analysis and meta-regression. *Psychological Medicine*. 2007;37(9):1217-28.
23. Gellatly J, Chisnall L, Seccombe N, et al. @Home eTherapy Service for People with Common Mental Health Problems: An Evaluation. *Behavioural and Cognitive Psychotherapy*. 2017:1-6.
24. Mathieson F, Mihaere K, Collings S, et al. Maori cultural adaptation of a brief mental health intervention in primary care. *Journal of Primary Health Care*. 2012;4(3):231-8.
25. Collings S, Mathieson F, Dowell A, et al. Acceptability of a guided self-help mental health intervention in general practice. *Fam Pract*. 2012;29(1):43-9.
26. Kessler R, Andrews G, Clope LJ, et al. Short screening scales to monitor population prevalences and trends in non-specific psychological distress. *Psychological Medicine*. 2002;32:959-76.
27. Collings S, Mathieson F, Dowell A, et al. Clinical effectiveness of an ultra-brief intervention for common mental health syndromes in primary care: study protocol for a cluster randomized controlled trial. *Trials*. 2015;16(260):1-7.
28. Andrews G, Slade T. Interpreting scores on the Kessler Psychological Distress Scale (K10). *Australian and New Zealand Journal of Public Health*. 2001;25(6):494-7.
29. Ministry of Health. Ethnicity Data Protocols for the Health and Disability Sector. In: Health Mo, editor. Wellington, New Zealand 2004.
30. Zigmond AS, Snaith RP. The hospital anxiety and depression scale. *Acta Psychiatrica Scandinavica*. 1983;67(6):361-70.
31. Mundt JC, Marks IM, Shear MK, et al. The work and social adjustment scale: a simple measure of impairment in functioning. *British Journal of Psychiatry*. 2002;180:461-4.
32. Spinhoven P, Ormel J, Sloekers PP, et al. A validation study of the Hospital Anxiety and Depression Scale (HADS) in different groups of Dutch subjects. *Psychological Medicine*. 1997;27(2):363-170.
33. Bates D, Maechler M, Bolker B, et al. Fitting Linear Mixed-Effects Models Using lme4. *Journal of Statistical Software*. 2015;67(1):1-48.
34. van Buuren S, Groothuis-Oudshoorn K. Mice: Multivariate Imputation by Chained Equations in R. *Journal of Statistical Software*. 2011;45(3):1-67.
35. DeSouza CM, Legedza AT, Sankoh AJ. An overview of practical approaches for handling missing data in clinical trials. *Journal of Biopharmaceutical Statistics*. 2009;19(6):1055-73.
36. Beunckens C, Molenberghs G, Kenward MG. Direct likelihood analysis versus simple forms of imputation for missing data in randomized clinical trials. *Clinical Trials*. 2005;2(5):379-86.
37. Sullivan TR, White IR, Salter AB, et al. Should multiple imputation be the method of choice for handling missing data in randomized trials? *Statistical Methods in Medical Research* 2018;27(9):2610-26.
38. Sunderland M, Wong N, Hilvert-Bruce Z, et al. Investigating trajectories of change in psychological distress amongst patients with depression and generalised anxiety disorder treated with internet cognitive behavioural therapy. *Behaviour research and therapy*. 2012;Jun 30;50(6):374-80.
39. Cape J, Whittington C, Buszewicz M, et al. Brief psychological therapies for anxiety and depression in primary care: meta-analysis and meta-regression. 2010;8(38).
40. Gilbody S, Littlewood E, Hewitt C, et al. Computerised cognitive behaviour therapy (cCBT) as treatment for depression in primary care (REEACT trial): large scale pragmatic randomised controlled trial. *British Medical Journal*. 2015;351(h5627).
41. Andersson G, Carlbring P, Hadjistavropoulos HD. Internet-based cognitive behavior therapy. *The science of cognitive behavioral therapy*. San Diego, CA: Elsevier Academic Press; US; 2017. p. 531-49.
42. Baird M, Blount A, Brungardt S, et al. Joint principles: integrating behavioral health care into the patient-centered medical home. *The Annals of Family Medicine*. 2014;12(2):183-5.

- 1  
2  
3 43. Rickwood D, Mazzer K, Telford N, et al. Changes in psychological distress and psychosocial  
4 functioning in young people visiting headspace centres for mental health problems. *The Medical*  
5 *Journal of Australia*. 2015;202(10):537-42.  
6  
7 44. Puhan MA, Frey M, Buchi S, et al. The minimal important difference of the hospital anxiety  
8 and depression scale in patients with chronic obstructive pulmonary disease. . *Health and Quality of*  
9 *Life Outcomes*. 2008;6(46).  
10 45. Weisfeld V, English RA, Claiborne AB. *Public Engagement and Clinical Trials: New Models and*  
11 *Disruptive Technologies: Workshop Summary.*: National Academies Press; 2012.  
12 46. McDonald AM, Knight RC, Campbell MK, et al. What influences recruitment to randomised  
13 controlled trials? A review of trials funded by two UK funding agencies. *Trials*. 2006;7(7):1-9.  
14 47. Mason VL, Shaw A, Wiles NJ, et al. GPs' experiences of primary care mental health research:  
15 a qualitative study of the barriers to recruitment. *Fam Pract*. 2007;24(5):518-25.  
16 48. Dowell A, Morris C, Dodds T, et al. Psychological interventions in primary care mental health.  
17 In: G. I, editor. *Companion to Primary Care Mental Health*. London: Radcliffe Publishing; 2012.  
18 49. Bellg AJ, Borrelli B, B. R, et al. Enhancing treatment fidelity in health behavior change  
19 studies: best practices and recommendations from the NIH Behavior Change Consortium. *Health*  
20 *Psychology*. 2004;23(5):443-51.  
21 50. Morton L, Elliott A, Thomas R, et al. Developmental study of treatment fidelity, safety and  
22 acceptability of a Symptoms Clinic intervention delivered by General Practitioners to patients with  
23 multiple medically unexplained symptoms. *Journal of psychosomatic research*. 2016;May 31(84):37-  
24 43.  
25 51. Whiteford HA, Degenhardt L, Rehm J, et al. Global burden of disease attributable to mental  
26 and substance use disorders: findings from the Global Burden of Disease Study 2010. *The Lancet*.  
27 2013;Nov 15;382(9904): 1575-86.  
28 52. Gyani A, Shafran R, Layard R, et al. Enhancing recovery rates: lessons from year one of IAPT.  
29 *Behaviour Research and Therapy*. 2013;Sep 30;51(9):597-606.  
30 53. Clark DM. Implementing NICE guidelines for the psychological treatment of depression and  
31 anxiety disorders: the IAPT experience. *International review of psychiatry*. 2011;Aug 1;23(4):318-27.  
32  
33  
34  
35  
36  
37  
38  
39  
40  
41  
42  
43  
44  
45  
46  
47  
48  
49  
50  
51  
52  
53  
54  
55  
56  
57  
58  
59  
60



# CONSORT

TRANSPARENT REPORTING of TRIALS

## CONSORT 2010 Flow Diagram



1  
2  
3  
4  
5  
6  
7  
8  
9  
10  
11  
12  
13  
14  
15  
16  
17  
18  
19  
20  
21  
22  
23  
24  
25  
26  
27  
28  
29  
30  
31  
32  
33  
34  
35  
36  
37  
38  
39  
40  
41  
42  
43  
44  
45  
46  
47  
48  
49  
50  
51  
52  
53  
54  
55  
56  
57  
58  
59  
60



Figure 2. Mean K10 score (95% CI) at baseline and follow up for UBI and PAU study arms.

90x90mm (300 x 300 DPI)



Figure 3. Mean total HADS score (95% CI) at baseline and follow up for UBI and PAU study arms.

90x90mm (300 x 300 DPI)

Supplementary Figure R1. Boxplots of baseline scores for each outcome measure (dots show each individual's score on that measure).

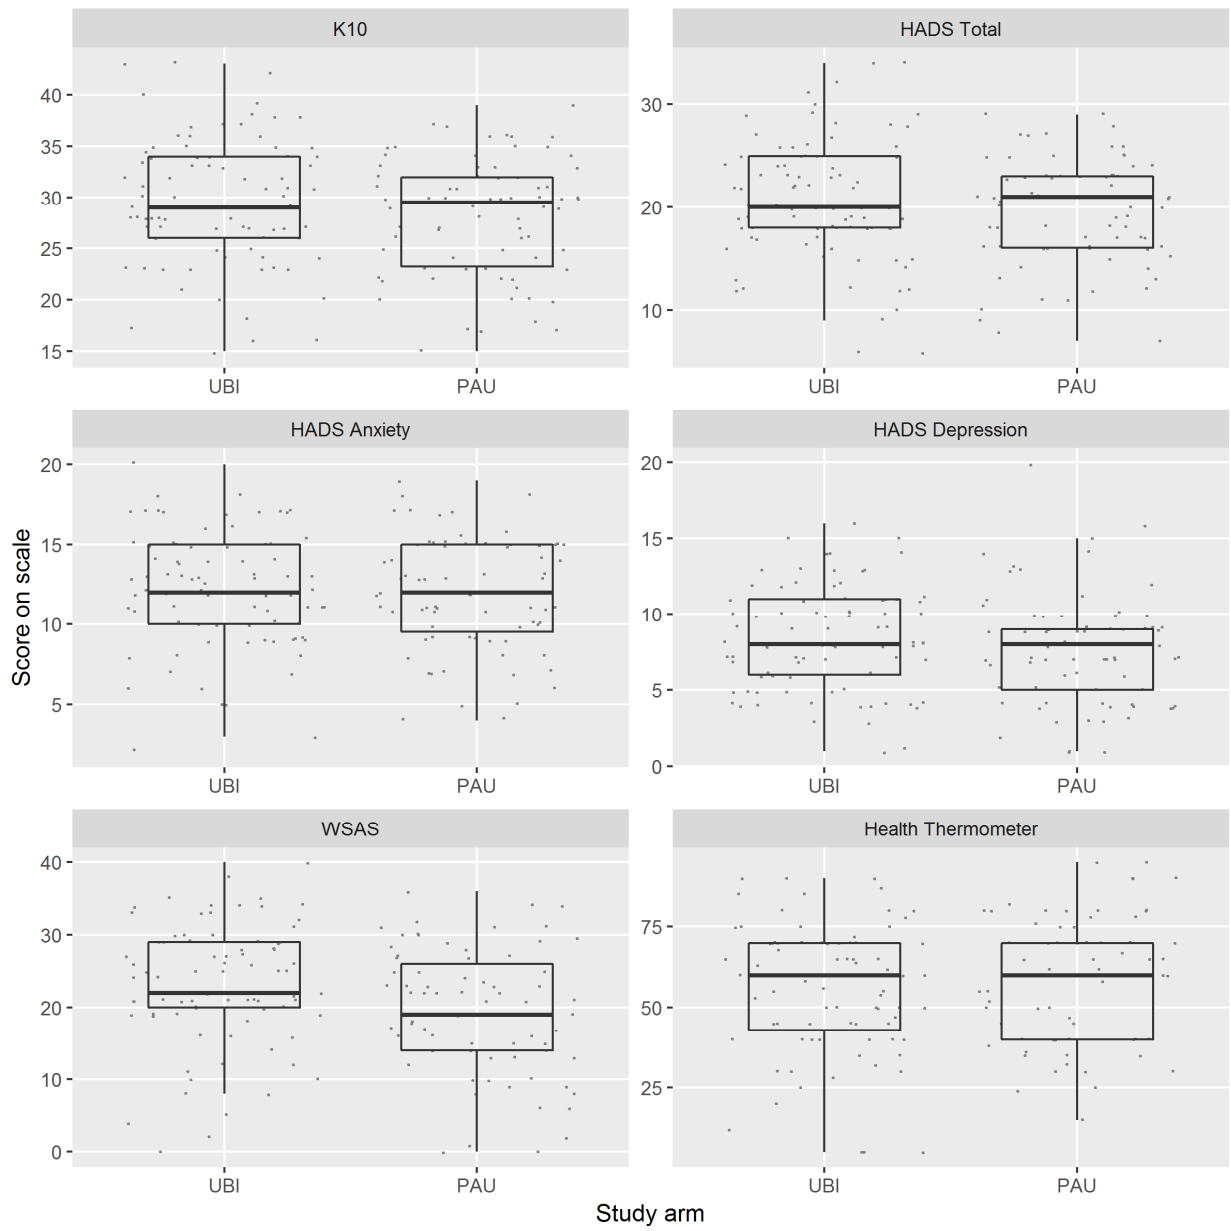

Supplementary Table R1. Number of patients recruited into study by GPs in UBI and PAU study arms.

| Number of patients recruited by GP | UBI<br>(n GPs*) | PAU<br>(n GPs*) |
|------------------------------------|-----------------|-----------------|
| 1                                  | 12              | 8               |
| 2                                  | 4               | 2               |
| 3                                  | 7               | 5               |
| 4                                  | 3               | 0               |
| 5                                  | 1               | 2               |
| 6                                  | 2               | 0               |
| 7                                  | 1               | 0               |
| 8                                  | 1               | 1               |
| 9                                  | 0               | 2               |
| 12                                 | 0               | 1               |
| <b>Total number of GPs</b>         | <b>31</b>       | <b>21</b>       |

\* Indicates the number of GPs recruiting the stated number of patients (e.g. 12 GPs in the UBI arm recruited one patient each; and five GPs in the PAU arm recruited three patients each).

Supplementary Table R2. Mean improvements from baseline to 6 month follow-up for each outcome measure.

| Outcome measure    | Mean at baseline<br>(both arms) | Mean improvement (95% CI)<br>from baseline to 6 months |                 |
|--------------------|---------------------------------|--------------------------------------------------------|-----------------|
|                    |                                 | PAU                                                    | UBI             |
| K10                | 28.8                            | 7.6 (5.5, 9.6)                                         | 5.9 (4.0, 7.8)  |
| HADS               | 19.9                            | 7.0 (5.3, 8.7)                                         | 5.2 (3.5, 6.9)  |
| HADS-A             | 12                              | 4.3 (3.3, 5.3)                                         | 3.2 (2.2, 4.2)  |
| HADS-D             | 7.9                             | 2.8 (1.9, 3.7)                                         | 1.9 (1.0, 2.8)  |
| WSAS               | 21.3                            | 7.7 (5.7, 9.7)                                         | 7.2 (5.3, 9.2)  |
| Health Thermometer | 57.5                            | 14.0 (9.3, 18.6)                                       | 9.0 (4.4, 13.7) |



1  
2  
3  
4  
5  
6  
7  
8  
9  
10  
11  
12  
13  
14  
15  
16  
17  
18  
19  
20  
21  
22  
23  
24  
25  
26  
27  
28  
29  
30  
31  
32  
33  
34  
35  
36  
37  
38  
39  
40  
41  
42  
43  
44  
45  
46  
47  
48  
49  
50  
51  
52  
53  
54  
55  
56  
57  
58  
59  
60

Supplementary Figure R2. Mean HADS Anxiety score (95% CI) at baseline and follow up for UBI and PAU study arms.

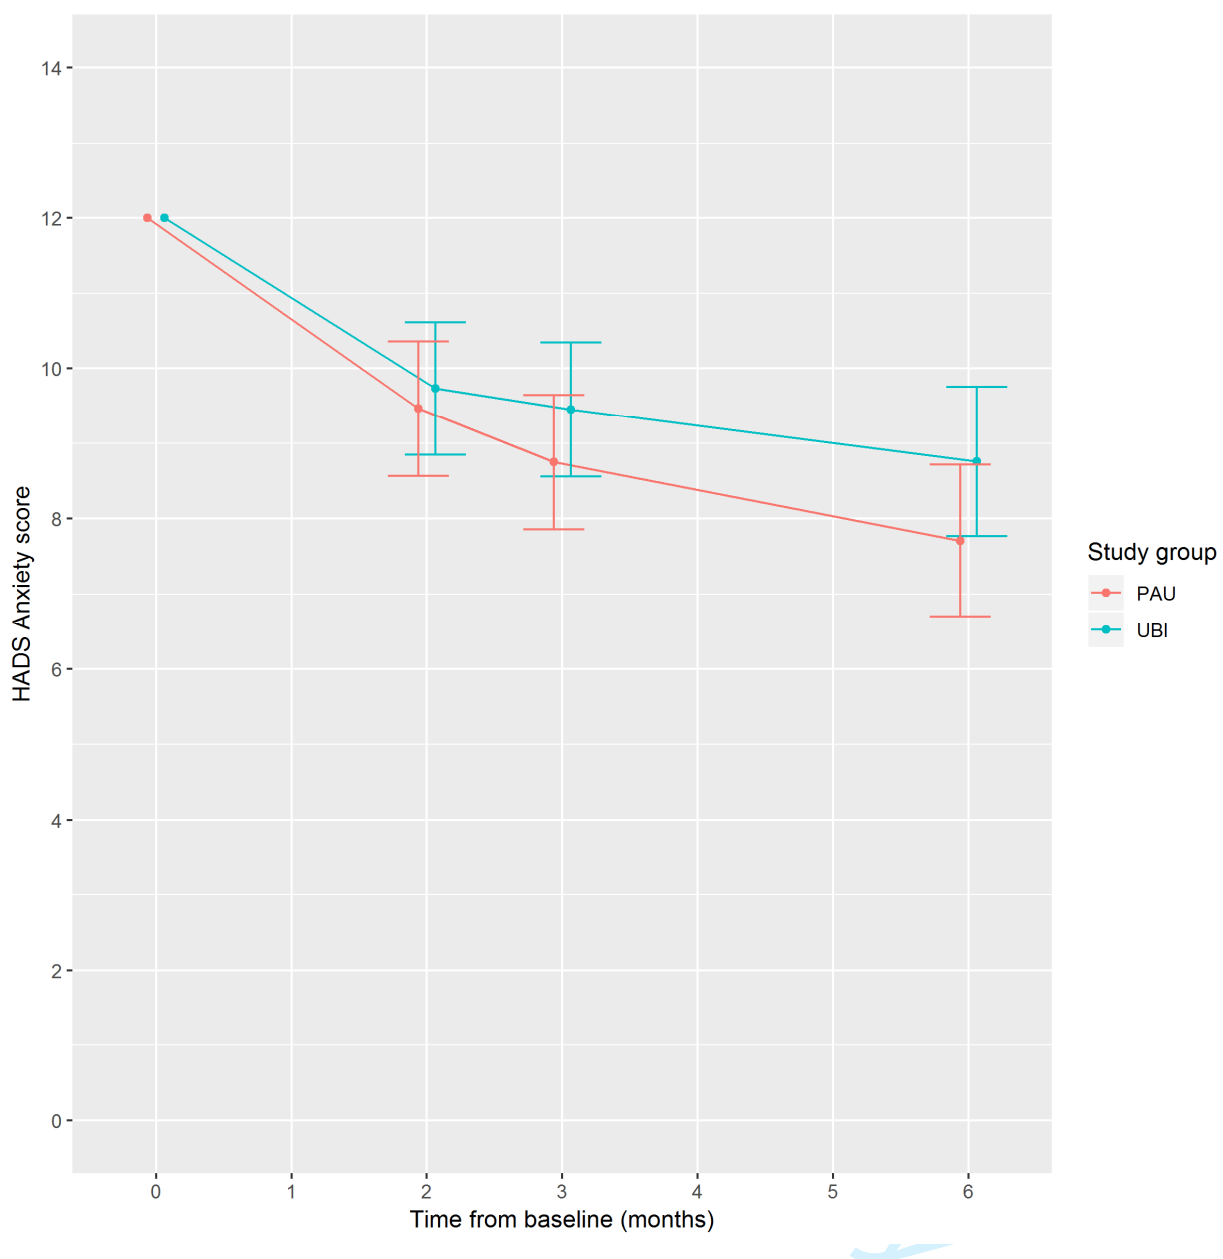

Supplementary Figure R3. Mean HADS Depression score (95% CI) at baseline and follow up for UBI and PAU study arms.



1  
2  
3  
4  
5  
6  
7  
8  
9  
10  
11  
12  
13  
14  
15  
16  
17  
18  
19  
20  
21  
22  
23  
24  
25  
26  
27  
28  
29  
30  
31  
32  
33  
34  
35  
36  
37  
38  
39  
40  
41  
42  
43  
44  
45  
46  
47  
48  
49  
50  
51  
52  
53  
54  
55  
56  
57  
58  
59  
60

Supplementary Figure R4. Mean WSAS score (95% CI) at baseline and follow up for UBI and PAU study arms.

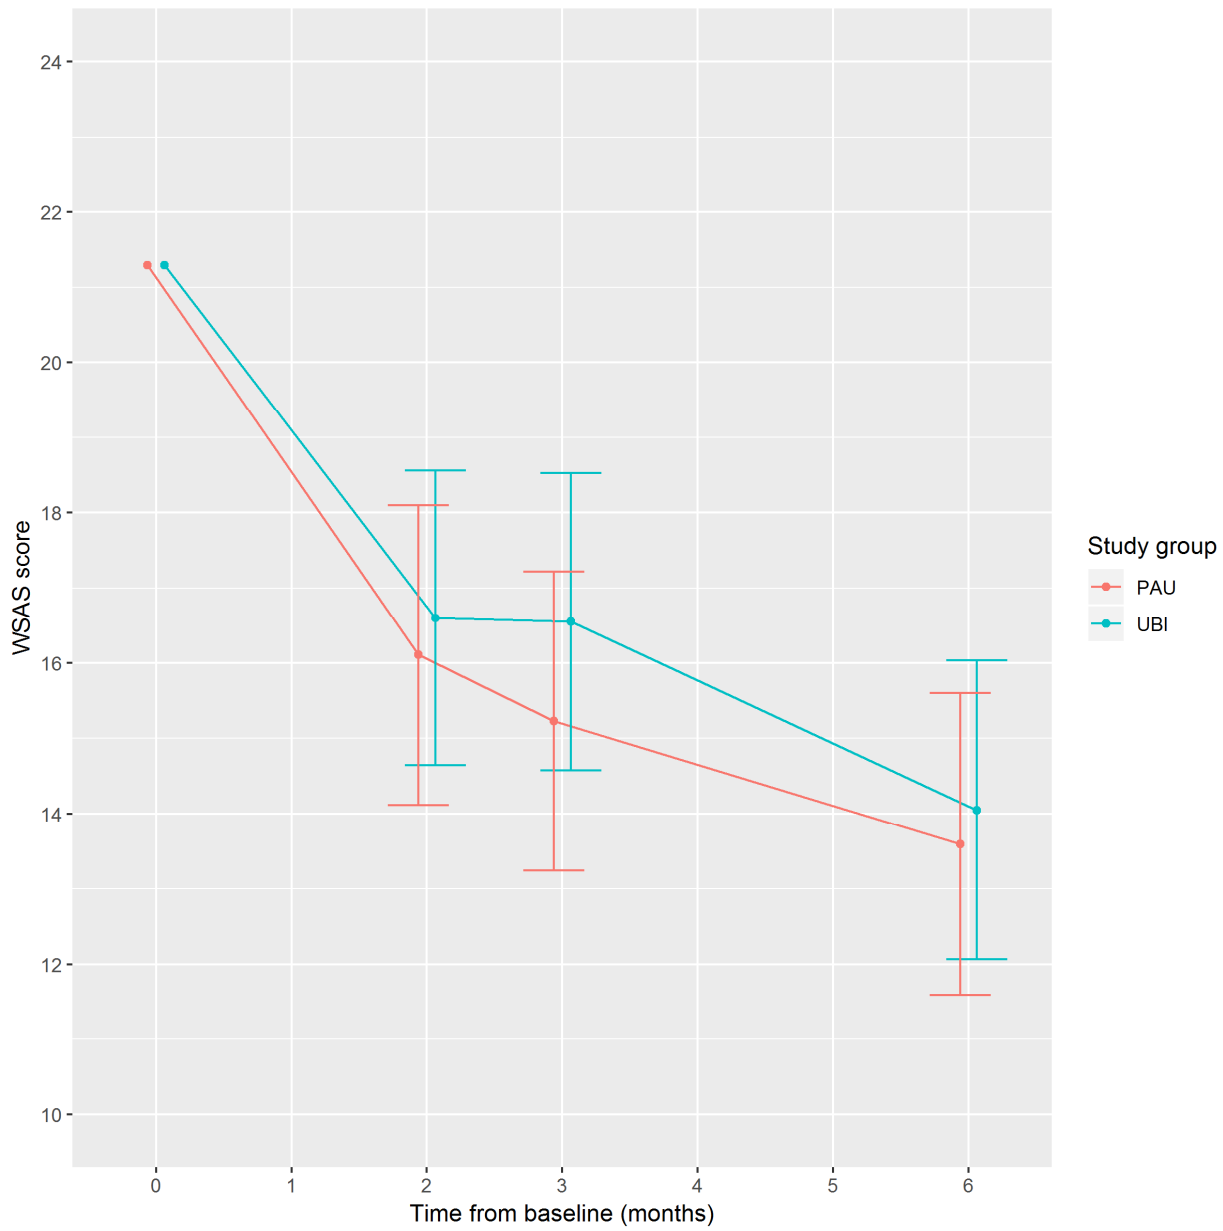

Supplementary Figure R5. Mean Health Thermometer score (95% CI) at baseline and follow up for UBI and PAU study arms.

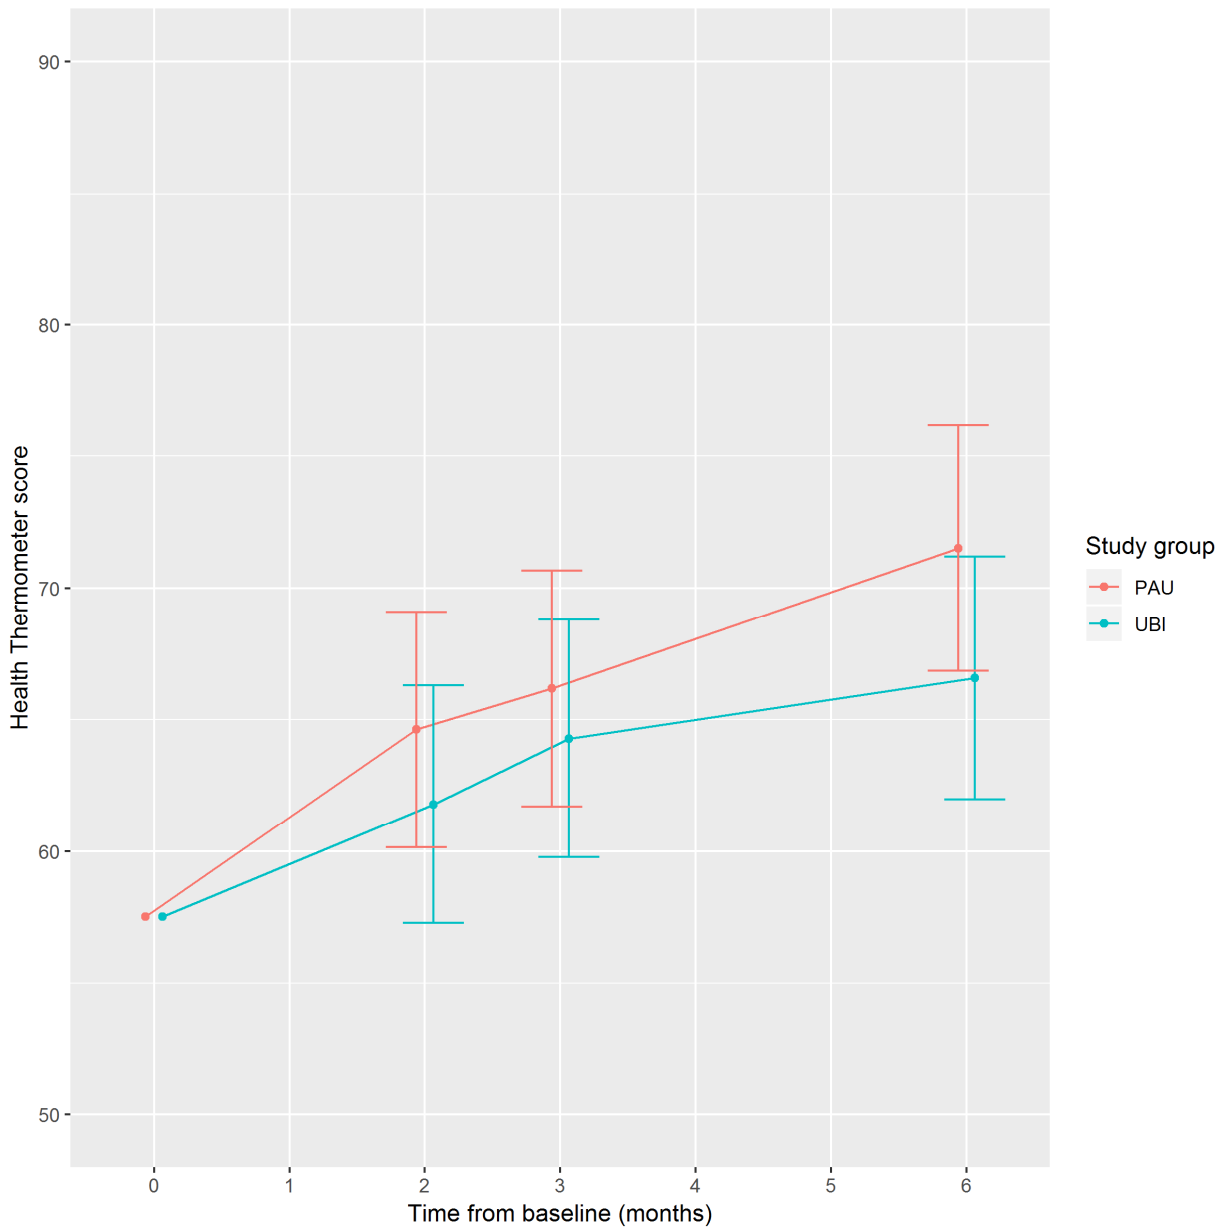

Supplementary Table R3. Additional treatment received during UBI trial (from question on 6 month interview)

| Type of additional treatment          | UBI<br>n (%) | PAU<br>n (%) |
|---------------------------------------|--------------|--------------|
| <b>Medication status during trial</b> |              |              |
| no relevant medication                | 33 (51%)     | 34 (52%)     |
| on medication prior to entering trial | 20 (31%)     | 16 (24%)     |
| started medication during trial       | 12 (18%)     | 16 (24%)     |
| did not complete question*            | 20           | 9            |
| <b>Extended GP consultations (n)</b>  |              |              |
| 0                                     | 68 (100%)    | 46 (71%)     |
| 1-2                                   | 0            | 8 (12%)      |
| 3-5                                   | 0            | 9 (14%)      |
| 6-10                                  | 0            | 2 (3%)       |
| did not complete question*            | 17           | 10           |
| <b>Counselling sessions (n)</b>       |              |              |
| 0                                     | 44 (75%)     | 21 (36%)     |
| 1-2                                   | 4 (7%)       | 13 (22%)     |
| 3-5                                   | 2 (3%)       | 11 (19%)     |
| 6-10                                  | 7 (12%)      | 12 (20%)     |
| 11+                                   | 2 (3%)       | 2 (3%)       |
| did not complete question*            | 26           | 16           |

\* Did not complete 6 month questionnaire and hence no data (UBI n=16; PAU n=9)

Did not answer Meds question at 6 months (UBI: n=4; PAU: n=1)

Did not answer Extended GP question at 6 months (UBI: n=1; PAU: n=1)

Did not answer Counselling question at 6 months (UBI: n=10; PAU: n=7)

Supplementary Methods: Calculation of intra-class correlation coefficients (ICCs) for outcome measures.

ICCs were calculated for each outcome measure in the study to summarise the impact of clustering of outcomes by GPs. These were calculated using simplified mixed linear models with random intercept terms for GPs and no adjustment for covariates. ICCs were calculated in R 3.2.3, using the lme4 package, with their 95% confidence intervals based on 1000 bootstrap resamples calculated using the bootMer() function.

ICCs were also calculated for a scenario where clustering was considered across both the individual GPs (as per the above paragraph) and the practices in which GPs worked. The difference between these two sets of estimates can be considered as the additional impact of clustering of patient responses induced by practices above and beyond clustering induced by GPs. As seen in Supplementary Table R4, there was little impact of this additional clustering on ICCs for the longer health measures (K10 and HADS: minimal difference in ICCs between the two adjustment scenarios) but there appeared to be some additional impact of practice-level clustering for the Work and Social Adjustment Scale (WSAS) and the one-item Health Thermometer.

Supplementary Table R4. Intra-class correlation coefficients (ICCs) for each outcome measure in the study.

| Outcome measure    | GP clustering only* |                | GP and Practice clustering** |                 |
|--------------------|---------------------|----------------|------------------------------|-----------------|
|                    | ICC                 | (95% CI)       | ICC                          | (95% CI)        |
| K10                | 0.129               | (0.045, 0.231) | 0.139                        | (0.006, 0.235)  |
| HADS (total)       | 0.091               | (0.019, 0.189) | 0.104                        | (<0.001, 0.185) |
| HADS Anxiety       | 0.098               | (0.019, 0.198) | 0.106                        | (<0.001, 0.190) |
| HADS Depression    | 0.140               | (0.047, 0.250) | 0.148                        | (0.018, 0.233)  |
| WSAS               | 0.188               | (0.081, 0.308) | 0.240                        | (0.076, 0.348)  |
| Health Thermometer | 0.088               | (0.013, 0.177) | 0.135                        | (0.005, 0.219)  |

\* ICC calculated using only GP-level random effects.

\*\* ICC calculated using random effects for GPs nested within GP practices (joint clustering effect).

Reference for lmer package:

Douglas Bates, Martin Maechler, Ben Bolker, Steve Walker (2015). Fitting Linear Mixed-Effects Models Using lme4. Journal of Statistical Software, 67(1), 1-48. doi:10.18637/jss.v067.i01.

Supplementary Table R5. Sociodemographic and clinical characteristics at baseline by intervention arm (UBI or Practice as Usual [PAU]) and follow-up status.

| Factor                     | Level               | UBI follow-up (FU) status |             | PAU follow-up (FU) status |             |
|----------------------------|---------------------|---------------------------|-------------|---------------------------|-------------|
|                            |                     | Lost to FU                | some FU     | Lost to FU                | some FU     |
| Total                      | All participants    | 15 (100%)                 | 70 (100%)   | 6 (100%)                  | 69 (100%)   |
| Ethnicity                  | NZE Other           | 10 (67%)                  | 51 (73%)    | 5 (83%)                   | 49 (71%)    |
|                            | Māori               | 5 (33%)                   | 14 (20%)    | 1 (17%)                   | 13 (19%)    |
|                            | Pacific             | 0 (0%)                    | 4 (6%)      | 0 (0%)                    | 2 (3%)      |
|                            | Asian               | 0 (0%)                    | 1 (1%)      | 0 (0%)                    | 5 (7%)      |
| Age grp                    | 15-24               | 11 (73%)                  | 44 (63%)    | 6 (100%)                  | 31 (45%)    |
|                            | 25-34               | 2 (13%)                   | 14 (20%)    | 0 (0%)                    | 15 (22%)    |
|                            | 35-44               | 1 (7%)                    | 2 (3%)      | 0 (0%)                    | 13 (19%)    |
|                            | 45-54               | 0 (0%)                    | 5 (7%)      | 0 (0%)                    | 6 (9%)      |
|                            | 55+                 | 1 (7%)                    | 5 (7%)      | 0 (0%)                    | 4 (6%)      |
| Gender                     | Female              | 7 (47%)                   | 49 (70%)    | 3 (50%)                   | 54 (78%)    |
|                            | Male                | 8 (53%)                   | 21 (30%)    | 3 (50%)                   | 15 (22%)    |
| NZiDep                     | 0                   | 3 (20%)                   | 15 (21%)    | 0 (0%)                    | 11 (16%)    |
|                            | 1                   | 2 (13%)                   | 14 (20%)    | 1 (17%)                   | 16 (23%)    |
|                            | 2                   | 3 (20%)                   | 12 (17%)    | 2 (33%)                   | 9 (13%)     |
|                            | 3                   | 0 (0%)                    | 10 (14%)    | 0 (0%)                    | 10 (14%)    |
|                            | 4                   | 2 (13%)                   | 7 (10%)     | 1 (17%)                   | 11 (16%)    |
|                            | 5                   | 5 (33%)                   | 12 (17%)    | 2 (33%)                   | 12 (17%)    |
| Education                  | At least secondary  | 15 (100%)                 | 63 (90%)    | 6 (100%)                  | 65 (94%)    |
|                            | No secondary        | 0 (0%)                    | 7 (10%)     | 0 (0%)                    | 4 (6%)      |
| Outcome scores at baseline |                     | mean (sd)                 | mean (sd)   | mean (sd)                 | mean (sd)   |
|                            | K10                 | 28.4 (5.9)                | 29.8 (6.3)  | 32.2 (5.3)                | 27.8 (5.6)  |
|                            | HADS                | 20.2 (7.5)                | 20.7 (5.5)  | 23.0 (3.0)                | 19.2 (5.1)  |
|                            | HADS Anxiety        | 11.9 (4.9)                | 12.2 (3.2)  | 13.2 (2.9)                | 11.7 (3.5)  |
|                            | HADS Depression     | 8.3 (3.2)                 | 8.5 (3.5)   | 9.8 (3.7)                 | 7.5 (3.6)   |
|                            | WSAS                | 21.7 (7.8)                | 23.3 (8.3)  | 23.8 (5.2)                | 19.2 (8.7)  |
|                            | Health Thermometer* | 57.4 (16.5)               | 55.0 (20.6) | 50.5 (17.4)               | 59.5 (18.7) |

\* Health Thermometer: Lower scores indicate poorer health state.

**Supplementary Results Text 1: Mean difference in K10 primary outcome at 6 months, adjusting only for baseline scores.**

The protocol for the primary outcome (K10) analysis only specified that linear mixed model would be adjusted for baseline scores. The results from the primary analysis reported in the main paper were also adjusted for baseline sociodemographic variables (repeated in Supplementary Table R6 below from Table 3).

The analysis of K10 scores at 6 months (adjusted solely for baseline K10 scores) returned a slightly smaller mean difference between groups (poorer mean K10 score in UBI compared to PAU: difference = 1.07, 95% CI -1.67, 3.82).

This supplementary analysis draws on all participants with at least one follow-up observation. All other elements of the statistical model (accounting for clustering by GP and repeat observations for the same participant) are handled as per the main analysis (see Methods of main paper).

Supplementary Table R6. Primary outcome (K10) differences between UBI and PAU study arms at 6 months under different covariate adjustment models.

| Analysis                                                        | Mean difference in K10<br>at 6 months (95% CI) |
|-----------------------------------------------------------------|------------------------------------------------|
| <b>Analysis of all participants with some follow-up (n=139)</b> |                                                |
| Adjusted for baseline covariates *                              | 1.68 (-1.18, 4.55)                             |
| Adjusted for baseline K10 score only**                          | 1.07 (-1.67, 3.82)                             |

\* Result as reported in Table 3 of main paper.

\*\* Analysis in line with specifications in protocol paper.



## Supplementary Methods and Results: Sensitivity analysis to account for participants with no follow-up data.

The following analyses were implemented following initial peer-review, and were not *a priori* components of the analysis plan. Results from analyses are presented in Supplementary Table XX below, following the description of the methods and results. These sensitivity analyses aimed to consider the impact of complete loss-to-follow-up (participants no post-baseline data) on the primary outcome analysis, using two different frameworks assuming data were missing at random (MAR) or missing not at random (MNAR). A discussion of potential impacts of loss-to-follow-up on study results (attrition bias) is available in Bell et al. (2012) and discussion of missing data mechanisms can be read elsewhere (e.g. Bell et al. (2012); Newgard et al. (2015) and Sullivan et al. (2018)).

### References for subsequent section:

Bell ML, Kenward MG, Fairclough DL, Horton NJ. Differential dropout and bias in randomised controlled trials: when it matters and when it may not. *BMJ*. 2013;346:e8668.

Newgard CD, Lewis RJ. Missing Data: How to Best Account for What Is Not Known. *JAMA*. 2015;314:940-1.

Sullivan TR, White IR, Salter AB, Ryan P, Lee KJ. Should multiple imputation be the method of choice for handling missing data in randomized trials? *Stat Methods Med Res*. 2018;27:2610-26.

van Buuren S, Groothuis-Oudshoorn K. mice: Multivariate Imputation by Chained Equations in R. *Journal of Statistical Software*. 2011;45(3):1-67.

### Imputation of outcomes under the Missing at Random (MAR) assumption.

Imputation was implemented using the mice package in R (van Buuren et al., 2011). All primary and secondary outcomes at all follow-up times were included in the imputation model, along with sociodemographic variables at baseline (gender/sex, age group, ethnicity, education, and NZiDep category: see Table 1 of the main paper for details about the specific sub-groups within each of these variables). Imputation was conducted separately for the intervention (UBI) and control (PAU) groups (Sullivan et al., 2018).

A total of 50 imputation datasets were created; each dataset was analysed for the primary outcome following the methods used for the main analysis in the paper (linear mixed model for K10 score at 6 months, adjusted for baseline K10 score and sociodemographic covariates). The estimates from these 50 models were then combined using Rubin's rules to produce the point estimate and 95% confidence interval (which takes into account variability in the effect estimates across all the imputed datasets.)

The intervention effect at 6 months is presented in Supplementary Table R7: under the assumption that the missing data mechanism was MAR (implemented using multiple imputation) there was a mean difference in K10 scores of 1.78 points (95% CI -0.96, 4.51; positive scores indicate better outcomes in the practice as usual [PAU] arm compared to UBI). This was almost identical to the estimates from the linear mixed model reported in Table 3 (repeated in Supplementary Table R7 for reference) which also assumed an MAR mechanism for missing data (conditional on the adjusted baseline variables in that model), but the analysis in the main results only included participants with at least one post-baseline measurement.

### Imputation of outcomes under the Missing Not At Random (MNAR) assumption.

Analysis assuming that outcome values were MNAR was repeated under several conditions to explore the potential impact of different types of missing data mechanisms. These analyses all assumed that participants who did not participate in any follow-up did worse than those who participated in at least one follow-up.

In all scenarios, those who were not lost-to-follow-up (i.e. had at least one follow-up measure) kept either their original K10 scores at 6 months, or their imputed values at 6 months (for those with only partial follow-up: using the same imputed datasets as analysed under the MAR assumption). Imputation under MAR principles was considered reasonable for those with at least one follow-up measurement (but no 6-month measurement), as the follow-up measurements were all timed well after the conclusion of the core interventions delivered as part of the trial.

**In MNAR Scenario 1:** Individuals with no follow-up data were given a K10 score at six months set to 4 points lower than their imputed score.

**In MNAR Scenario 2:** Individuals with no follow-up data were given the same K10 score at six months that they had at baseline. This is effectively a “last observation carried forward” analysis for those with no follow-up data.

**In MNAR Scenario 3:** Individuals with no follow-up data were given a K10 score at six months that was 4 points lower than their baseline score.

The outcome analyses were again repeated on the 50 imputed datasets, and the intervention effect results combined across the resulting estimates.

While the effect sizes were slightly different from the main study result (Supplementary Table R7), these assumptions of data being MNAR had relatively minor impact on effect sizes. The most conservative result was under Scenario 1, assuming outcomes for those with no follow-up data were 4 points worse than imputed, returned a mean difference of 2.03, 95% CI -0.63, 4.70.

Note that the confidence intervals with the MNAR sensitivity analyses are likely to be conservative (i.e. not as wide as they should be) because the differences applied from the imputed or baseline values in each scenario were fixed rather than stochastic quantities (i.e. assumes that the applied difference from the imputed or baseline score was always a fixed quantity for all people).

Supplementary Table R7. Estimates of primary outcome (K10) effect size at 6 months under different assumptions of missing outcome profiles in participants with no follow-up data.

| Analysis                                                        | Mean difference in K10 at 6 months (95% CI) |
|-----------------------------------------------------------------|---------------------------------------------|
| <b>Analysis of all participants with some follow-up (n=139)</b> |                                             |
| Adjusted for baseline covariates (main analysis*)               | 1.68 (-1.18, 4.55)                          |
| <b>Analysis including all randomised participants (n=160)</b>   |                                             |
| Imputed K10 outcome at 6 months (MAR assumption*)               | 1.78 (-0.96, 4.51)                          |
| Imputed K10 outcome at 6 months (MNAR assumptions*)             |                                             |
| 1. K10 at 6m set to 4 points worse than imputed                 | 2.03 (-0.63, 4.70)                          |
| 2. K10 at 6m set to baseline score                              | 1.45 (-0.95, 3.84)                          |
| 3. K10 at 6m set to 4 point worse than baseline                 | 1.71 (-0.95, 4.37)                          |

\* Result as reported in Table 3 of main body of paper.

\* MAR (missing at random) and MNAR (missing not at random) assumptions are for the 21 participants lost to follow up (no post-baseline data).

**Table 1: CONSORT 2010 checklist of information to include when reporting a cluster randomised trial**

| Section/Topic                    | Item No | Standard Checklist item                                                                                                                | Extension for cluster designs                                                                | Page No *                                |
|----------------------------------|---------|----------------------------------------------------------------------------------------------------------------------------------------|----------------------------------------------------------------------------------------------|------------------------------------------|
| <b>Title and abstract</b>        |         |                                                                                                                                        |                                                                                              |                                          |
|                                  | 1a      | Identification as a randomised trial in the title                                                                                      | Identification as a cluster randomised trial in the title                                    | Title page                               |
|                                  | 1b      | Structured summary of trial design, methods, results, and conclusions (for specific guidance see CONSORT for abstracts) <sup>1,2</sup> | See table 2                                                                                  | In abstract                              |
| <b>Introduction</b>              |         |                                                                                                                                        |                                                                                              |                                          |
| <b>Background and objectives</b> | 2a      | Scientific background and explanation of rationale                                                                                     | Rationale for using a cluster design                                                         | p. 4-5<br>also p. 6 (methods)            |
|                                  | 2b      | Specific objectives or hypotheses                                                                                                      | Whether objectives pertain to the cluster level, the individual participant level or both    | p. 4                                     |
| <b>Methods</b>                   |         |                                                                                                                                        |                                                                                              |                                          |
| <b>Trial design</b>              | 3a      | Description of trial design (such as parallel, factorial) including allocation ratio                                                   | Definition of cluster and description of how the design features apply to the clusters       | p. 4-5                                   |
|                                  | 3b      | Important changes to methods after trial commencement (such as eligibility criteria), with reasons                                     |                                                                                              | n/a                                      |
| <b>Participants</b>              | 4a      | Eligibility criteria for participants                                                                                                  | Eligibility criteria for clusters                                                            | p.4 (for both clusters and participants) |
|                                  | 4b      | Settings and locations where the data were collected                                                                                   |                                                                                              | p. 4                                     |
| <b>Interventions</b>             | 5       | The interventions for each group with sufficient details to allow replication, including how and when they were actually administered  | Whether interventions pertain to the cluster level, the individual participant level or both | p. 7                                     |
| <b>Outcomes</b>                  | 6a      | Completely defined pre-                                                                                                                | Whether outcome measures                                                                     | p. 8                                     |

|                                         |     |                                                                                                                                                                                             |                                                                                                                                                                                                                         |                                               |
|-----------------------------------------|-----|---------------------------------------------------------------------------------------------------------------------------------------------------------------------------------------------|-------------------------------------------------------------------------------------------------------------------------------------------------------------------------------------------------------------------------|-----------------------------------------------|
|                                         |     | specified primary and secondary outcome measures, including how and when they were assessed                                                                                                 | pertain to the cluster level, the individual participant level or both                                                                                                                                                  |                                               |
|                                         | 6b  | Any changes to trial outcomes after the trial commenced, with reasons                                                                                                                       |                                                                                                                                                                                                                         | n/a                                           |
| <b>Sample size</b>                      | 7a  | How sample size was determined                                                                                                                                                              | Method of calculation, number of clusters(s) (and whether equal or unequal cluster sizes are assumed), cluster size, a coefficient of intracluster correlation (ICC or <i>k</i> ), and an indication of its uncertainty | p. 8-9                                        |
|                                         | 7b  | When applicable, explanation of any interim analyses and stopping guidelines                                                                                                                |                                                                                                                                                                                                                         | n/a (no interim analysis was applied)         |
| <b>Randomisation:</b>                   |     |                                                                                                                                                                                             |                                                                                                                                                                                                                         |                                               |
| <b>Sequence generation</b>              | 8a  | Method used to generate the random allocation sequence                                                                                                                                      |                                                                                                                                                                                                                         | p. 6                                          |
|                                         | 8b  | Type of randomisation; details of any restriction (such as blocking and block size)                                                                                                         | Details of stratification or matching if used                                                                                                                                                                           | p. 6                                          |
| <b>Allocation concealment mechanism</b> | 9   | Mechanism used to implement the random allocation sequence (such as sequentially numbered containers), describing any steps taken to conceal the sequence until interventions were assigned | Specification that allocation was based on clusters rather than individuals and whether allocation concealment (if any) was at the cluster level, the individual participant level or both                              | n/a                                           |
| <b>Implementation</b>                   | 10  | Who generated the random allocation sequence, who enrolled participants, and who assigned participants to interventions                                                                     | Replace by 10a, 10b and 10c                                                                                                                                                                                             |                                               |
|                                         | 10a |                                                                                                                                                                                             | Who generated the random allocation sequence, who enrolled clusters, and who assigned clusters to interventions                                                                                                         | p. 6 (Recruitment and Randomisation sections) |

|                            |     |                                                                                                                                                |                                                                                                                                                                     |                                                                                                                                     |
|----------------------------|-----|------------------------------------------------------------------------------------------------------------------------------------------------|---------------------------------------------------------------------------------------------------------------------------------------------------------------------|-------------------------------------------------------------------------------------------------------------------------------------|
|                            | 10b |                                                                                                                                                | Mechanism by which individual participants were included in clusters for the purposes of the trial (such as complete enumeration, random sampling)                  | p. 7 (Recruitment procedures subsection)                                                                                            |
|                            | 10c |                                                                                                                                                | From whom consent was sought (representatives of the cluster, or individual cluster members, or both), and whether consent was sought before or after randomisation | p. 6 (for GPs as the clusters) and p.7 (consent for the patients)                                                                   |
| <b>Blinding</b>            |     |                                                                                                                                                |                                                                                                                                                                     |                                                                                                                                     |
|                            | 11a | If done, who was blinded after assignment to interventions (for example, participants, care providers, those assessing outcomes) and how       |                                                                                                                                                                     | GPs unable to be blinded (p 6)<br><br>Statistician blinded during analysis (p. 9)<br><br>Research assistant unable to be blinded    |
|                            | 11b | If relevant, description of the similarity of interventions                                                                                    |                                                                                                                                                                     | n/a                                                                                                                                 |
| <b>Statistical methods</b> |     |                                                                                                                                                |                                                                                                                                                                     |                                                                                                                                     |
|                            | 12a | Statistical methods used to compare groups for primary and secondary outcomes                                                                  | How clustering was taken into account                                                                                                                               | p.9-10<br><br>Analysis and clustering noted on p. 9                                                                                 |
|                            | 12b | Methods for additional analyses, such as subgroup analyses and adjusted analyses                                                               |                                                                                                                                                                     | p. 10                                                                                                                               |
| <b>Results</b>             |     |                                                                                                                                                |                                                                                                                                                                     |                                                                                                                                     |
|                            | 13a | For each group, the numbers of participants who were randomly assigned, received intended treatment, and were analysed for the primary outcome | For each group, the numbers of clusters that were randomly assigned, received intended treatment, and were analysed for the primary outcome                         | Clusters (GPs) noted on p. 11, additional detail in Supplementary Table R1.<br><br>Individual patients noted on p. 11, flowchart in |

|                                |     |                                                                                                                                         |                                                                                                                            |                                                                                                                                                                                                |
|--------------------------------|-----|-----------------------------------------------------------------------------------------------------------------------------------------|----------------------------------------------------------------------------------------------------------------------------|------------------------------------------------------------------------------------------------------------------------------------------------------------------------------------------------|
|                                |     |                                                                                                                                         |                                                                                                                            | Figure 1 (including who was covered in analysis)                                                                                                                                               |
|                                | 13b | For each group, losses and exclusions after randomisation, together with reasons                                                        | For each group, losses and exclusions for both clusters and individual cluster members                                     | Clusters (GPs) covered on p.11 (no losses or exclusions, other than zero-recruitment which is covered in Supplementary Table R1)<br><br>Patients covered in Figure 1                           |
| <b>Recruitment</b>             | 14a | Dates defining the periods of recruitment and follow-up                                                                                 |                                                                                                                            | p. 5                                                                                                                                                                                           |
|                                | 14b | Why the trial ended or was stopped                                                                                                      |                                                                                                                            | p. 5                                                                                                                                                                                           |
| <b>Baseline data</b>           | 15  | A table showing baseline demographic and clinical characteristics for each group                                                        | Baseline characteristics for the individual and cluster levels as applicable for each group                                | Individual level characteristics reported in Table 1.                                                                                                                                          |
| <b>Numbers analysed</b>        | 16  | For each group, number of participants (denominator) included in each analysis and whether the analysis was by original assigned groups | For each group, number of clusters included in each analysis                                                               | Analysis by original assigned groups (methods, p. 9)<br><br>Number of participants for each analysis: Table 2, Table 3<br><br>Number of clusters (across all analyses): Supplementary Table R1 |
| <b>Outcomes and estimation</b> | 17a | For each primary and secondary outcome, results for each group, and the estimated effect size and its precision (such as 95%            | Results at the individual or cluster level as applicable and a coefficient of intracluster correlation (ICC or k) for each | Effect size and precision given in all tables and figures, and for outcomes                                                                                                                    |

|                           |     |                                                                                                                                           |                                                                           |                                                                                                              |
|---------------------------|-----|-------------------------------------------------------------------------------------------------------------------------------------------|---------------------------------------------------------------------------|--------------------------------------------------------------------------------------------------------------|
|                           |     | confidence interval)                                                                                                                      | primary outcome                                                           | reported in body of text                                                                                     |
|                           |     |                                                                                                                                           |                                                                           | ICC reported on p 17 for primary outcomes, and Supplementary Table R4 for all outcomes.                      |
|                           | 17b | For binary outcomes, presentation of both absolute and relative effect sizes is recommended                                               |                                                                           | n/a (no binary outcomes used in study)                                                                       |
| <b>Ancillary analyses</b> | 18  | Results of any other analyses performed, including subgroup analyses and adjusted analyses, distinguishing pre-specified from exploratory |                                                                           | ICCs reported on page 17 (as noted above)<br><br>Information on additional treatment received presented p 17 |
| <b>Harms</b>              | 19  | All important harms or unintended effects in each group (for specific guidance see CONSORT for harms <sup>3</sup> )                       |                                                                           | n/a                                                                                                          |
| <b>Discussion</b>         |     |                                                                                                                                           |                                                                           |                                                                                                              |
| <b>Limitations</b>        | 20  | Trial limitations, addressing sources of potential bias, imprecision, and, if relevant, multiplicity of analyses                          |                                                                           | P 18-19 (recruitment not completed to planned sample size)<br><br>p 20-21 (other limitations)                |
| <b>Generalisability</b>   | 21  | Generalisability (external validity, applicability) of the trial findings                                                                 | Generalisability to clusters and/or individual participants (as relevant) | p. 20-21                                                                                                     |
| <b>Interpretation</b>     | 22  | Interpretation consistent with results, balancing benefits and harms, and considering other relevant evidence                             |                                                                           | (across discussion)                                                                                          |
| <b>Other information</b>  |     |                                                                                                                                           |                                                                           |                                                                                                              |

|                     |    |                                                                                 |                                 |
|---------------------|----|---------------------------------------------------------------------------------|---------------------------------|
| <b>Registration</b> | 23 | Registration number and name of trial registry                                  | p.4                             |
| <b>Protocol</b>     | 24 | Where the full trial protocol can be accessed, if available                     | p. 4, reference list for detail |
| <b>Funding</b>      | 25 | Sources of funding and other support (such as supply of drugs), role of funders | p. 22-23                        |

\* Note: page numbers optional depending on journal requirements

For peer review only



**Table 2: Extension of CONSORT for abstracts<sup>1,2</sup> to reports of cluster randomised trials**

| Item                      | Standard Checklist item                                                                                     | Extension for cluster trials                                                                                   |
|---------------------------|-------------------------------------------------------------------------------------------------------------|----------------------------------------------------------------------------------------------------------------|
| <b>Title</b>              | Identification of study as randomised                                                                       | <b>Identification of study as cluster randomised</b>                                                           |
| <b>Trial design</b>       | Description of the trial design (e.g. parallel, cluster, non-inferiority)                                   |                                                                                                                |
| <b>Methods</b>            |                                                                                                             |                                                                                                                |
| <b>Participants</b>       | Eligibility criteria for participants and the settings where the data were collected                        | <b>Eligibility criteria for clusters</b>                                                                       |
| <b>Interventions</b>      | Interventions intended for each group                                                                       |                                                                                                                |
| <b>Objective</b>          | Specific objective or hypothesis                                                                            | <b>Whether objective or hypothesis pertains to the cluster level, the individual participant level or both</b> |
| <b>Outcome</b>            | Clearly defined primary outcome for this report                                                             | <b>Whether the primary outcome pertains to the cluster level, the individual participant level or both</b>     |
| <b>Randomization</b>      | How participants were allocated to interventions                                                            | <b>How clusters were allocated to interventions</b>                                                            |
| <b>Blinding (masking)</b> | Whether or not participants, care givers, and those assessing the outcomes were blinded to group assignment |                                                                                                                |
| <b>Results</b>            |                                                                                                             |                                                                                                                |
| <b>Numbers randomized</b> | Number of participants randomized to each group                                                             | <b>Number of clusters randomized to each group</b>                                                             |
| Recruitment               | Trial status <sup>1</sup>                                                                                   |                                                                                                                |
| <b>Numbers analysed</b>   | Number of participants analysed in each group                                                               | <b>Number of clusters analysed in each group</b>                                                               |
| <b>Outcome</b>            | For the primary outcome, a result for each group and the estimated effect size and its precision            | <b>Results at the cluster or individual participant level as applicable for each primary outcome</b>           |
| <b>Harms</b>              | Important adverse events or side effects                                                                    |                                                                                                                |
| <b>Conclusions</b>        | General interpretation of the results                                                                       |                                                                                                                |
| <b>Trial registration</b> | Registration number and name of trial register                                                              |                                                                                                                |
| <b>Funding</b>            | Source of funding                                                                                           |                                                                                                                |

<sup>1</sup> Relevant to Conference Abstracts

## REFERENCES

- 1 Hopewell S, Clarke M, Moher D, Wager E, Middleton P, Altman DG, et al. CONSORT for reporting randomised trials in journal and conference abstracts. *Lancet* 2008, 371:281-283
- 2 Hopewell S, Clarke M, Moher D, Wager E, Middleton P, Altman DG at al (2008) CONSORT for reporting randomized controlled trials in journal and conference abstracts: explanation and elaboration. *PLoS Med* 5(1): e20
- 3 Ioannidis JP, Evans SJ, Gotzsche PC, O'Neill RT, Altman DG, Schulz K, Moher D. Better reporting of harms in randomized trials: an extension of the CONSORT statement. *Ann Intern Med* 2004; 141(10):781-788.
